# Supplementary material for: Iridium-catalyzed C–H phosphoramidation of N-aryl-7-azaindoles with phosphoryl azides
Source: Royal Society of Chemistry journal article supplement (doi:10.1039/c8ob00776d), 2018-01-01

# Supporting Information

## Iridium-catalyzed C–H phosphoramidation of N-aryl-7-azaindoles with phosphoryl azides

Changduo Pan,\* Yun Wang, Chao Wu and Jin-Tao Yu

*E-mail: panchangduo@jsut.edu.cn*

1. General experimental details.....S2
2. Mechanism Studies.....S2
3. Characterization data of the products .....S4
4. Copies of  $^1\text{H}$  NMR,  $^{13}\text{C}$  NMR and  $^{31}\text{P}$  NMR spectra of the products.....S12

## 1. General experimental details

**General Information:** All chemicals were used as received without further purification unless stated otherwise. NMR spectra were recorded at ambient temperature on a 300 or 400 MHz NMR spectrometer. Chemical shifts ( $\delta$ ) are given in ppm relative to TMS, the coupling constants  $J$  are given in Hz. HRMS were recorded on a TOF LC/MS equipped with electrospray ionization (ESI) probe operating in positive or negative ion mode.

**Experimental procedure:** Under  $N_2$ , the mixture of **1** (0.2 mmol), **2** (1.5 equiv),  $[IrCp^*Cl_2]_2$  (5 mol%, 8.0 mg),  $AgNTf_2$  (20 mol%, 15.5 mg) and DCE (2 mL) were added into the sealed tubed. The reaction mixture was vigorously stirred at 80 °C for 24h. Then, the solvent was evaporated under reduced pressure and the residue was purified by flash column chromatography on silica gel to give the products.

## 2. Mechanism Studies

The reaction of *N*-phenyl 7-azaindole **1a** with  $D_2O$  to give **deutrio-1a**:

Under  $N_2$ , the mixture of *N*-phenyl 7-azaindole **1a** (0.1 mmol, 19.4 mg),  $[IrCp^*Cl_2]_2$  (5 mol%, 8.0 mg),  $AgNTf_2$  (20 mol%, 15.5 mg), DCE (1 mL) and  $D_2O$  (0.1 mL) were added into the tube and sealed. The reaction mixture was vigorously stirred at 80 °C for 24 h. Then, the solvent was evaporated under reduced pressure and the residue was purified by flash column chromatography on silica gel to give the **deutrio-1a** in 99% yield.  $^1H$  NMR ( $CDCl_3$ , 400 MHz):  $\delta$  8.42-8.40 (m, 1H), 8.01-7.98 (m, 1H), 7.78 (d,  $J = 7.9$  Hz, 0.42H), 7.56-7.54 (m, 3H), 7.38-7.34 (t,  $J = 7.4$  Hz, 1H), 7.18-7.14 (m, 1H), 6.66 (d,  $J = 3.5$  Hz, 1H).

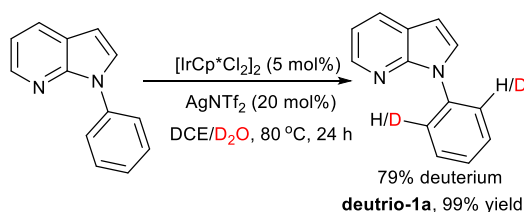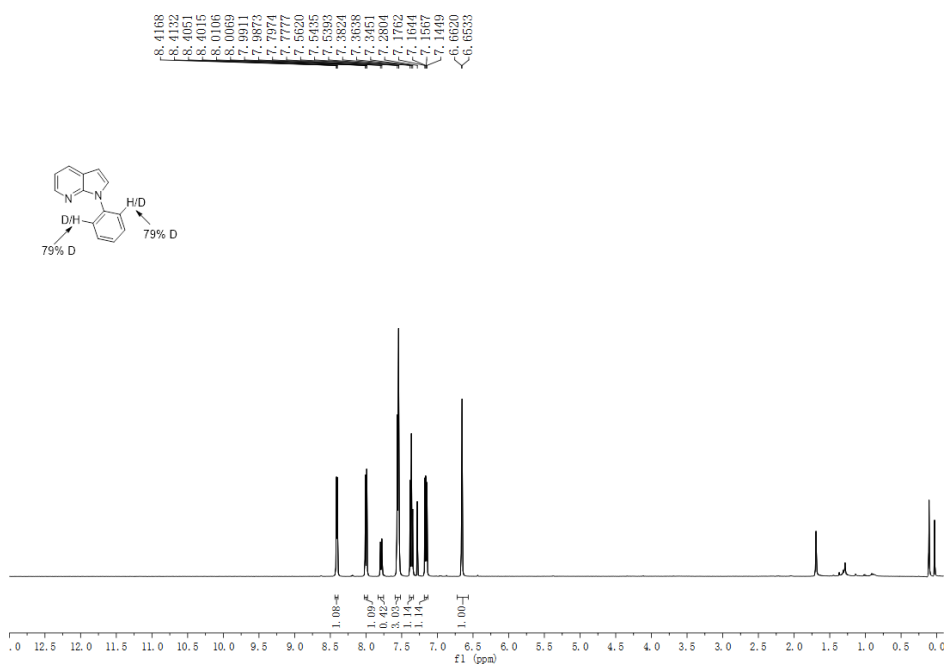

### Intermolecular competition experiment with isotopically labeled **1a-d<sub>5</sub>**

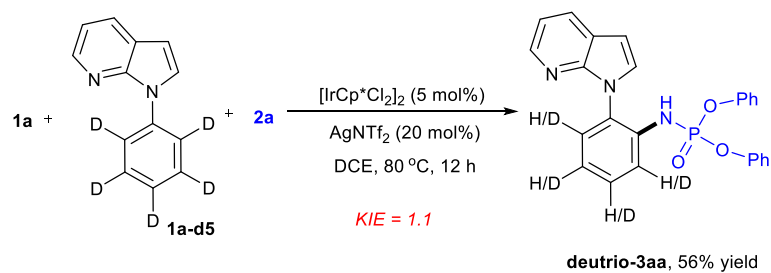

Under N<sub>2</sub>, the mixture of **1a** (9.2 mg, 0.05 mmol), **1a-d<sub>5</sub>** (9.9 mg, 0.05 mmol), **2a** (41.2 mg, 0.3 mmol), [IrCp\*Cl<sub>2</sub>]<sub>2</sub> (5 mol%, 8.0 mg), AgNTf<sub>2</sub> (20 mol%, 15.5 mg) and DCE (1 mL) were added into the tube and sealed. The mixture was stirred at 80 °C for 12 h. Then, the solvent was evaporated under reduced pressure and the residue was purified by flash column chromatography on silica gel to give the **deutrio-3aa** in 56% yield. <sup>1</sup>H NMR (CDCl<sub>3</sub>, 400 MHz): δ 8.27-8.25 (m, 1H), 7.99-7.97 (m, 1H), 7.79 (d, *J* = 8.1 Hz, 0.55H), 7.45-7.41 (m, 0.58H), 7.26-7.07 (m, 15H), 6.61 (d, *J* = 3.6 Hz, 1H).

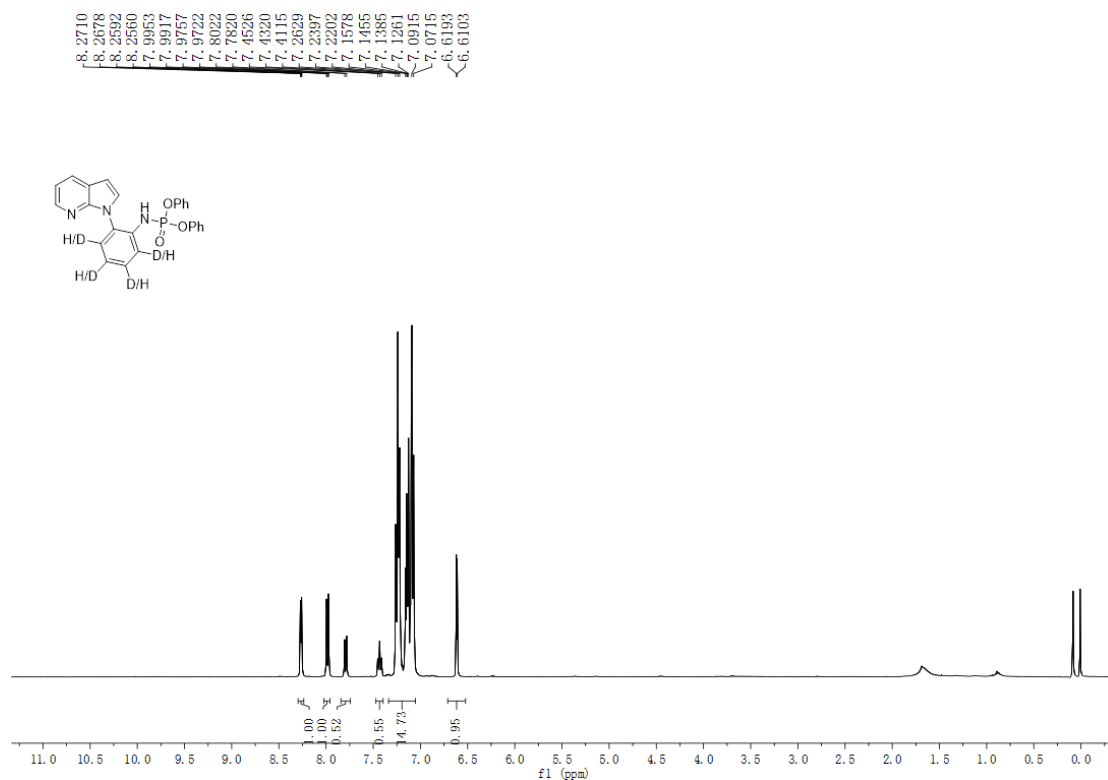

### 3. Characterization data of the products

#### diphenyl (2-(1H-pyrrolo[2,3-b]pyridin-1-yl)phenyl)phosphoramidate (3aa)

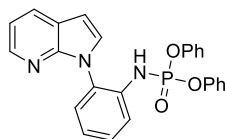

$^1\text{H}$  NMR ( $\text{CDCl}_3$ , 300 MHz):  $\delta$  8.26-8.24 (m, 1H), 7.98-7.95 (m, 1H), 7.78 (d,  $J = 8.3$  Hz, 1H), 7.45-7.38 (m, 1H), 7.26-7.05 (m, 15H), 6.60 (d,  $J = 3.6$  Hz, 1H).  $^{13}\text{C}$  NMR ( $\text{CDCl}_3$ , 100 MHz):  $\delta$  150.4 (d,  $J = 6.7$  Hz), 147.7, 143.5, 134.2 (d,  $J = 2.0$  Hz), 130.7 (d,  $J = 10.3$  Hz), 130.1, 129.7, 129.3, 128.7, 127.7, 125.2, 124.5, 123.0 (d,  $J = 1.0$  Hz), 121.5, 120.2 (d,  $J = 4.9$  Hz), 116.8, 102.8.  $^{31}\text{P}$  NMR ( $\text{CDCl}_3$ , 162 MHz):  $\delta -7.32$ . HRMS (ESI)  $m/z$  calcd for  $\text{C}_{25}\text{H}_{21}\text{N}_3\text{O}_3\text{P}$  ( $\text{M}+\text{H}$ ) $^+$  442.1315, found 442.1317.

#### diphenyl (5-methyl-2-(1H-pyrrolo[2,3-b]pyridin-1-yl)phenyl)phosphoramidate (3ba)

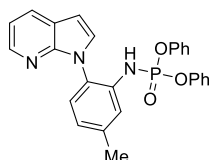

$^1\text{H}$  NMR ( $\text{CDCl}_3$ , 400 MHz):  $\delta$  8.27-8.25 (m, 1H), 7.99-7.97 (m, 1H), 7.59 (s, 1H), 7.28-7.24 (m, 4H), 7.16-7.02 (m, 11H), 6.61 (d,  $J = 3.6$  Hz, 1H), 2.46 (s, 3H).  $^{13}\text{C}$  NMR ( $\text{CDCl}_3$ , 100 MHz):  $\delta$  150.4 (d,  $J = 6.8$  Hz), 147.7, 143.5, 138.9, 133.9 (d,  $J = 1.9$  Hz), 129.9, 129.7, 129.4, 128.0 (d,  $J = 10.3$  Hz), 127.4, 125.2, 123.4, 121.4, 120.2 (d,  $J = 4.9$  Hz), 116.7, 102.5, 21.4.  $^{31}\text{P}$  NMR ( $\text{CDCl}_3$ , 162 MHz):  $\delta -7.26$ . HRMS (ESI)  $m/z$  calcd for  $\text{C}_{26}\text{H}_{23}\text{N}_3\text{O}_3\text{P}$  ( $\text{M}+\text{H}$ ) $^+$  456.1472, found 456.1471.

#### diphenyl (4-methyl-2-(1H-pyrrolo[2,3-b]pyridin-1-yl)phenyl)phosphoramidate (3ca)

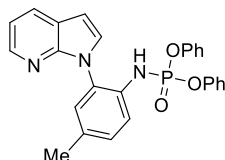

$^1\text{H}$  NMR ( $\text{CDCl}_3$ , 400 MHz):  $\delta$  8.26-8.24 (m, 1H), 7.98-7.95 (m, 1H), 7.65 (d,  $J = 8.3$  Hz, 1H), 7.25-7.20 (m, 5H), 7.14-6.97 (m, 9H), 6.59 (d,  $J = 3.6$  Hz, 1H), 2.35 (s, 3H).  $^{13}\text{C}$  NMR ( $\text{CDCl}_3$ , 100 MHz):  $\delta$  150.4 (d,  $J = 6.7$  Hz), 147.7, 143.5, 134.5, 131.4 (d,  $J = 1.2$  Hz), 130.7 (d,  $J = 10.2$  Hz), 129.9, 129.7, 129.3 (d,  $J = 6.0$  Hz), 128.1, 125.1, 123.2, 121.5, 120.2 (d,  $J = 4.8$  Hz), 116.7, 102.6, 20.7.  $^{31}\text{P}$  NMR ( $\text{CDCl}_3$ , 162 MHz):  $\delta -7.04$ . HRMS (ESI)  $m/z$  calcd for  $\text{C}_{26}\text{H}_{23}\text{N}_3\text{O}_3\text{P}$  ( $\text{M}+\text{H}$ ) $^+$  456.1472, found 456.1470.

#### diphenyl (5-(tert-butyl)-2-(1H-pyrrolo[2,3-b]pyridin-1-yl)phenyl)phosphoramidate (3da)

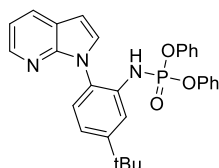

$^1\text{H}$  NMR ( $\text{CDCl}_3$ , 400 MHz):  $\delta$  8.31-8.29 (m, 1H), 8.01-7.98 (m, 1H), 7.81-7.80 (m, 1H), 7.28-7.24 (m, 5H), 7.19-7.09 (m, 9H), 7.03-6.99 (m, 1H), 6.62 (d,  $J = 3.6$  Hz, 1H), 1.40 (s, 9H).

$^{13}\text{C}$  NMR ( $\text{CDCl}_3$ , 100 MHz):  $\delta$  151.9, 150.4 (d,  $J = 6.8$  Hz), 147.7, 143.5, 133.5 (d,  $J = 0.9$  Hz), 129.9, 129.7, 129.3, 127.9 (d,  $J = 10.2$  Hz), 127.1, 125.2, 121.6, 121.4, 120.3 (d,  $J = 1.4$  Hz), 120.2 (d,  $J = 4.9$  Hz), 116.7, 102.5, 34.9, 31.4.  $^{31}\text{P}$  NMR ( $\text{CDCl}_3$ , 162 MHz):  $\delta$  -7.19. HRMS (ESI)  $m/z$  calcd for  $\text{C}_{29}\text{H}_{29}\text{N}_3\text{O}_3\text{P}$  ( $\text{M}+\text{H}$ ) $^+$  498.1941, found 498.1946.

**diphenyl (5-methoxy-2-(1H-pyrrolo[2,3-b]pyridin-1-yl)phenyl)phosphoramidate (3ea)**

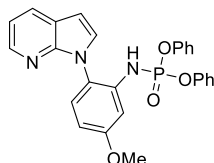

$^1\text{H}$  NMR ( $\text{CDCl}_3$ , 400 MHz):  $\delta$  8.28-8.26 (m, 1H), 7.99-7.97 (m, 1H), 7.34-7.26 (m, 5H), 7.18-7.12 (m, 8H), 7.05-7.04 (m, 1H), 6.83-6.74 (m, 2H), 6.60 (d,  $J = 3.4$  Hz, 1H), 3.87 (s, 3H).  $^{13}\text{C}$  NMR ( $\text{CDCl}_3$ , 100 MHz):  $\delta$  159.8, 150.2 (d,  $J = 6.8$  Hz), 147.8, 143.6, 135.5, 129.9, 129.8, 129.4, 128.7, 125.3, 123.0 (d,  $J = 10.6$  Hz), 121.2, 120.3 (d,  $J = 4.6$  Hz), 116.7, 109.8, 107.5, 102.4, 55.7.  $^{31}\text{P}$  NMR ( $\text{CDCl}_3$ , 162 MHz):  $\delta$  -7.63. HRMS (ESI)  $m/z$  calcd for  $\text{C}_{26}\text{H}_{23}\text{N}_3\text{O}_4\text{P}$  ( $\text{M}+\text{H}$ ) $^+$  472.1421, found 472.1420.

**diphenyl (2-(1H-pyrrolo[2,3-b]pyridin-1-yl)-5-(trifluoromethoxy)phenyl)phosphoramidate (3fa)**

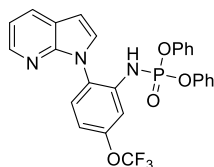

$^1\text{H}$  NMR ( $\text{CDCl}_3$ , 400 MHz):  $\delta$  8.28-8.27 (m, 1H), 8.01-7.99 (m, 1H), 7.70-7.69 (m, 1H), 7.30-7.25 (m, 6H), 7.19-7.06 (m, 9H), 6.65 (d,  $J = 3.6$  Hz, 1H).  $^{13}\text{C}$  NMR ( $\text{CDCl}_3$ , 100 MHz):  $\delta$  150.2 (d,  $J = 6.8$  Hz), 148.8, 147.7, 143.7, 135.8, 130.3, 129.8, 129.0, 128.7, 128.6, 127.2, 125.4, 121.5, 120.1 (d,  $J = 4.7$  Hz), 117.1, 116.3, 115.1, 103.4.  $^{31}\text{P}$  NMR ( $\text{CDCl}_3$ , 162 MHz):  $\delta$  -8.32. HRMS (ESI)  $m/z$  calcd for  $\text{C}_{26}\text{H}_{20}\text{F}_3\text{N}_3\text{O}_4\text{P}$  ( $\text{M}+\text{H}$ ) $^+$  526.1138, found 526.1142.

**diphenyl (5-fluoro-2-(1H-pyrrolo[2,3-b]pyridin-1-yl)phenyl)phosphoramidate (3ga)**

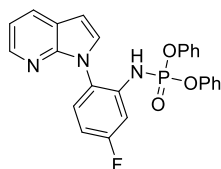

$^1\text{H}$  NMR ( $\text{CDCl}_3$ , 400 MHz):  $\delta$  8.27-8.26 (m, 1H), 8.00-7.98 (m, 1H), 7.56-7.53 (m, 1H), 7.31-7.26 (m, 4H), 7.23-7.04 (m, 10H), 6.94-6.89 (m, 1H), 6.63 (d,  $J = 3.6$  Hz, 1H).  $^{13}\text{C}$  NMR ( $\text{CDCl}_3$ , 75 MHz):  $\delta$  162.3 (d,  $J = 245.8$  Hz), 150.2 (d,  $J = 7.0$  Hz), 147.8, 143.6, 136.2 (q,  $J_1 = 1.7$  Hz,  $J_2 = 11.3$  Hz), 130.8, 129.8 (d,  $J = 0.8$  Hz), 129.2, 129.0 (d,  $J = 9.9$  Hz), 126.1 (q,  $J_1 = 3.1$  Hz,  $J_2 = 10.7$  Hz), 125.4 (d,  $J = 1.3$  Hz), 121.3, 120.2 (d,  $J = 4.9$  Hz), 116.9, 109.6 (d,  $J = 1.7$  Hz), 109.2 (d,  $J = 1.6$  Hz), 102.9.  $^{31}\text{P}$  NMR ( $\text{CDCl}_3$ , 162 MHz):  $\delta$  -8.17. HRMS (ESI)  $m/z$  calcd for  $\text{C}_{25}\text{H}_{20}\text{FN}_3\text{O}_3\text{P}$  ( $\text{M}+\text{H}$ ) $^+$  460.1221, found 460.1222.

**diphenyl (5-chloro-2-(1H-pyrrolo[2,3-b]pyridin-1-yl)phenyl)phosphoramidate (3ha)**

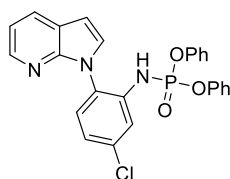

$^1\text{H}$  NMR ( $\text{CDCl}_3$ , 400 MHz):  $\delta$  8.26-8.25 (m, 1H), 7.99-7.97 (m, 1H), 7.80 (d,  $J = 1.1$  Hz, 1H), 7.33-7.25 (m, 5H), 7.18-7.05 (m, 10H), 6.63 (d,  $J = 3.6$  Hz, 1H).  $^{13}\text{C}$  NMR ( $\text{CDCl}_3$ , 100 MHz):  $\delta$  150.2 (d,  $J = 7.0$  Hz), 147.7, 143.6, 135.4 (d,  $J = 1.6$  Hz), 134.2, 130.2, 129.8, 129.1, 129.0, 128.5, 125.4, 124.4, 122.8 (d,  $J = 1.0$  Hz), 121.5, 120.2 (d,  $J = 4.9$  Hz), 116.9, 103.2.  $^{31}\text{P}$  NMR ( $\text{CDCl}_3$ , 162 MHz):  $\delta$  -8.08. HRMS (ESI)  $m/z$  calcd for  $\text{C}_{25}\text{H}_{20}\text{ClN}_3\text{O}_3\text{P}$  ( $\text{M}+\text{H}$ ) $^+$  476.0925, found 476.0927.

**diphenyl (4-chloro-2-(1H-pyrrolo[2,3-b]pyridin-1-yl)phenyl)phosphoramidate (3ia)**

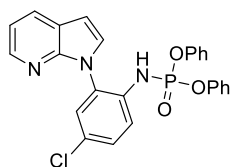

$^1\text{H}$  NMR ( $\text{CDCl}_3$ , 400 MHz):  $\delta$  8.26-8.27 (m, 1H), 8.02-8.00 (m, 1H), 7.73 (d,  $J = 8.7$  Hz, 1H), 7.42-7.33 (m, 2H), 7.28-7.23 (m, 5H), 7.19-7.13 (m, 3H), 7.11-7.06 (m, 5H), 6.65 (d,  $J = 3.5$  Hz, 1H).  $^{13}\text{C}$  NMR ( $\text{CDCl}_3$ , 75 MHz):  $\delta$  150.3 (d,  $J = 6.9$  Hz), 147.7, 143.5, 132.9 (d,  $J = 2.2$  Hz), 131.9 (d,  $J = 10.4$  Hz), 130.3, 129.7, 129.3, 129.0, 128.5, 127.4, 125.2 (d,  $J = 1.3$  Hz), 124.4 (d,  $J = 1.6$  Hz), 121.6, 120.1 (d,  $J = 4.8$  Hz), 117.1, 103.5.  $^{31}\text{P}$  NMR ( $\text{CDCl}_3$ , 162 MHz):  $\delta$  -7.64. HRMS (ESI)  $m/z$  calcd for  $\text{C}_{25}\text{H}_{20}\text{ClN}_3\text{O}_3\text{P}$  ( $\text{M}+\text{H}$ ) $^+$  476.0925, found 476.0927.

**diphenyl (5-bromo-2-(1H-pyrrolo[2,3-b]pyridin-1-yl)phenyl)phosphoramidate (3ja)**

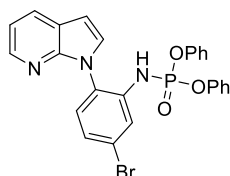

$^1\text{H}$  NMR ( $\text{CDCl}_3$ , 400 MHz):  $\delta$  8.26-8.24 (m, 1H), 7.99-7.94 (m, 2H), 7.40-7.26 (m, 6H), 7.18-7.05 (m, 9H), 6.63 (d,  $J = 3.6$  Hz, 1H).  $^{13}\text{C}$  NMR ( $\text{CDCl}_3$ , 100 MHz):  $\delta$  150.2 (d,  $J = 7.0$  Hz), 147.7, 143.5, 135.5 (d,  $J = 1.7$  Hz), 130.2, 129.8, 129.6, 128.9, 128.8, 127.4, 125.8 (d,  $J = 1.2$  Hz), 125.4, 121.9, 121.5, 120.2 (d,  $J = 4.9$  Hz), 117.0, 103.3.  $^{31}\text{P}$  NMR ( $\text{CDCl}_3$ , 162 MHz):  $\delta$  -8.09. HRMS (ESI)  $m/z$  calcd for  $\text{C}_{25}\text{H}_{20}\text{BrN}_3\text{O}_3\text{P}$  ( $\text{M}+\text{H}$ ) $^+$  520.0420, found 520.0425.

**diphenyl (4-(1H-pyrrolo[2,3-b]pyridin-1-yl)-[1,1'-biphenyl]-3-yl)phosphoramidate (3ka)**

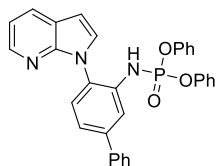

$^1\text{H}$  NMR ( $\text{CDCl}_3$ , 400 MHz):  $\delta$  8.32-8.30 (m, 1H), 8.02-8.00 (m, 2H), 7.67-7.65 (m, 2H), 7.52-7.40 (m, 4H), 7.35-7.25 (m, 6H), 7.19-7.12 (m, 8H), 6.65 (d,  $J = 3.6$  Hz, 1H).  $^{13}\text{C}$  NMR ( $\text{CDCl}_3$ , 100 MHz):  $\delta$  150.4 (d,  $J = 6.6$  Hz), 147.8, 143.5, 141.7, 139.9, 134.4 (d,  $J = 1.7$  Hz), 130.1, 129.7, 129.3, 128.9, 127.8 (d,  $J = 3.1$  Hz), 127.2, 125.3, 123.2, 121.8, 121.6, 120.3 (d,  $J = 4.8$  Hz), 116.8, 102.9.  $^{31}\text{P}$  NMR ( $\text{CDCl}_3$ , 162 MHz):  $\delta$  -7.27. HRMS (ESI)  $m/z$  calcd for  $\text{C}_{31}\text{H}_{25}\text{N}_3\text{O}_3\text{P}$  ( $\text{M}+\text{H}$ ) $^+$  518.1628, found 518.1631.

**diphenyl (2-(1H-pyrrolo[2,3-b]pyridin-1-yl)-5-(trifluoromethyl)phenyl)phosphoramidate**

**(31a)**

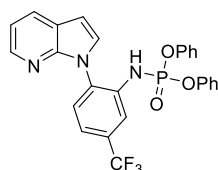

$^1\text{H}$  NMR ( $\text{CDCl}_3$ , 400 MHz):  $\delta$  8.29-8.28 (m, 1H), 8.05-8.01 (m, 2H), 7.63-7.59 (m, 1H), 7.47 (d,  $J = 8.2$  Hz, 1H), 7.35 (d,  $J = 8.2$  Hz, 1H), 7.29-7.25 (m, 4H), 7.21-7.09 (m, 8H), 6.69 (d,  $J = 3.6$  Hz, 1H).  $^{13}\text{C}$  NMR ( $\text{CDCl}_3$ , 150 MHz):  $\delta$  150.2 (d,  $J = 6.8$  Hz), 147.7, 143.6, 134.7 (d,  $J = 1.9$  Hz), 133.7 (q,  $J = 1.3$  Hz), 133.6 (q,  $J = 1.3$  Hz), 130.4, 129.7, 128.9, 127.9, 125.3 (d,  $J = 1.1$  Hz), 123.6 (q,  $J = 270.8$  Hz), 121.7, 121.1 (q,  $J = 3.6$  Hz), 120.3 (q,  $J = 3.7$  Hz), 120.1 (d,  $J = 4.9$  Hz), 117.2, 103.9.  $^{31}\text{P}$  NMR ( $\text{CDCl}_3$ , 162 MHz):  $\delta$  -8.16. HRMS (ESI)  $m/z$  calcd for  $\text{C}_{26}\text{H}_{20}\text{F}_3\text{N}_3\text{O}_3\text{P}$  ( $\text{M}+\text{H}$ ) $^+$  510.1189, found 510.1185.

**ethyl 3-((diphenoxyphosphoryl)amino)-4-(1H-pyrrolo[2,3-b]pyridin-1-yl)benzoate (3ma)**

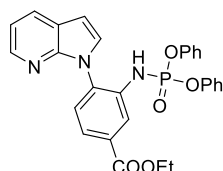

$^1\text{H}$  NMR ( $\text{CDCl}_3$ , 400 MHz):  $\delta$  8.51-8.50 (m, 1H), 8.29-8.27 (m, 1H), 8.00-7.98 (m, 1H), 7.92-7.89 (m, 1H), 7.71-7.67 (m, 1H), 7.32-7.24 (m, 5H), 7.19-7.12 (m, 8H), 6.65 (d,  $J = 3.6$  Hz, 1H), 4.48-4.42 (q, 2H), 1.45 (t,  $J = 7.1$  Hz, 3H).  $^{13}\text{C}$  NMR ( $\text{CDCl}_3$ , 100 MHz):  $\delta$  165.6, 150.4 (d,  $J = 6.9$  Hz), 147.7, 143.6, 134.9 (d,  $J = 10.1$  Hz), 133.9, 130.4, 130.3, 129.7, 129.0, 127.3, 125.7, 125.2, 124.7, 121.7, 120.2 (d,  $J = 4.8$  Hz), 117.1, 103.7, 61.4, 14.4.  $^{31}\text{P}$  NMR ( $\text{CDCl}_3$ , 162 MHz):  $\delta$  -7.81. HRMS (ESI)  $m/z$  calcd for  $\text{C}_{28}\text{H}_{25}\text{N}_3\text{O}_5\text{P}$  ( $\text{M}+\text{H}$ ) $^+$  514.1526, found 514.1530.

**diphenyl (5-acetyl-2-(1H-pyrrolo[2,3-b]pyridin-1-yl)phenyl)phosphoramidate (3na)**

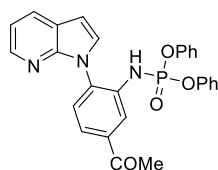

$^1\text{H}$  NMR ( $\text{CDCl}_3$ , 400 MHz):  $\delta$  8.34-8.33 (m, 1H), 8.29-8.27 (m, 1H), 8.01-7.99 (m, 1H), 7.83-7.78 (m, 2H), 7.37-7.32 (m, 1H), 7.28-7.24 (m, 4H), 7.20-7.09 (m, 8H), 6.67 (d,  $J = 3.6$  Hz,

1H), 2.64 (s, 3H). <sup>13</sup>C NMR (CDCl<sub>3</sub>, 100 MHz): δ 196.9, 150.3 (d, *J* = 6.9 Hz), 147.7, 143.5, 135.1 (d, *J* = 9.8 Hz), 134.1, 130.4, 129.7, 129.0, 127.4, 125.3, 124.3, 124.0, 121.8, 120.4 (d, *J* = 4.9 Hz), 120.2 (d, *J* = 4.9 Hz), 117.1, 103.8, 26.8. <sup>31</sup>P NMR (CDCl<sub>3</sub>, 162 MHz): δ -7.59. HRMS (ESI) *m/z* calcd for C<sub>27</sub>H<sub>23</sub>N<sub>3</sub>O<sub>4</sub>P (M+H)<sup>+</sup> 484.1421, found 484.1423.

**diphenyl 2-(1*H*-pyrrolo[2,3-*b*]pyridin-1-yl)thiophen-3-yl)phosphoramidate (3oa)**

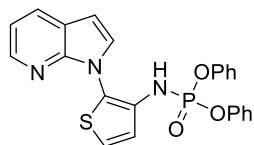

<sup>1</sup>H NMR (CDCl<sub>3</sub>, 400 MHz): δ 8.30-8.28 (m, 1H), 7.98-7.95 (m, 1H), 7.69-7.66 (m, 1H), 7.33-7.24 (m, 5H), 7.18-7.12 (m, 9H), 6.63 (d, *J* = 3.6 Hz, 1H). <sup>13</sup>C NMR (CDCl<sub>3</sub>, 100 MHz): δ 150.4 (d, *J* = 6.7 Hz), 147.6, 143.6, 130.2, 129.7, 129.3, 128.8 (d, *J* = 1.5 Hz), 125.2, 125.0 (d, *J* = 11.4 Hz), 123.3, 121.4, 120.8, 120.3 (d, *J* = 4.9 Hz), 117.1, 103.5. <sup>31</sup>P NMR (CDCl<sub>3</sub>, 162 MHz): δ -7.41. HRMS (ESI) *m/z* calcd for C<sub>23</sub>H<sub>19</sub>N<sub>3</sub>O<sub>3</sub>PS (M+H)<sup>+</sup> 448.0879, found 448.0882.

**diphenyl (3-methyl-2-(1*H*-pyrrolo[2,3-*b*]pyridin-1-yl)phenyl)phosphoramidate (3pa)**

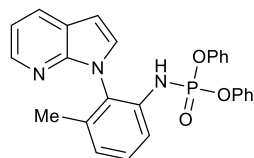

<sup>1</sup>H NMR (CDCl<sub>3</sub>, 600 MHz): δ 8.31-8.30 (m, 1H), 8.01-7.99 (m, 1H), 7.66 (d, *J* = 8.3 Hz, 1H), 7.43-7.08 (m, 12H), 7.09-7.07 (m, 1H), 6.84 (d, *J* = 3.5 Hz, 1H), 6.65 (d, *J* = 3.5 Hz, 1H), 5.23 (d, *J* = 10.4 Hz, 1H), 1.88 (s, 3H). <sup>13</sup>C NMR (CDCl<sub>3</sub>, 150 MHz): δ 150.2 (d, *J* = 6.4 Hz), 147.8, 144.3, 138.2, 136.5 (d, *J* = 2.0 Hz), 129.80, 129.79 (d, *J* = 4.9 Hz), 129.6, 129.5, 128.3, 125.4, 125.0, 120.6, 120.4 (d, *J* = 4.8 Hz), 116.9, 116.6, 102.7, 17.8. <sup>31</sup>P NMR (CDCl<sub>3</sub>, 162 MHz): δ -7.79. HRMS (ESI) *m/z* calcd for C<sub>26</sub>H<sub>23</sub>N<sub>3</sub>O<sub>3</sub>P (M+H)<sup>+</sup> 456.1472, found 456.1471.

**diphenyl (3-chloro-2-(1*H*-pyrrolo[2,3-*b*]pyridin-1-yl)phenyl)phosphoramidate (3qa)**

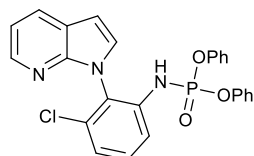

<sup>1</sup>H NMR (CDCl<sub>3</sub>, 600 MHz): δ 8.30 (d, *J* = 4.7 Hz, 1H), 8.00 (d, *J* = 7.8 Hz, 1H), 7.74 (d, *J* = 8.4 Hz, 1H), 7.46-7.43 (m, 1H), 7.35-7.28 (m, 5H), 7.24-7.15 (m, 7H), 6.94-6.93 (m, 1H), 6.68-6.67 (m, 1H), 5.59 (d, *J* = 10.0 Hz, 1H). <sup>13</sup>C NMR (CDCl<sub>3</sub>, 150 MHz): δ 150.1 (d, *J* = 6.6 Hz), 147.8, 144.2, 138.2 (d, *J* = 2.6 Hz), 134.3, 130.3, 129.8, 129.6, 128.7, 125.5 (d, *J* = 4.3 Hz), 124.4, 120.7, 120.2 (d, *J* = 4.7 Hz), 118.0, 117.2, 102.9. <sup>31</sup>P NMR (CDCl<sub>3</sub>, 162 MHz): δ -7.79. HRMS (ESI) *m/z* calcd for C<sub>25</sub>H<sub>20</sub>ClN<sub>3</sub>O<sub>3</sub>P (M+H)<sup>+</sup> 476.0925, found 476.0927.

**diphenyl (4-fluoro-2-(1*H*-pyrrolo[2,3-*b*]pyridin-1-yl)phenyl)phosphoramidate (3ra) and diphenyl (2-fluoro-6-(1*H*-pyrrolo[2,3-*b*]pyridin-1-yl)phenyl)phosphoramidate (3ra')**



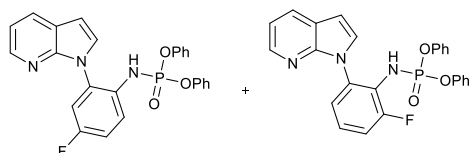

$^1\text{H}$  NMR ( $\text{CDCl}_3$ , 600 MHz):  $\delta$  8.29-8.26 (m, 1H), 8.02-8.00 (m, 0.8H), 7.98-7.96 (m, 0.19H), 7.75-7.73 (m, 0.81H), 7.67-7.65 (m, 0.19H), 7.41-7.36 (m, 1H), 7.26-6.94 (m, 14H), 6.65 (d,  $J = 3.1$  Hz, 0.79H), 6.59 (d,  $J = 3.1$  Hz, 0.18H).  $^{13}\text{C}$  NMR ( $\text{CDCl}_3$ , 150 MHz):  $\delta$  160.02, 160.01, 158.40, 158.39, 150.39, 150.35, 147.6, 147.4, 143.5, 142.9, 132.7, 132.6, 132.5, 130.3, 130.2, 130.04, 130.02, 130.01, 130.0, 129.9, 129.8, 129.83, 129.82, 129.7, 129.6, 129.39, 129.38, 129.35, 128.9, 125.57, 125.56, 125.52, 125.51, 125.46, 125.45, 125.14, 125.13, 124.75, 125.74, 122.02, 122.0, 121.9, 121.6, 120.1, 120.09, 120.08, 120.06, 119.9, 119.8, 117.0, 116.7, 115.26, 115.25, 115.11, 115.10, 114.4, 114.2, 103.5, 103.3.  $^{31}\text{P}$  NMR ( $\text{CDCl}_3$ , 162 MHz):  $\delta$  -7.17, -7.36. HRMS (ESI)  $m/z$  calcd for  $\text{C}_{25}\text{H}_{20}\text{FN}_3\text{O}_3\text{P}$  ( $\text{M}+\text{H}$ ) $^+$  460.1221, found 460.1222.

**diphenyl (2-(3-bromo-1H-pyrrolo[2,3-b]pyridin-1-yl)phenyl)phosphoramidate (4aa)**

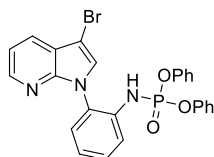

$^1\text{H}$  NMR ( $\text{CDCl}_3$ , 400 MHz):  $\delta$  8.30-8.28 (m, 1H), 7.94-7.92 (m, 1H), 7.79-7.77 (m, 1H), 7.48-7.43 (m, 1H), 7.28-7.15 (m, 9H), 7.11-7.06 (m, 5H), 7.01 (s, 1H).  $^{13}\text{C}$  NMR ( $\text{CDCl}_3$ , 100 MHz):  $\delta$  150.3 (d,  $J = 6.7$  Hz), 146.5, 144.6, 134.0, 130.1 (d,  $J = 10.1$  Hz), 129.7, 129.1, 128.9, 128.1, 127.6, 125.3, 124.8, 123.6 (d,  $J = 1.1$  Hz), 120.9, 120.1 (d,  $J = 4.9$  Hz), 117.4, 91.7.  $^{31}\text{P}$  NMR ( $\text{CDCl}_3$ , 162 MHz):  $\delta$  -7.50. HRMS (ESI)  $m/z$  calcd for  $\text{C}_{25}\text{H}_{20}\text{BrN}_3\text{O}_3\text{P}$  ( $\text{M}+\text{H}$ ) $^+$  520.0420, found 520.0424.

**diphenyl (2-(3-formyl-1H-pyrrolo[2,3-b]pyridin-1-yl)phenyl)phosphoramidate (4ba)**

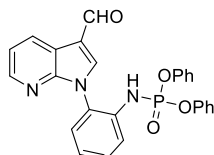

$^1\text{H}$  NMR ( $\text{CDCl}_3$ , 400 MHz):  $\delta$  9.93 (s, 1H), 8.63-8.60 (m, 1H), 8.35-8.33 (m, 1H), 7.80 (d,  $J = 8.1$  Hz, 1H), 7.55-7.51 (m, 2H), 7.28-7.23 (m, 7H), 7.17-7.14 (m, 2H), 7.08-7.06 (m, 4H), 6.89-6.86 (m, 1H).  $^{13}\text{C}$  NMR ( $\text{CDCl}_3$ , 100 MHz):  $\delta$  184.8, 150.2 (d,  $J = 6.7$  Hz), 148.5, 145.6, 138.9, 134.3 (d,  $J = 1.8$  Hz), 131.8, 130.0, 129.8, 129.7, 127.6, 125.4, 125.1, 124.0 (d,  $J = 1.2$  Hz), 120.1 (d,  $J = 4.9$  Hz), 119.6, 118.4, 117.9.  $^{31}\text{P}$  NMR ( $\text{CDCl}_3$ , 162 MHz):  $\delta$  -7.68. HRMS (ESI)  $m/z$  calcd for  $\text{C}_{26}\text{H}_{21}\text{N}_3\text{O}_4\text{P}$  ( $\text{M}+\text{H}$ ) $^+$  470.1264, found 470.1261.

**diphenyl (2-(3-acetyl-1H-pyrrolo[2,3-b]pyridin-1-yl)phenyl)phosphoramidate (4ca)**

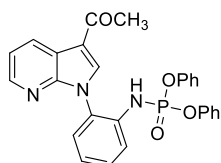

$^1\text{H}$  NMR ( $\text{CDCl}_3$ , 400 MHz):  $\delta$  8.72-8.69 (m, 1H), 8.32-8.31 (m, 1H), 7.79 (d,  $J = 8.1$  Hz, 1H), 7.57 (s, 1H), 7.53-7.49 (m, 1H), 7.36-7.22 (m, 7H), 7.16-7.12 (m, 2H), 7.07-7.05 (m, 4H), 6.94-6.91 (m, 1H), 2.48 (s, 3H).  $^{13}\text{C}$  NMR ( $\text{CDCl}_3$ , 100 MHz):  $\delta$  192.9, 150.3 (d,  $J = 6.6$  Hz), 148.1, 145.1, 135.1, 134.4, 132.4, 130.1 (d,  $J = 9.8$  Hz), 129.8, 129.7, 127.6, 125.3, 124.1, 120.4 (d,  $J = 4.9$  Hz), 120.1 (d,  $J = 6.7$  Hz), 119.3, 119.1, 117.7, 27.2.  $^{31}\text{P}$  NMR ( $\text{CDCl}_3$ , 162 MHz):  $\delta$  -7.62. HRMS (ESI)  $m/z$  calcd for  $\text{C}_{27}\text{H}_{23}\text{N}_3\text{O}_4\text{P}$  ( $\text{M}+\text{H}$ ) $^+$  484.1421, found 484.1423.

**diphenyl (2-(4-chloro-1H-pyrrolo[2,3-b]pyridin-1-yl)phenyl)phosphoramidate (4da)**

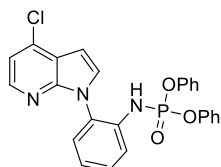

$^1\text{H}$  NMR ( $\text{CDCl}_3$ , 400 MHz):  $\delta$  8.14-8.13 (m, 1H), 7.79-7.77 (m, 1H), 7.49-7.44 (m, 1H), 7.28-7.23 (m, 6H), 7.17-7.09 (m, 8H), 6.96-6.93 (m, 1H), 6.71 (d,  $J = 3.6$  Hz, 1H).  $^{13}\text{C}$  NMR ( $\text{CDCl}_3$ , 100 MHz):  $\delta$  150.3 (d,  $J = 6.7$  Hz), 148.0, 143.8, 137.2, 134.1, 130.3 (d,  $J = 10.3$  Hz), 129.8, 129.7, 129.3, 129.1, 127.7, 125.3, 124.7, 123.3 (d,  $J = 1.1$  Hz), 120.7, 120.1 (d,  $J = 4.9$  Hz), 116.9, 101.2.  $^{31}\text{P}$  NMR ( $\text{CDCl}_3$ , 162 MHz):  $\delta$  -7.51. HRMS (ESI)  $m/z$  calcd for  $\text{C}_{25}\text{H}_{20}\text{ClN}_3\text{O}_3\text{P}$  ( $\text{M}+\text{H}$ ) $^+$  476.0925, found 476.0928.

**diphenyl (2-(5-bromo-1H-pyrrolo[2,3-b]pyridin-1-yl)phenyl)phosphoramidate (4ea)**

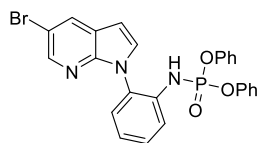

$^1\text{H}$  NMR ( $\text{CDCl}_3$ , 400 MHz):  $\delta$  8.25-8.24 (m, 1H), 8.09-8.08 (m, 1H), 7.80-7.78 (m, 1H), 7.49-7.44 (m, 1H), 7.30-7.22 (m, 6H), 7.19-7.07 (m, 7H), 6.71-6.67 (m, 1H), 6.56 (d,  $J = 3.6$  Hz, 1H).  $^{13}\text{C}$  NMR ( $\text{CDCl}_3$ , 100 MHz):  $\delta$  150.3 (d,  $J = 6.8$  Hz), 146.0, 144.0, 134.3 (d,  $J = 1.7$  Hz), 131.9, 130.8, 129.9, 129.8, 129.2, 127.8, 125.4, 124.5, 122.9, 122.7 (d,  $J = 1.1$  Hz), 120.2 (d,  $J = 4.7$  Hz), 112.7, 102.2.  $^{31}\text{P}$  NMR ( $\text{CDCl}_3$ , 162 MHz):  $\delta$  -7.63. HRMS (ESI)  $m/z$  calcd for  $\text{C}_{25}\text{H}_{20}\text{BrN}_3\text{O}_3\text{P}$  ( $\text{M}+\text{H}$ ) $^+$  520.0420, found 520.0424.

**di-*m*-tolyl (2-(1H-pyrrolo[2,3-b]pyridin-1-yl)phenyl)phosphoramidate (4ab)**

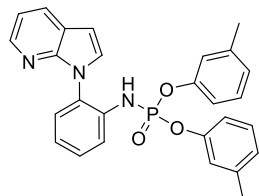

$^1\text{H}$  NMR ( $\text{CDCl}_3$ , 400 MHz):  $\delta$  8.31-8.29 (m, 1H), 8.01-7.99 (m, 1H), 7.82 (d,  $J = 8.2$  Hz, 1H), 7.48-7.43 (m, 1H), 7.28-7.21 (m, 2H), 7.18-7.09 (m, 5H), 6.96-6.88 (m, 6H), 6.63 (d,  $J = 3.6$  Hz, 1H), 2.29 (s, 6H).  $^{13}\text{C}$  NMR ( $\text{CDCl}_3$ , 100 MHz):  $\delta$  150.3 (d,  $J = 6.7$  Hz), 147.7, 143.5, 139.9, 134.3, 130.6 (d,  $J = 10.6$  Hz), 130.0, 129.3, 128.7, 127.6, 125.9, 124.4, 123.0, 121.5, 120.8 (d,  $J =$

4.8 Hz), 117.1 (d,  $J = 4.9$  Hz), 116.8, 102.8, 21.3.  $^{31}\text{P}$  NMR ( $\text{CDCl}_3$ , 162 MHz):  $\delta -7.37$ . HRMS (ESI)  $m/z$  calcd for  $\text{C}_{27}\text{H}_{25}\text{N}_3\text{O}_3\text{P}$  ( $\text{M}+\text{H}$ ) $^+$  470.1628, found 470.1630.

**dipropyl (2-(1H-pyrrolo[2,3-b]pyridin-1-yl)phenyl)phosphoramidate (4ac)**

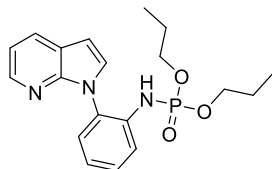

$^1\text{H}$  NMR ( $\text{CDCl}_3$ , 400 MHz):  $\delta$  8.34-8.32 (m, 1H), 8.04-8.01 (m, 1H), 7.55-7.53 (m, 1H), 7.41-7.37 (m, 1H), 7.33-7.31 (m, 1H), 7.28-7.25 (m, 1H), 7.18-7.12 (m, 2H), 6.71 (d,  $J = 3.6$  Hz, 1H), 6.00-5.98 (m, 1H), 4.02-3.87 (m, 4H), 1.68-1.59 (m, 4H), 0.88 (t,  $J = 7.4$  Hz, 6H).  $^{13}\text{C}$  NMR ( $\text{CDCl}_3$ , 100 MHz):  $\delta$  147.9, 143.8, 135.8, 129.9, 129.2, 129.0, 128.7, 128.1, 123.0, 121.2, 120.6, 116.8, 102.7, 68.5, 68.4, 23.6, 23.5, 10.0.  $^{31}\text{P}$  NMR ( $\text{CDCl}_3$ , 162 MHz):  $\delta$  2.11. HRMS (ESI)  $m/z$  calcd for  $\text{C}_{19}\text{H}_{25}\text{N}_3\text{O}_3\text{P}$  ( $\text{M}+\text{H}$ ) $^+$  374.1628, found 374.1627.

**N-(2-(1H-pyrrolo[2,3-b]pyridin-1-yl)phenyl)-4-methylbenzenesulfonamide (4ad)<sup>1</sup>**

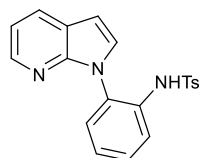

$^1\text{H}$  NMR ( $\text{CDCl}_3$ , 600 MHz):  $\delta$  9.37 (s, 1H), 8.40-8.39 (m, 1H), 8.01-7.99 (m, 1H), 7.82-7.80 (m, 1H), 7.46-7.43 (m, 1H), 7.36-7.33 (m, 1H), 7.23-7.21 (m, 1H), 7.13 (d,  $J = 7.9$  Hz, 1H), 6.97 (d,  $J = 8.2$  Hz, 2H), 6.89 (d,  $J = 8.1$  Hz, 2H), 6.67 (d,  $J = 3.6$  Hz, 1H), 6.47 (d,  $J = 3.6$  Hz, 1H), 2.32 (s, 3H).  $^{13}\text{C}$  NMR ( $\text{CDCl}_3$ , 150 MHz):  $\delta$  146.8, 143.4, 142.8, 136.8, 130.8, 130.2, 129.9, 129.1, 128.9, 128.1, 127.7, 126.4, 126.0, 121.6, 116.9, 102.7, 21.4.

<sup>1</sup> M. Jeon, J. Park, P. Dey, Y. Oh, H. Oh, S. Han, S. H. Um, H. S. Kim, N. K. Mishra and I. S. Kim, *Adv. Synth. Catal.*, 2017, **359**, 3471.

#### 4. Copies of $^1\text{H}$ NMR and $^{13}\text{C}$ NMR spectra of the products

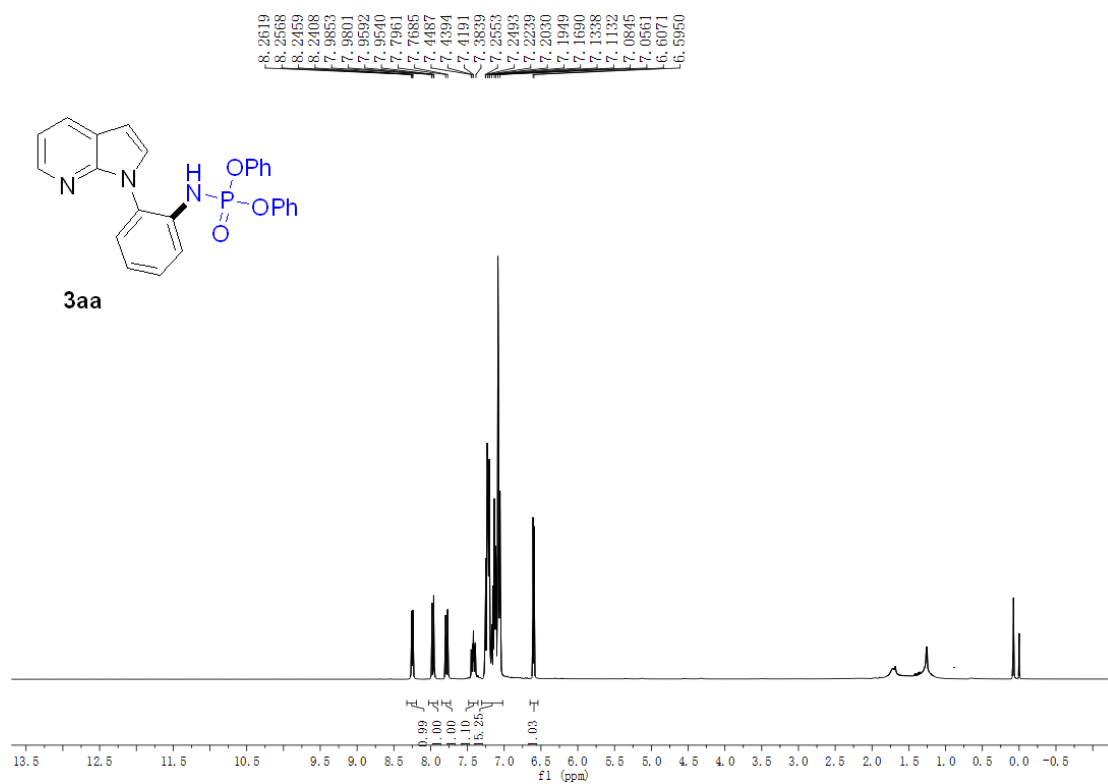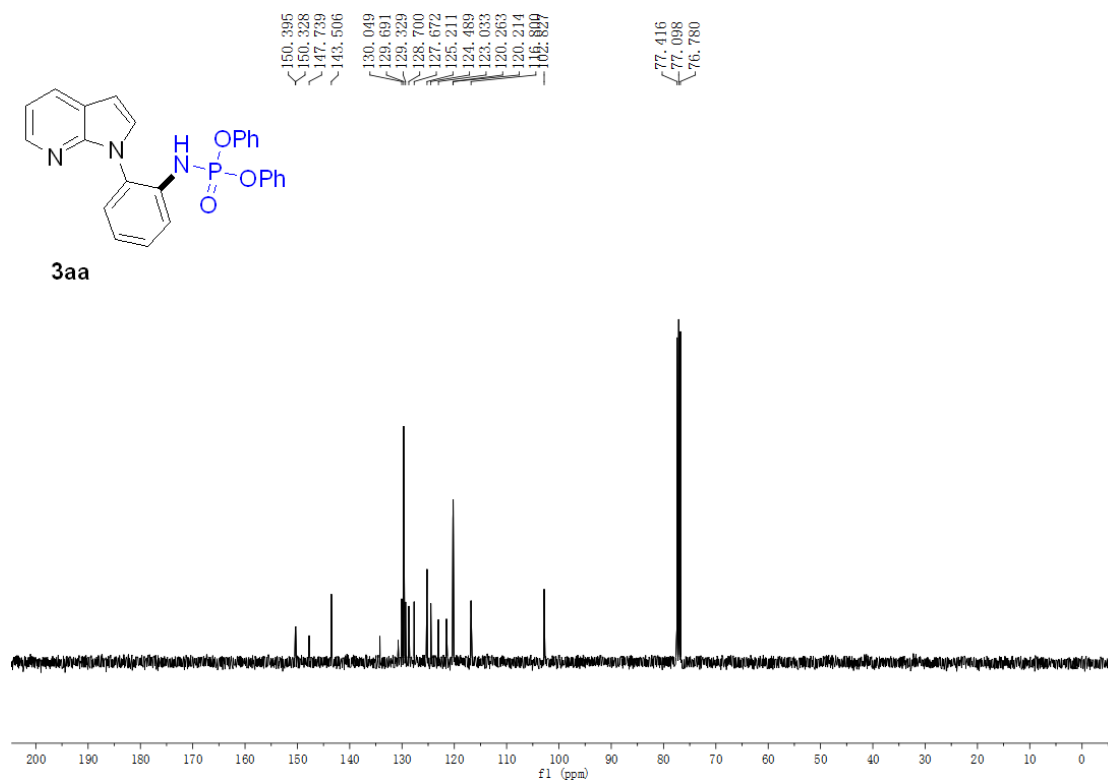

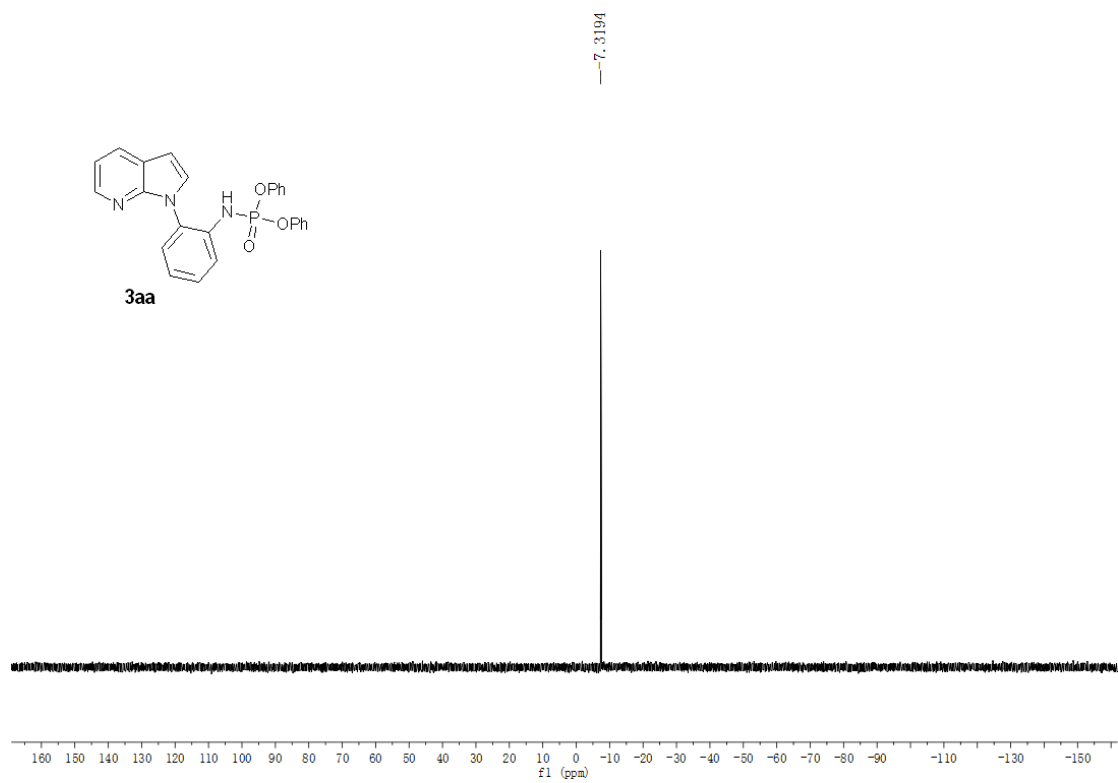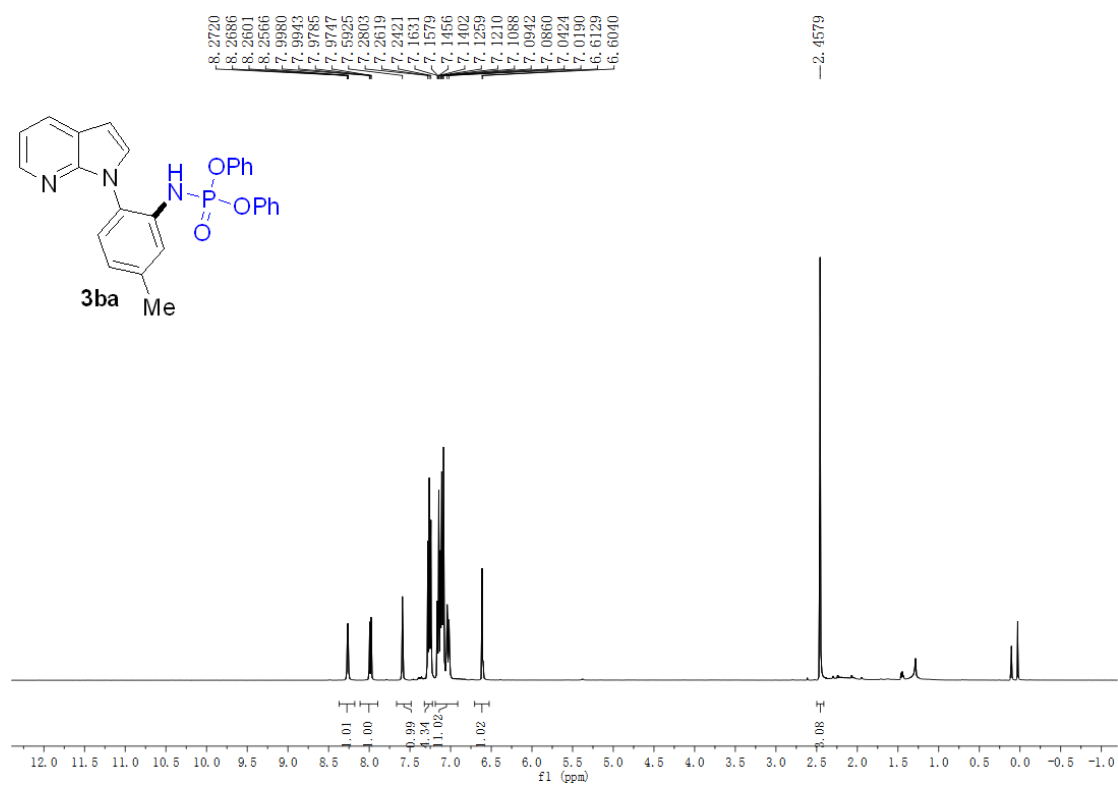

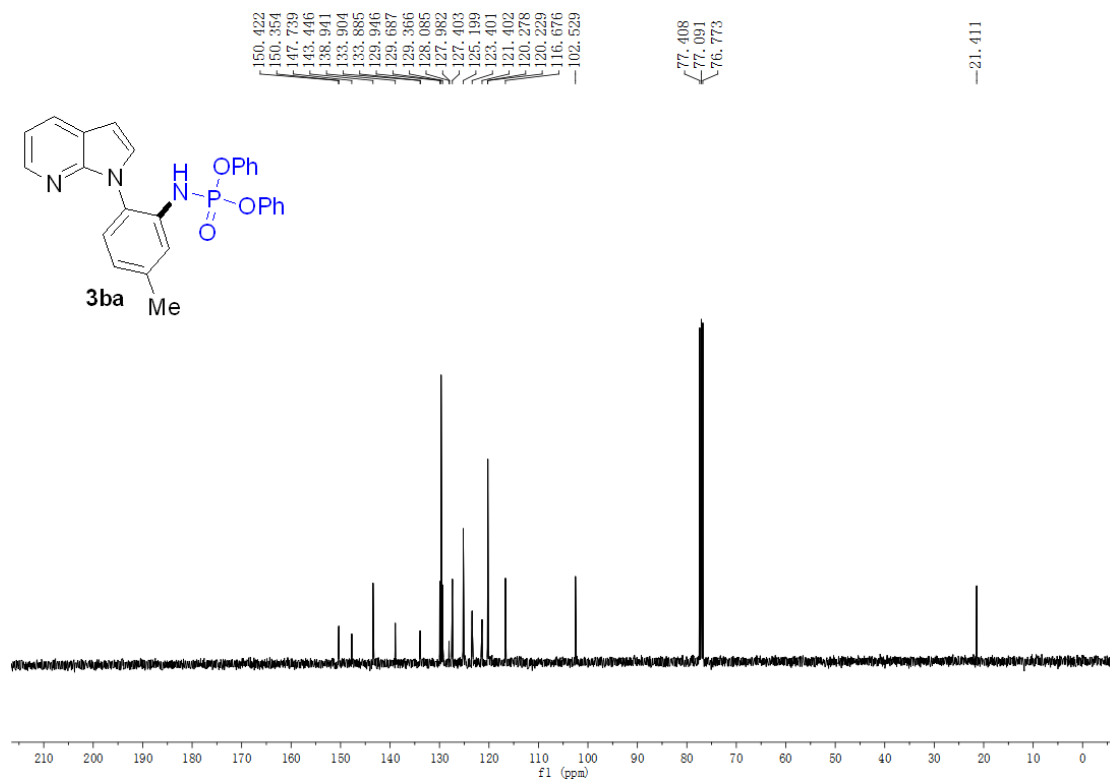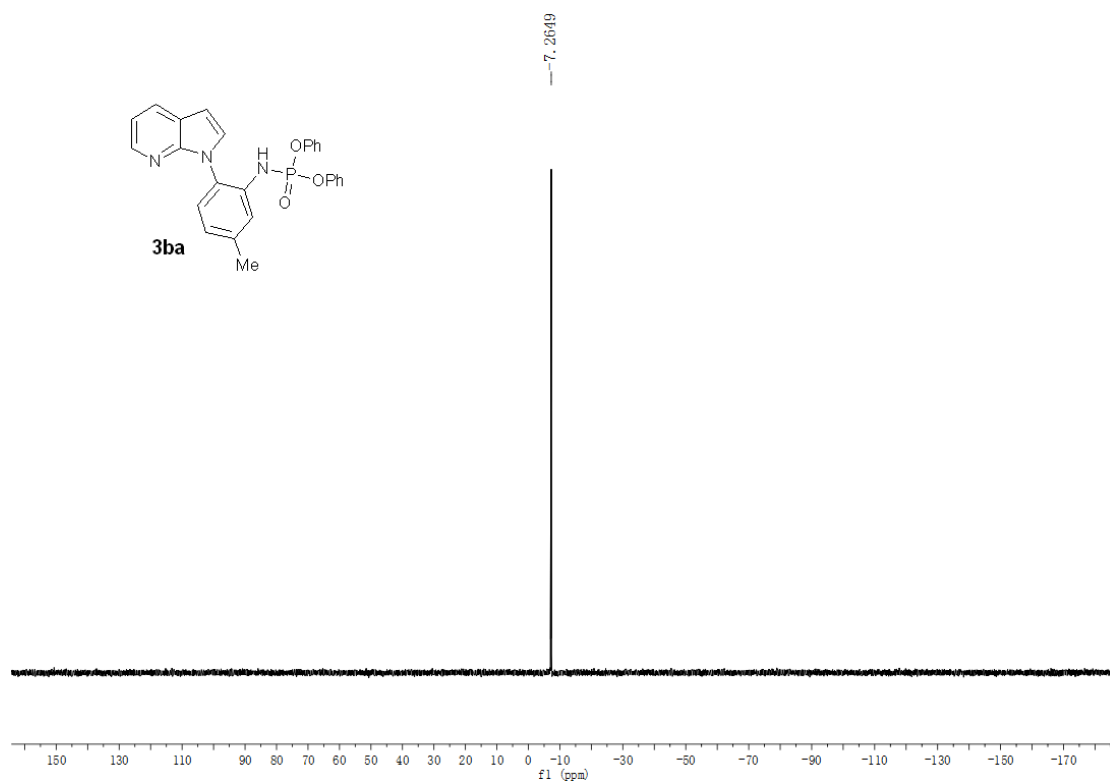

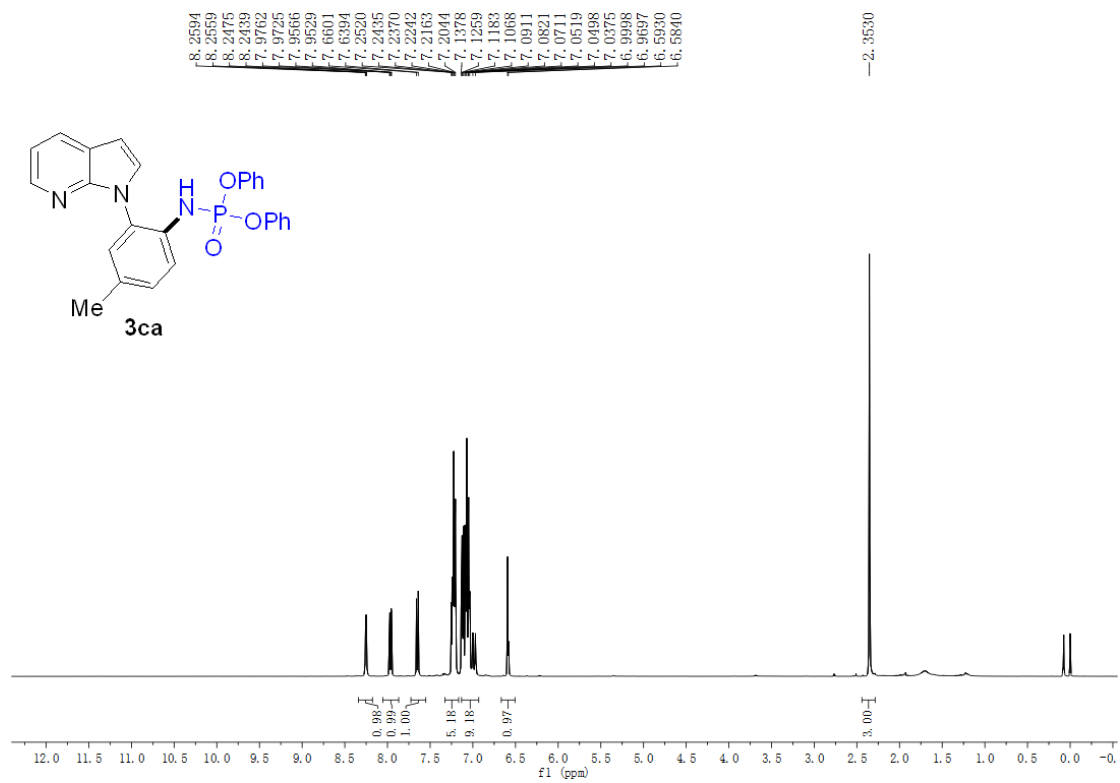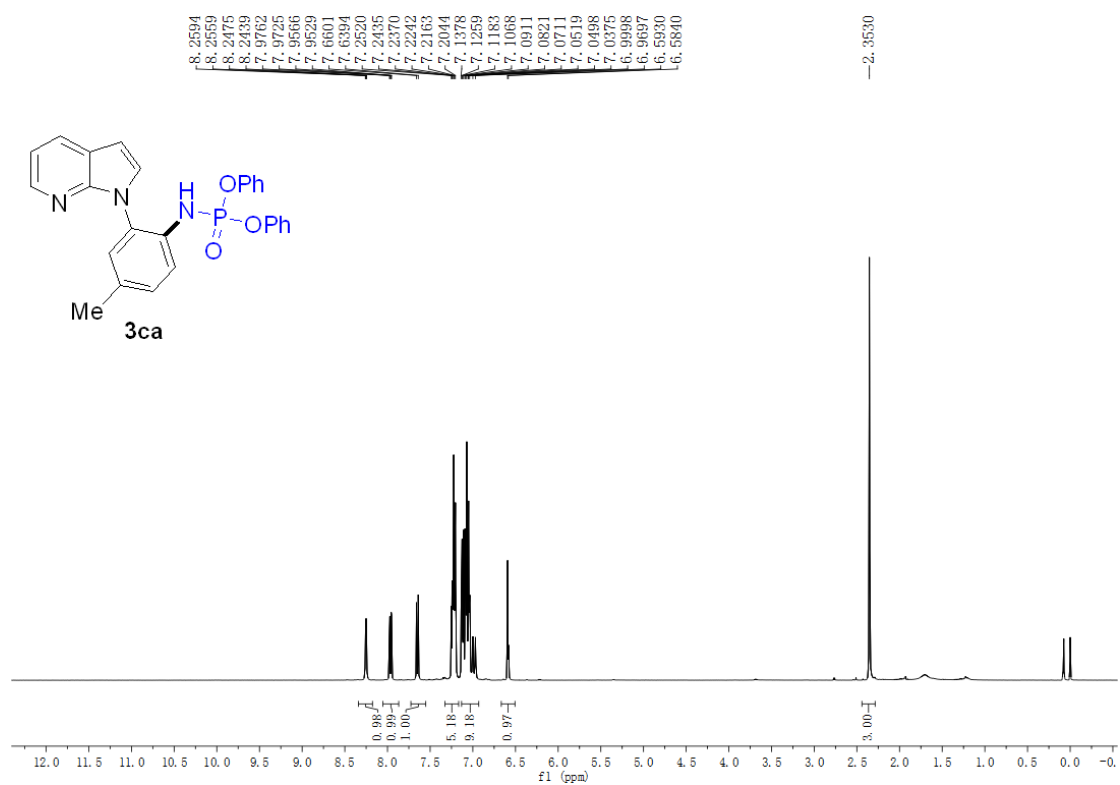

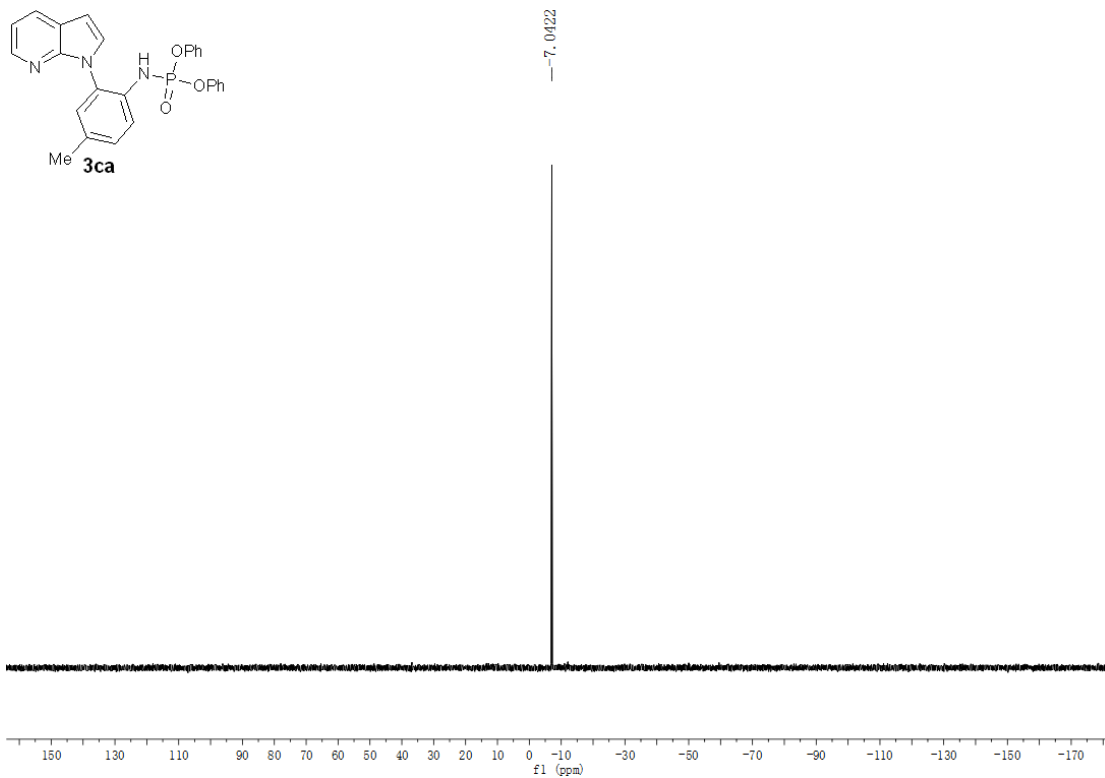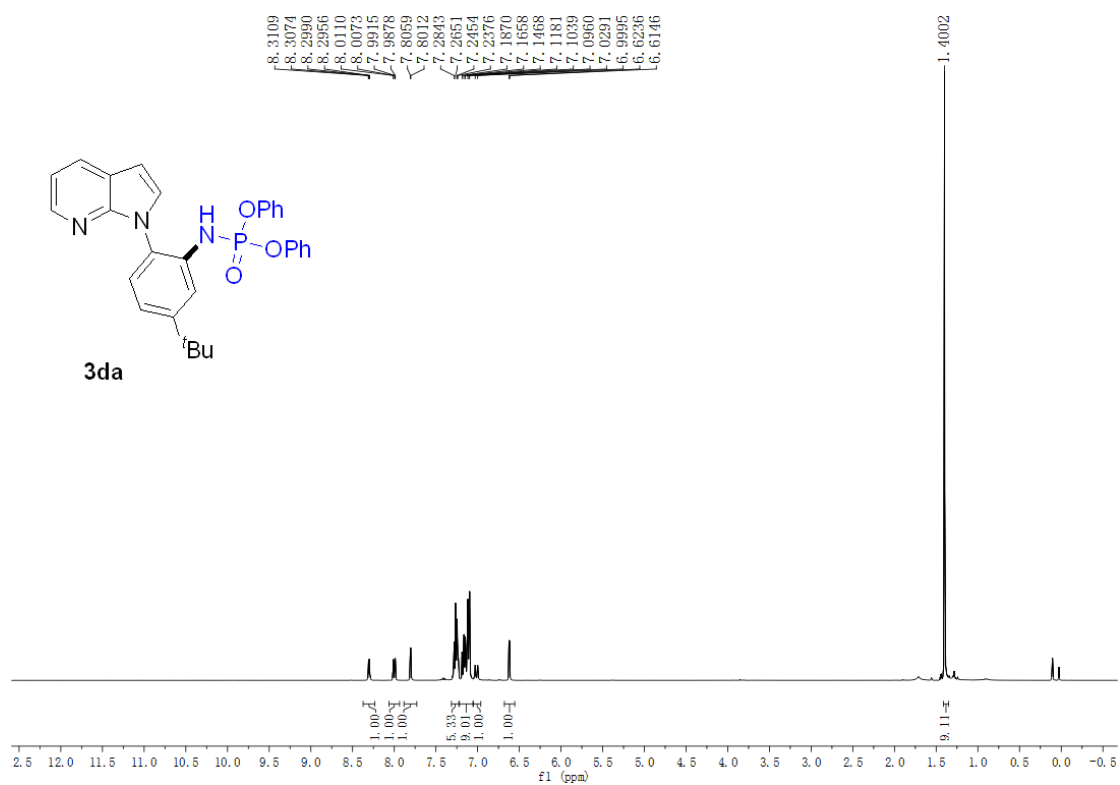



2018.1.19-400M  
4chengj56/pcd-36-4

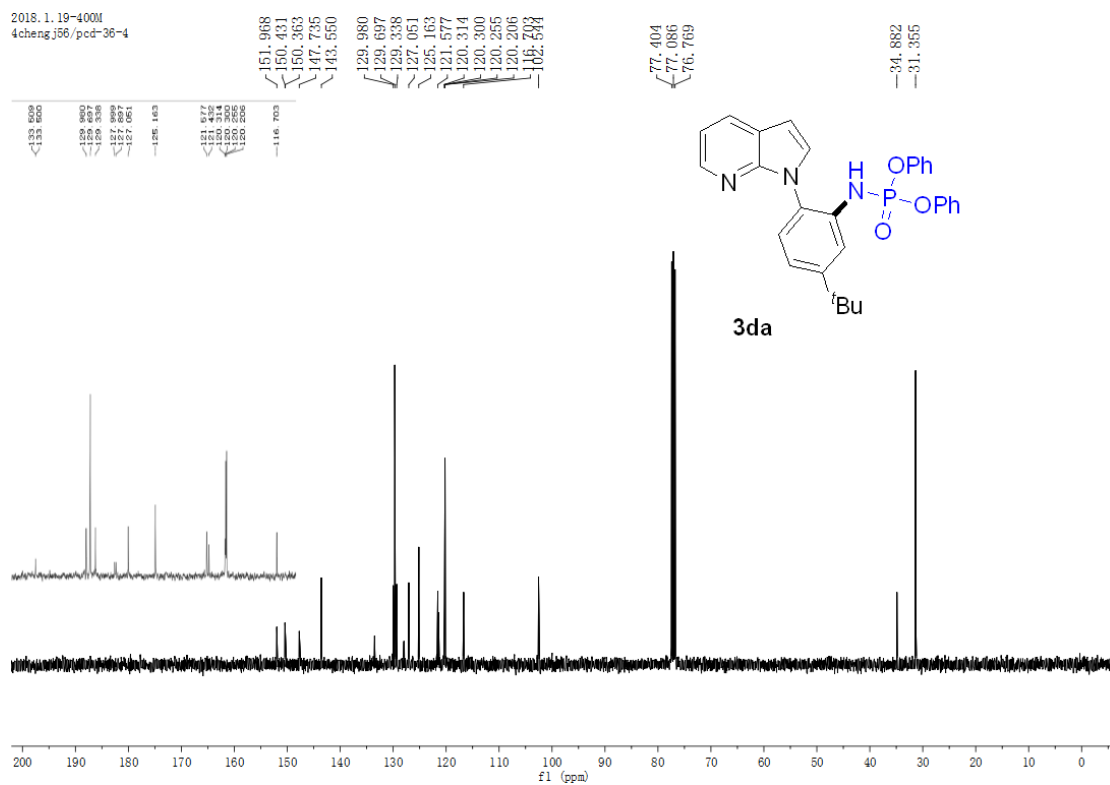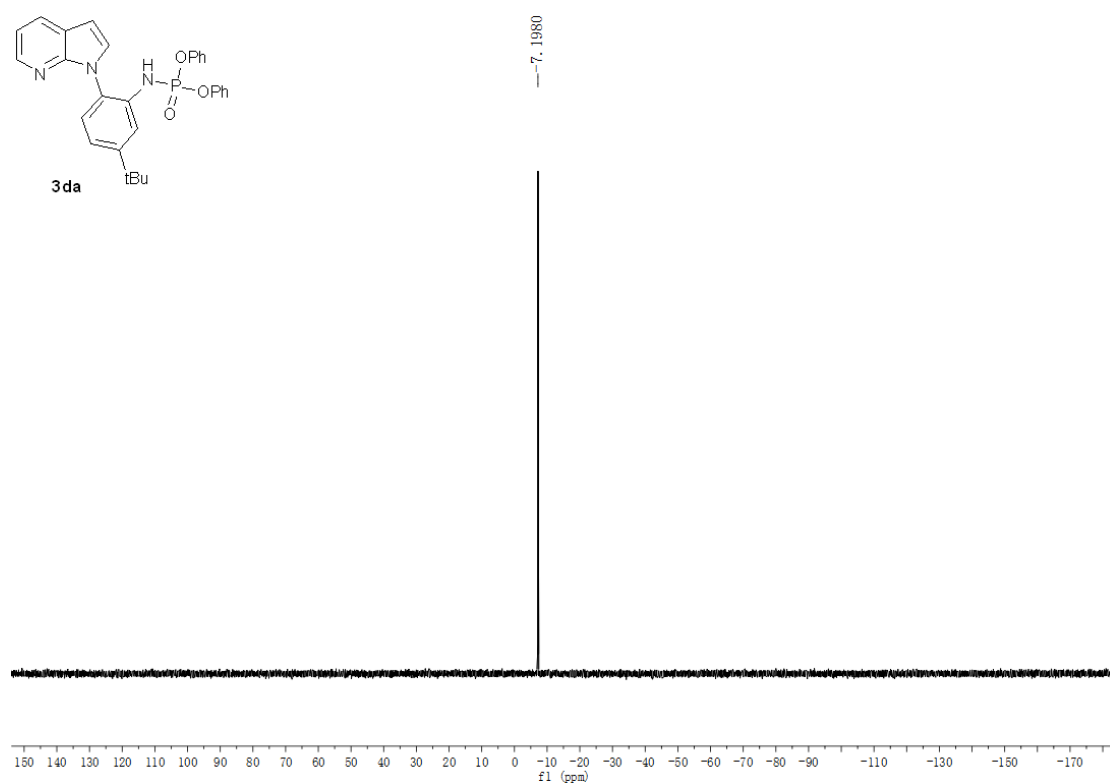

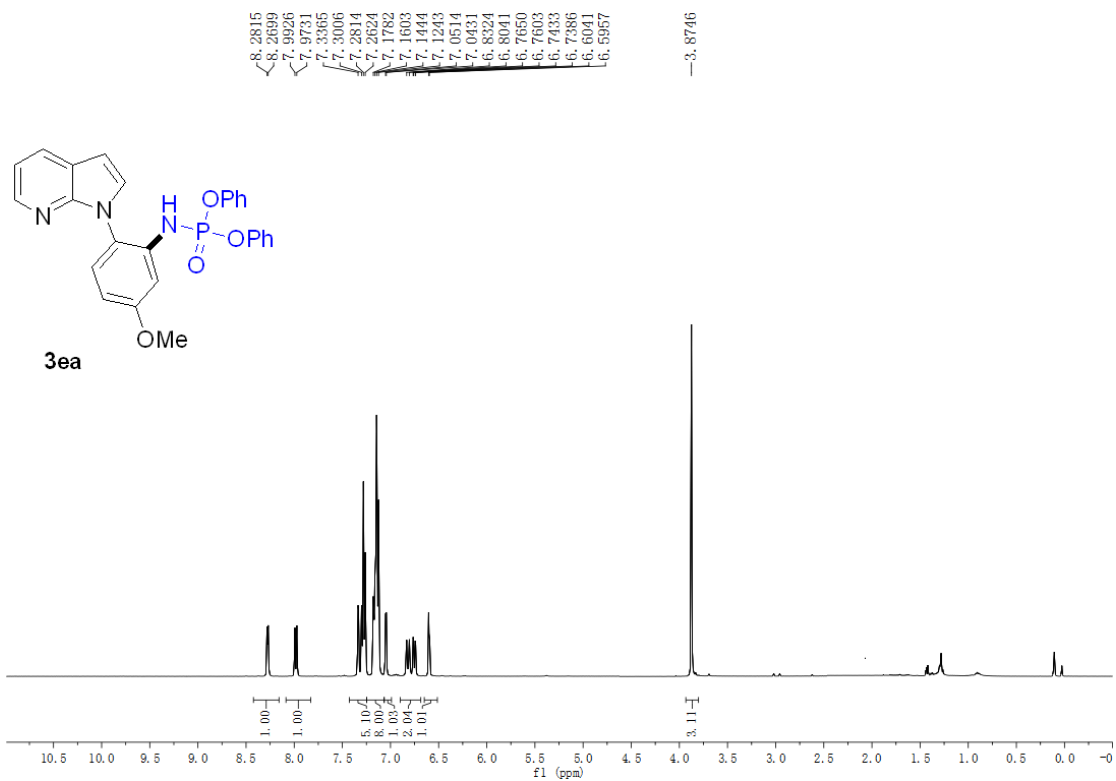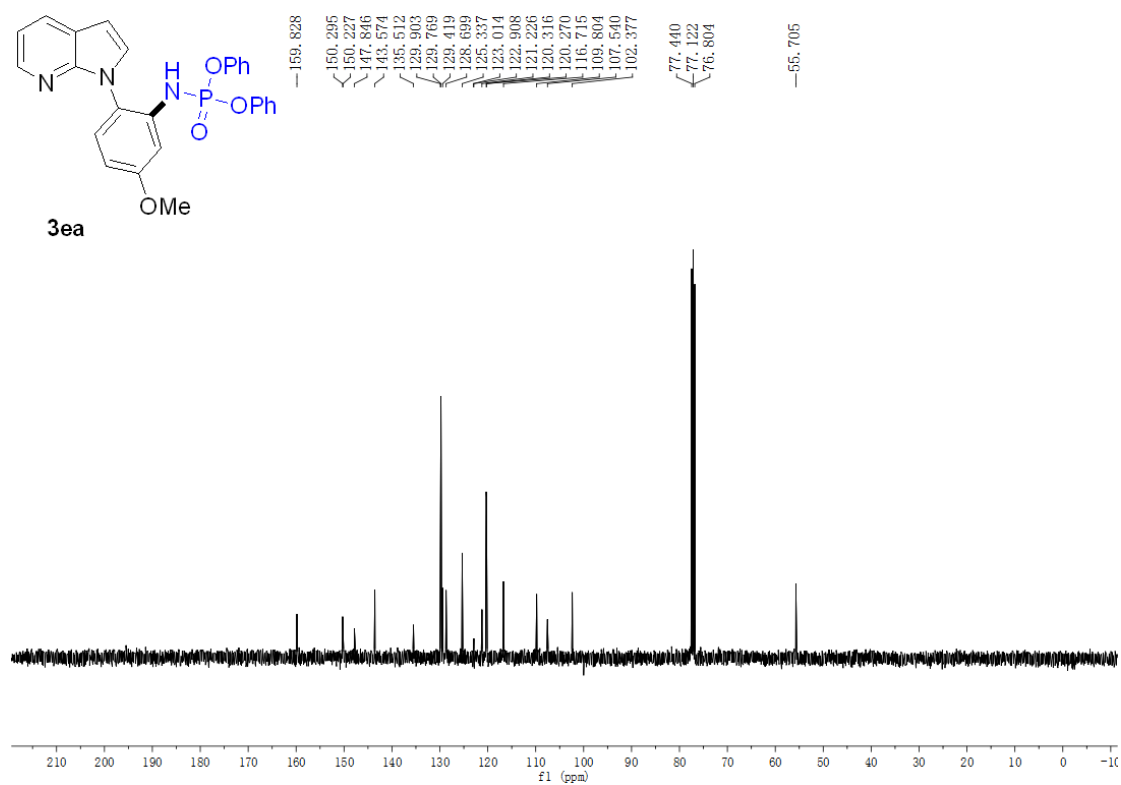

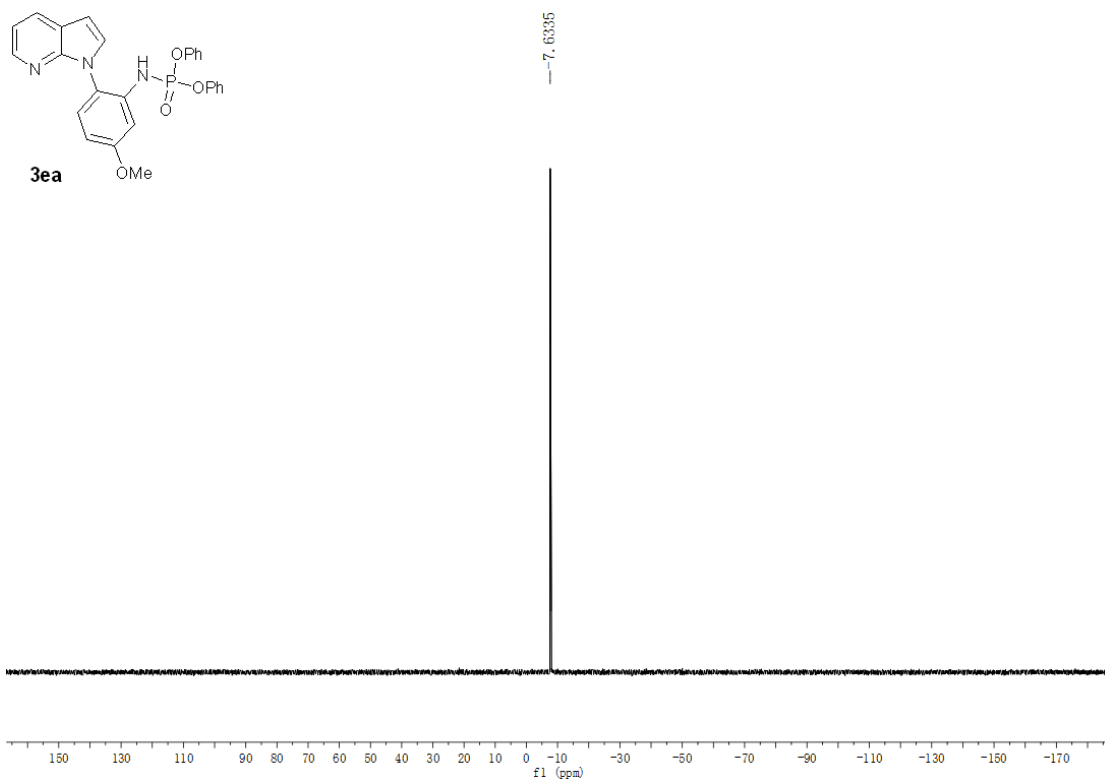

8.2849  
8.2822  
8.2731  
8.2704  
8.0170  
8.0142  
7.9974  
7.9946  
7.7020  
7.6976  
7.3937  
7.2839  
7.2645  
7.2536  
7.1889  
7.1789  
7.1701  
7.1594  
7.1509  
7.1352  
7.1141  
7.0823  
7.0721  
7.0632  
6.6595  
6.6504

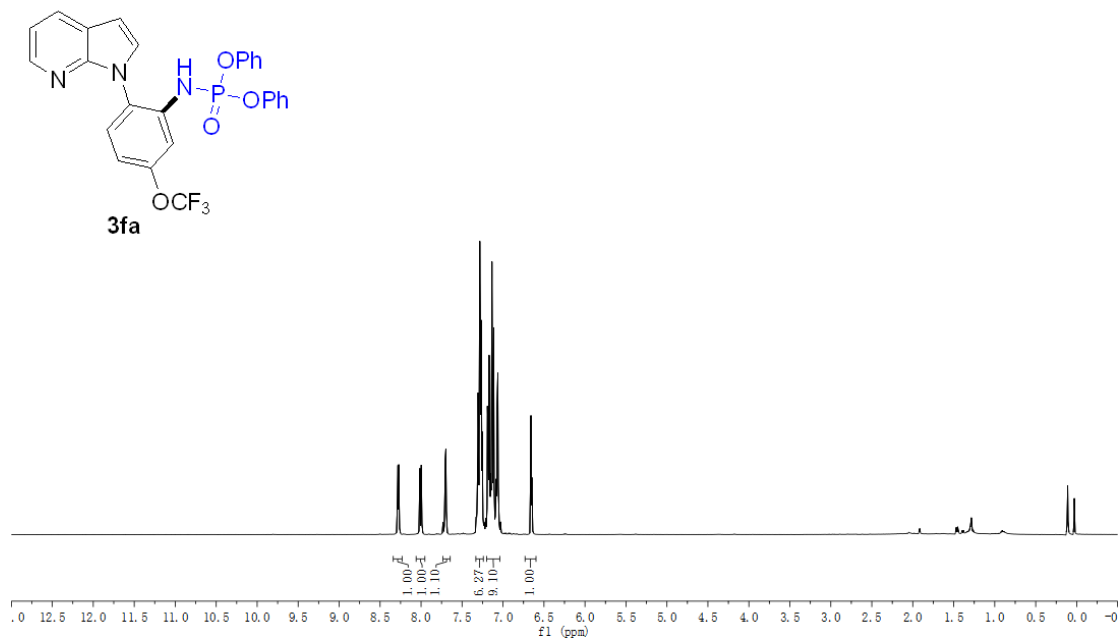

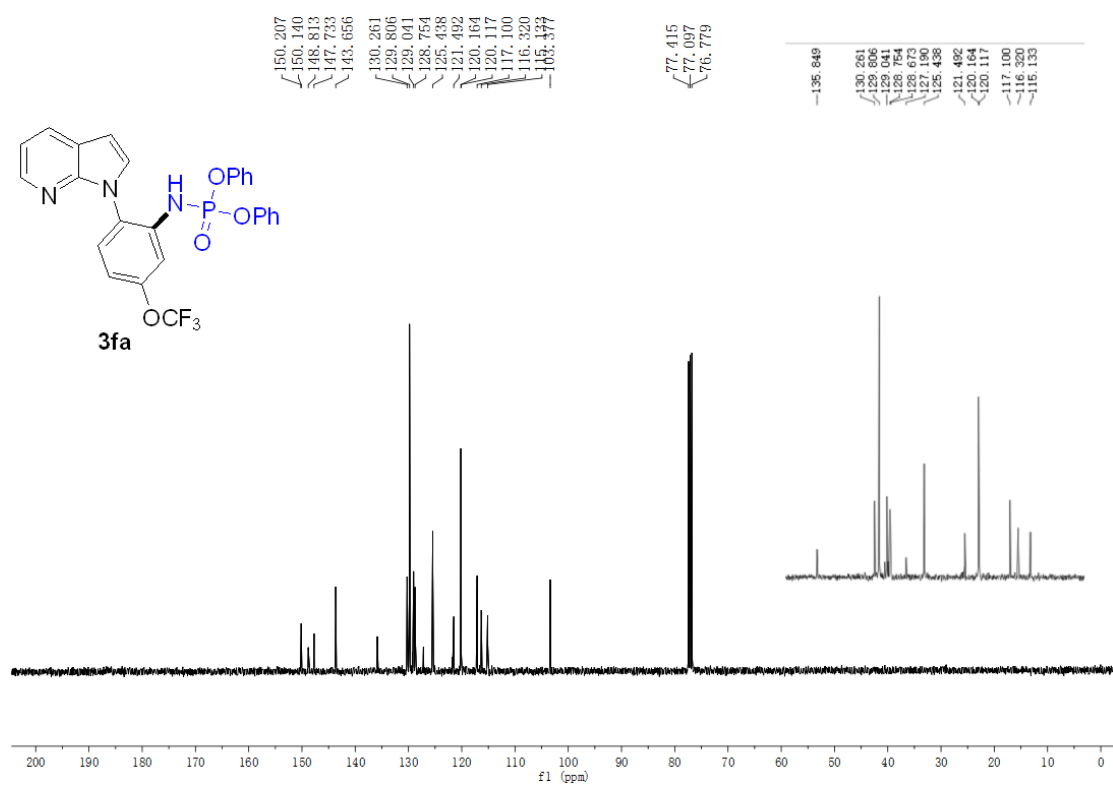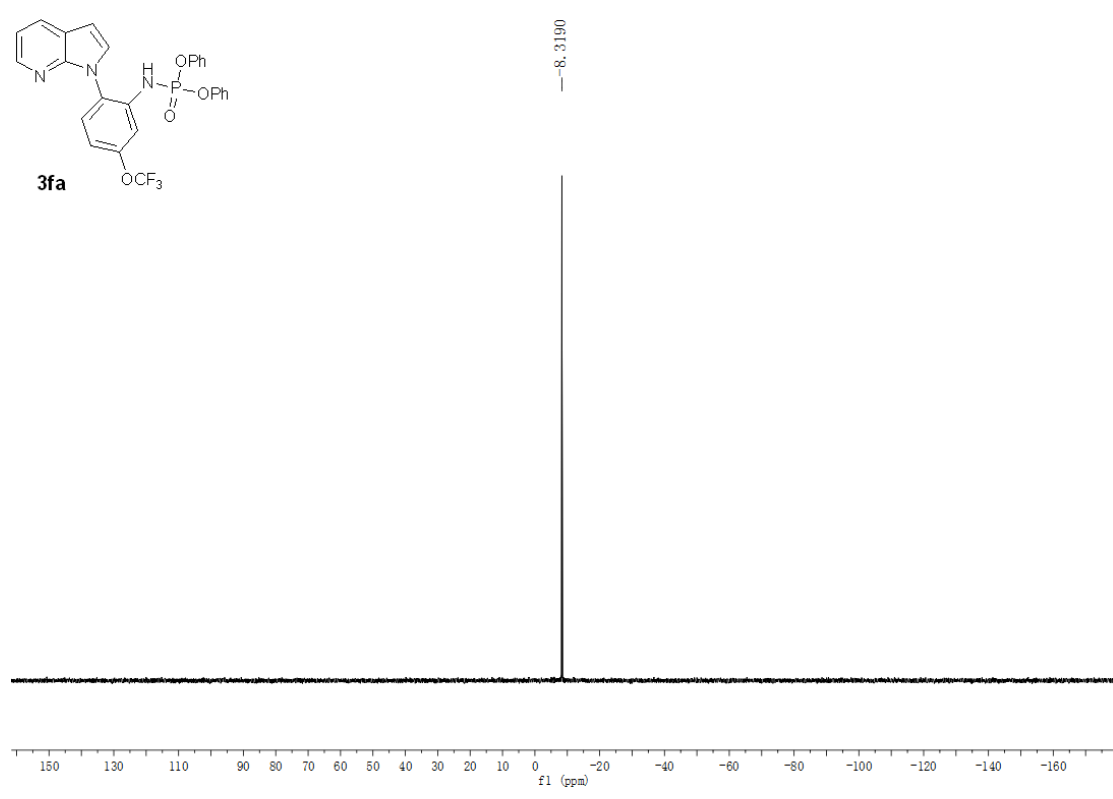

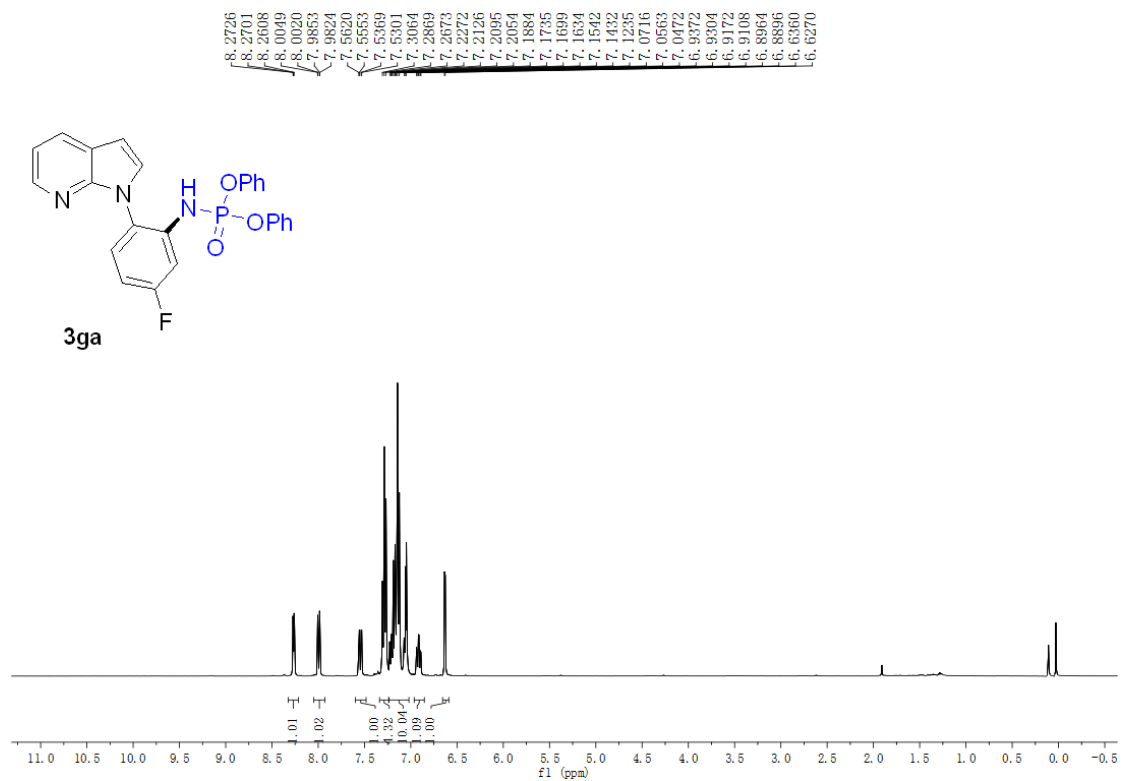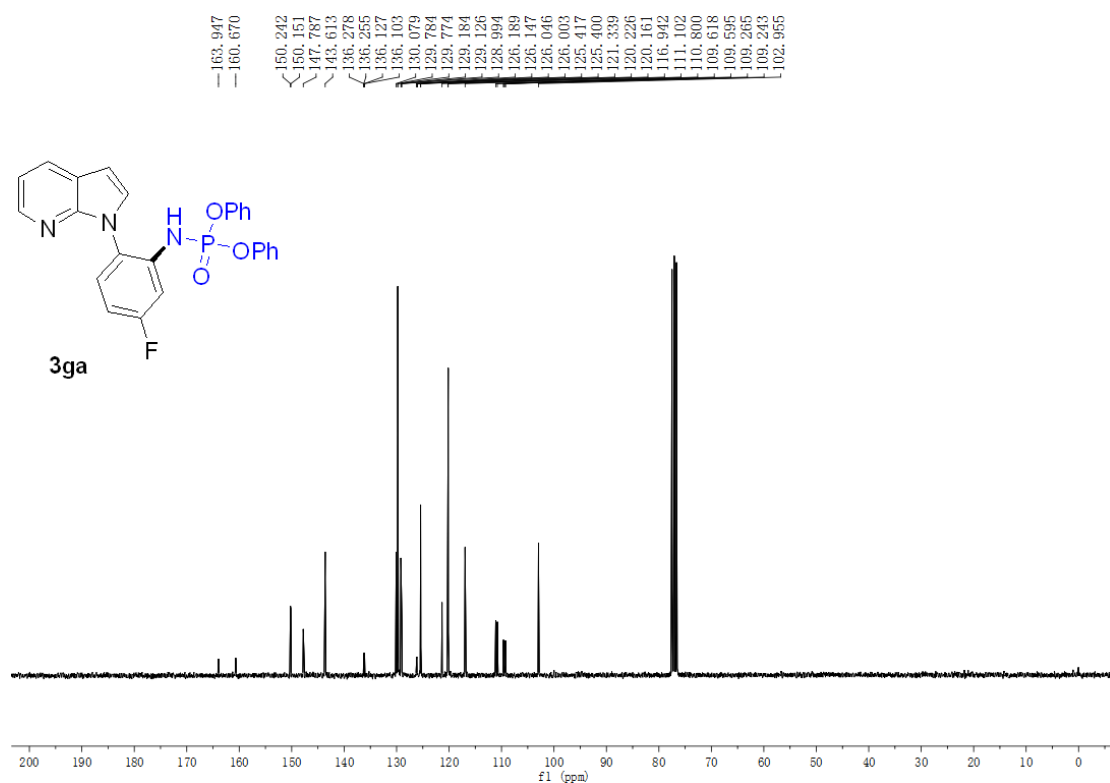

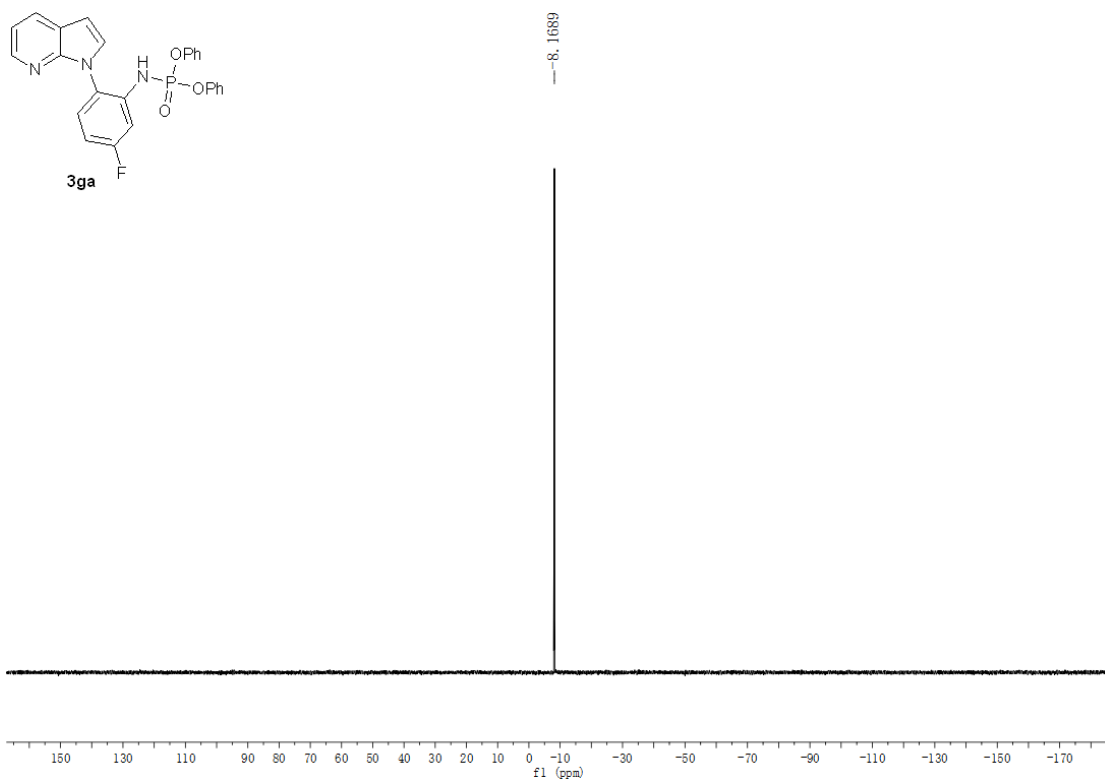

8.2638  
8.2611  
8.2520  
8.2493  
7.9996  
7.9966  
7.9800  
7.9770  
7.8006  
7.7978  
7.7347  
7.7295  
7.7273  
7.7573  
7.7010  
7.1864  
7.1793  
7.1737  
7.1620  
7.1430  
7.1268  
7.1068  
7.0626  
7.0536  
6.6372  
6.6282

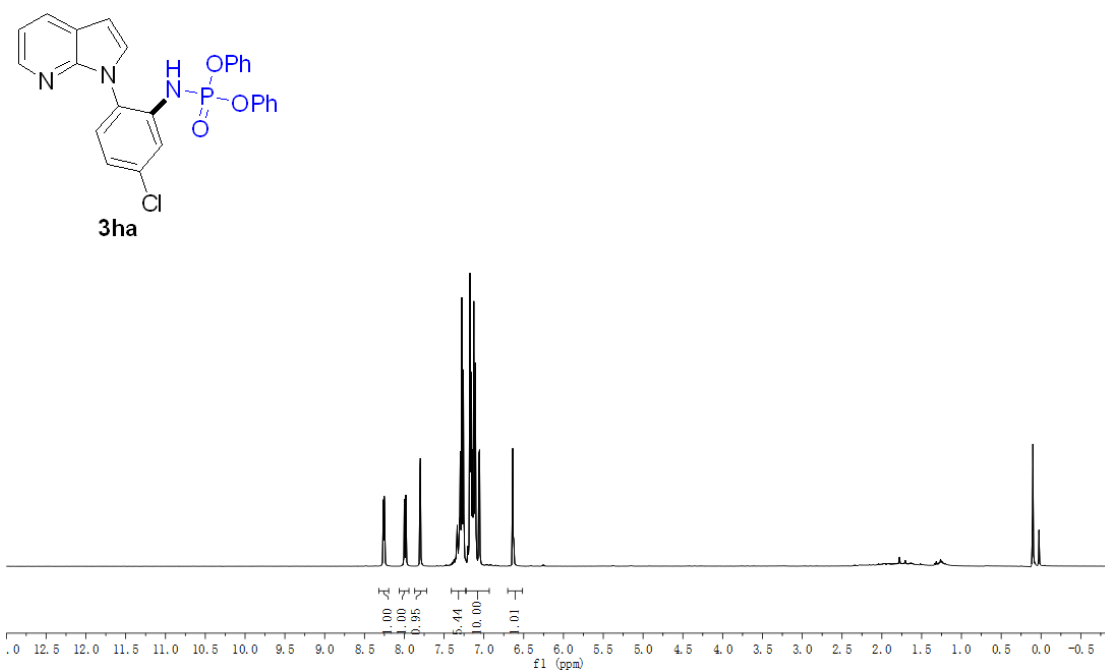

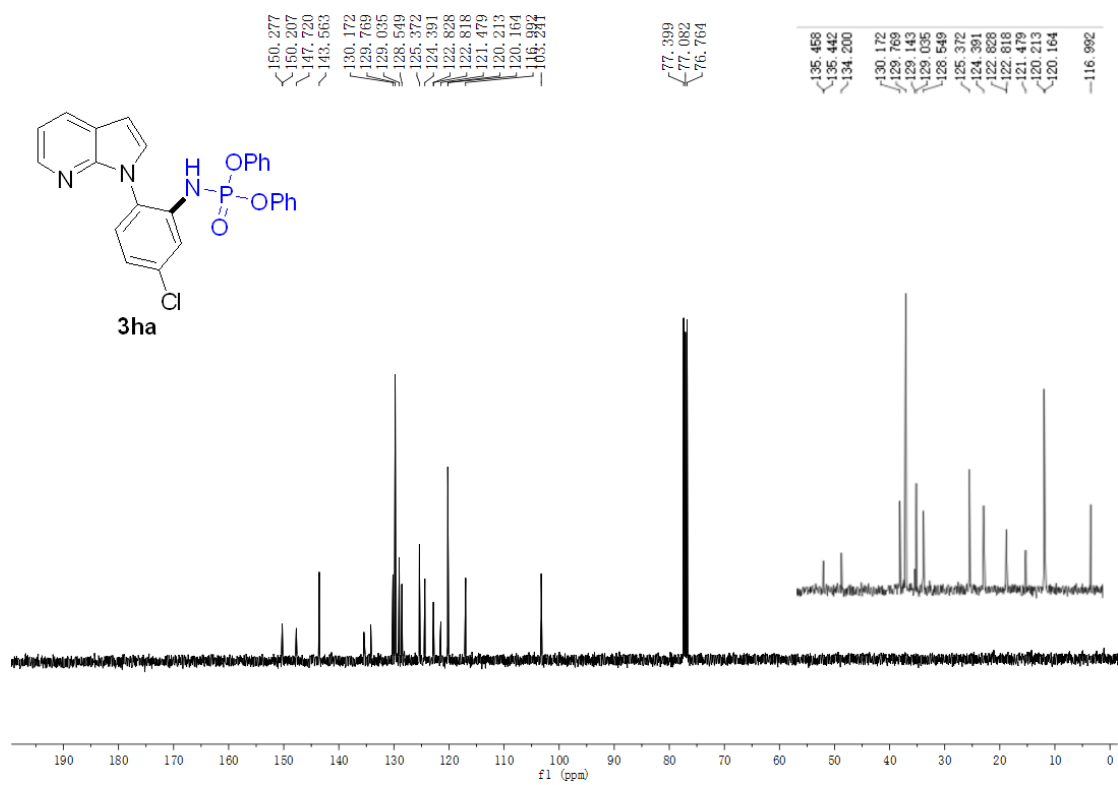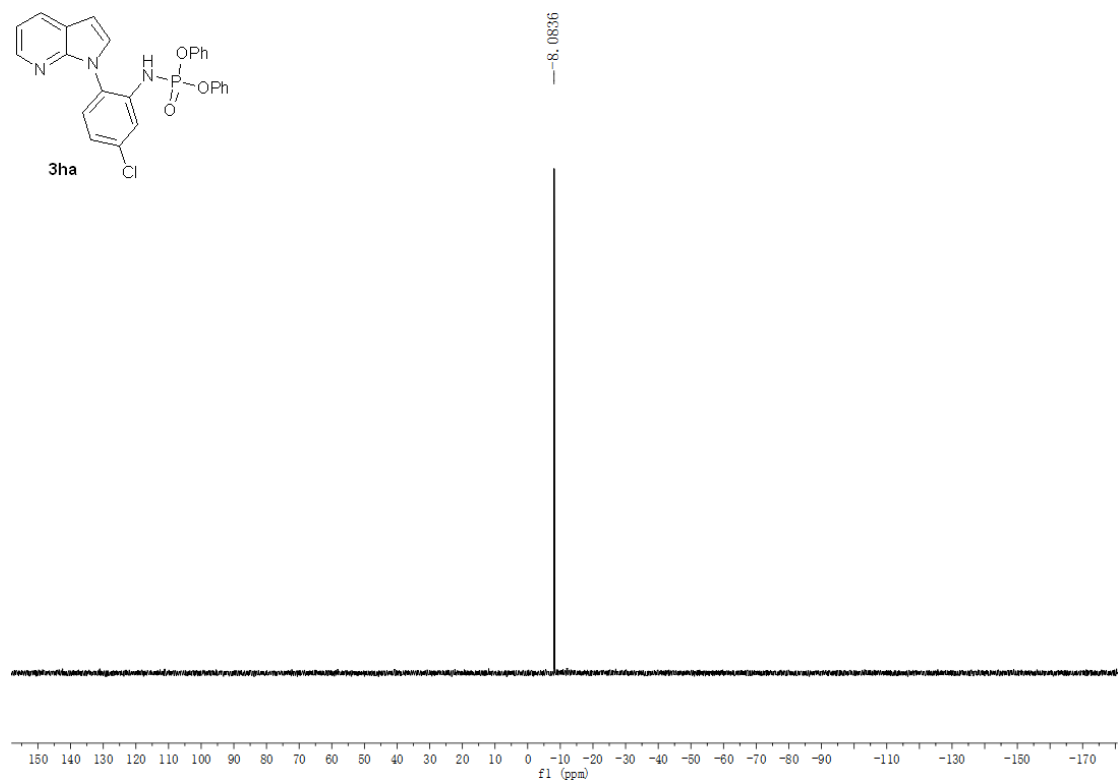

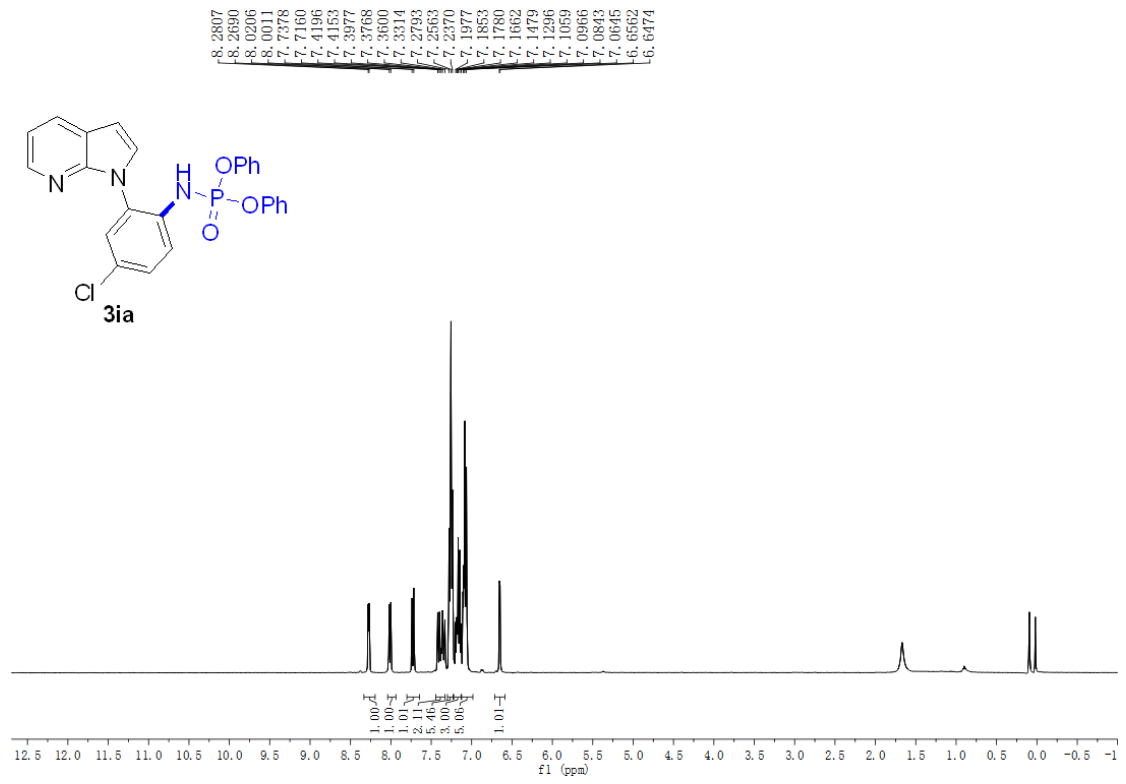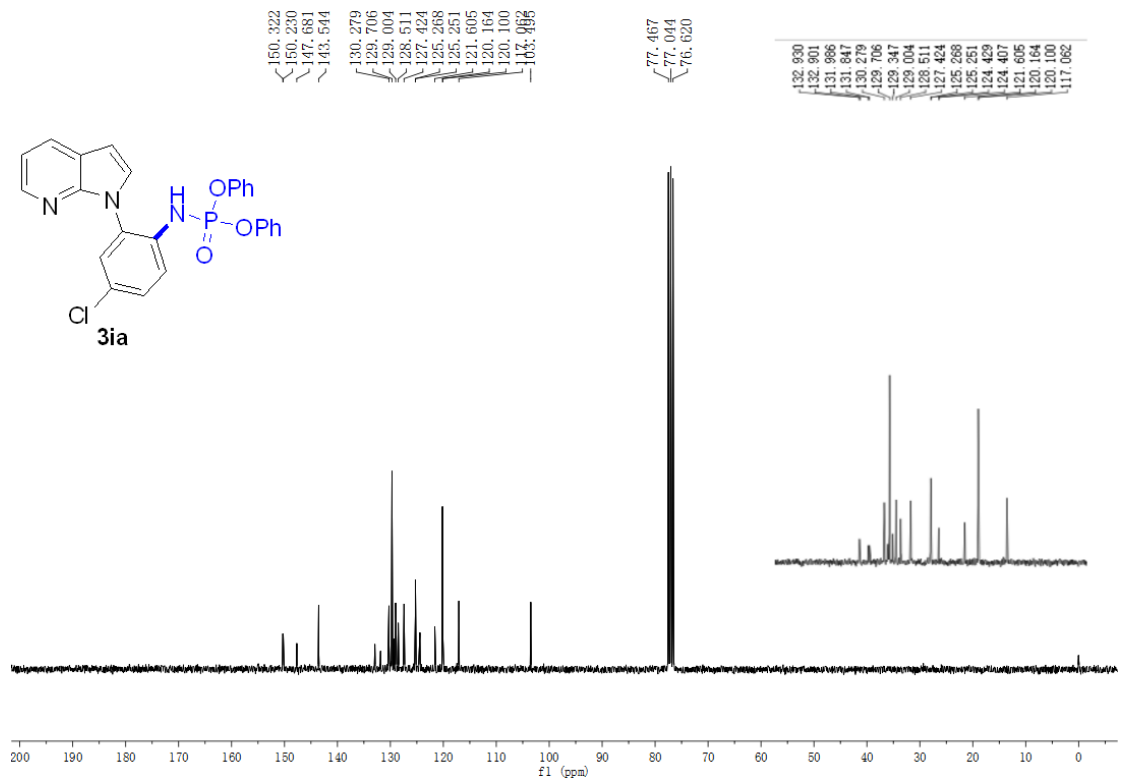



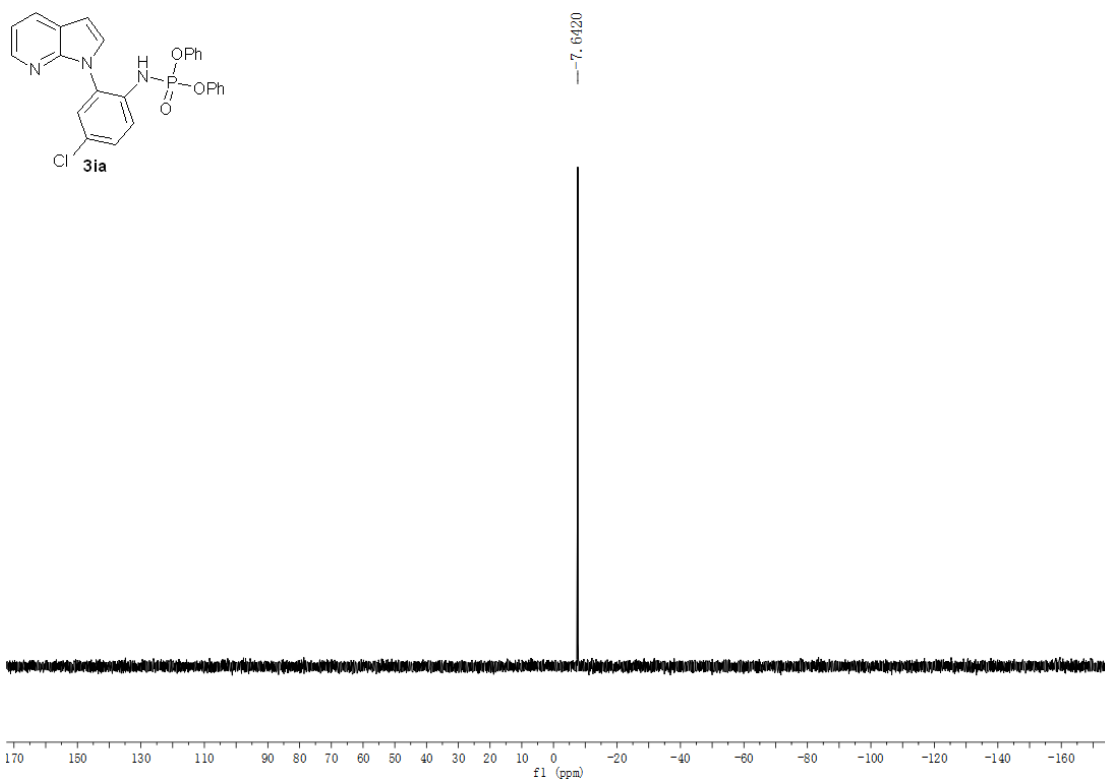

8.2594  
8.2560  
8.2475  
8.2440  
7.9945  
7.9908  
7.9749  
7.9712  
7.9476  
7.9425  
7.4043  
7.3754  
7.3429  
7.3166  
7.2972  
7.2791  
7.2580  
7.1803  
7.1602  
7.1270  
7.1064  
7.0857  
7.0577  
7.0486  
6.6337  
6.6246

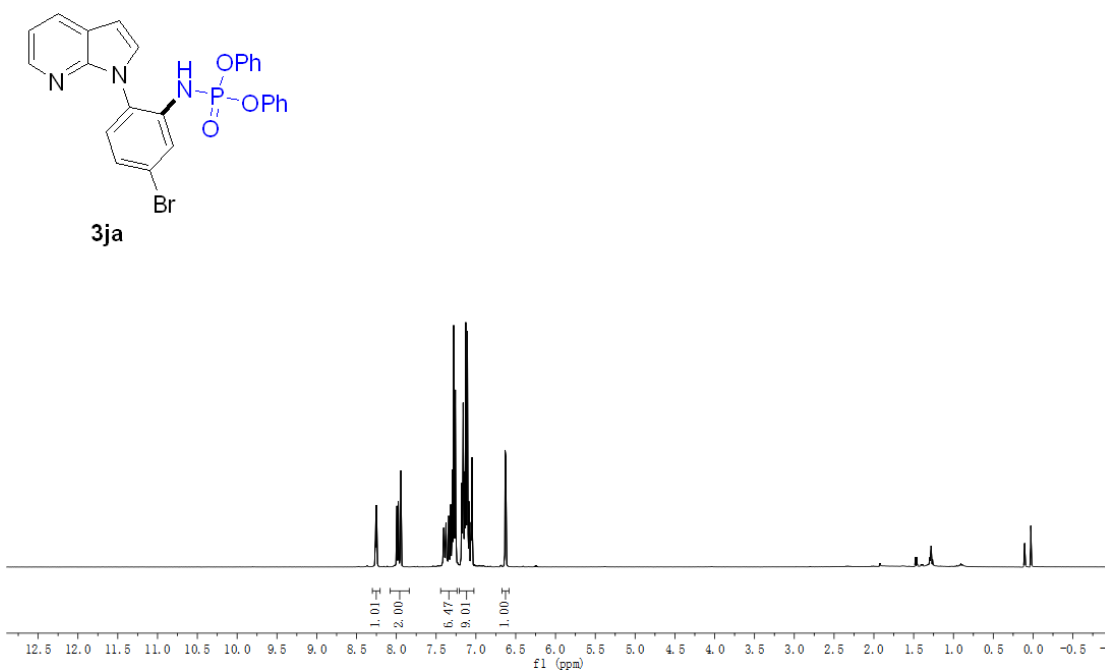

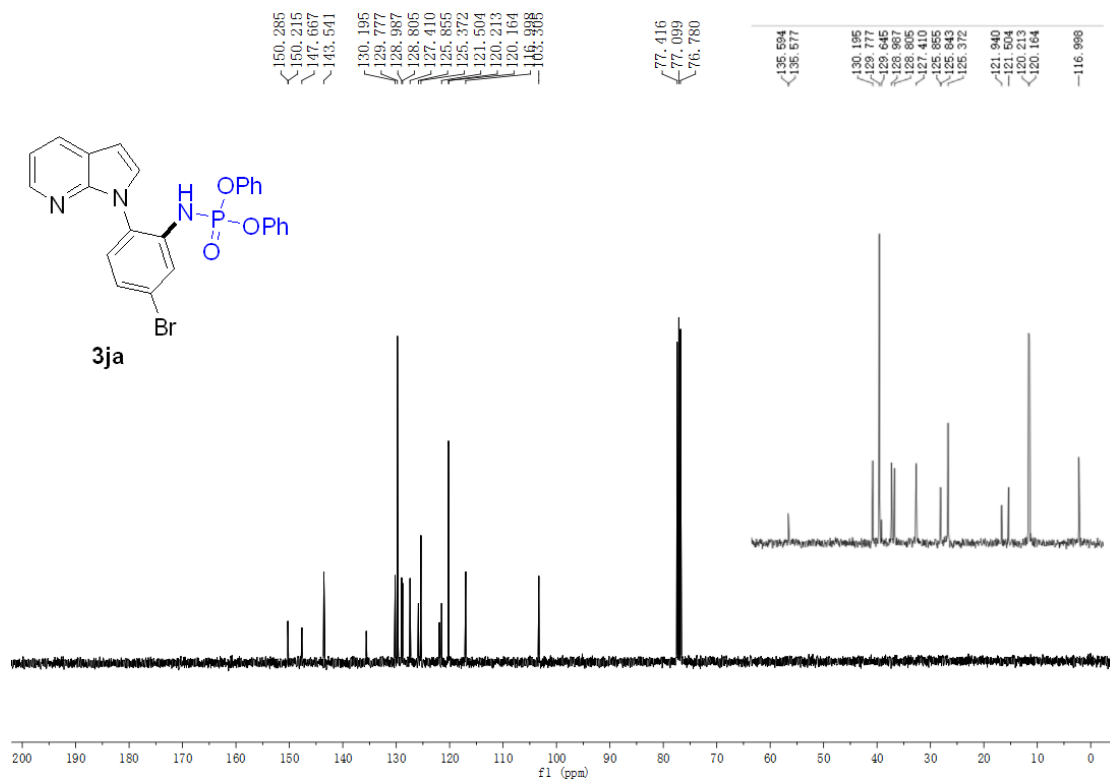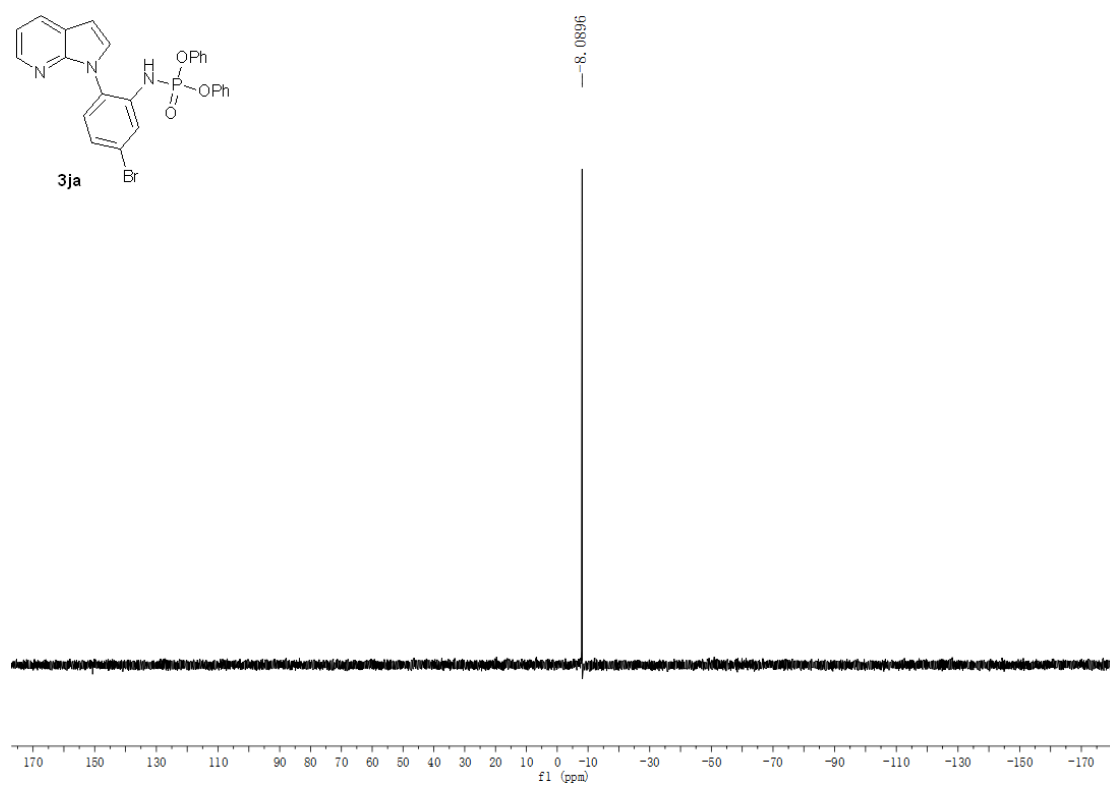

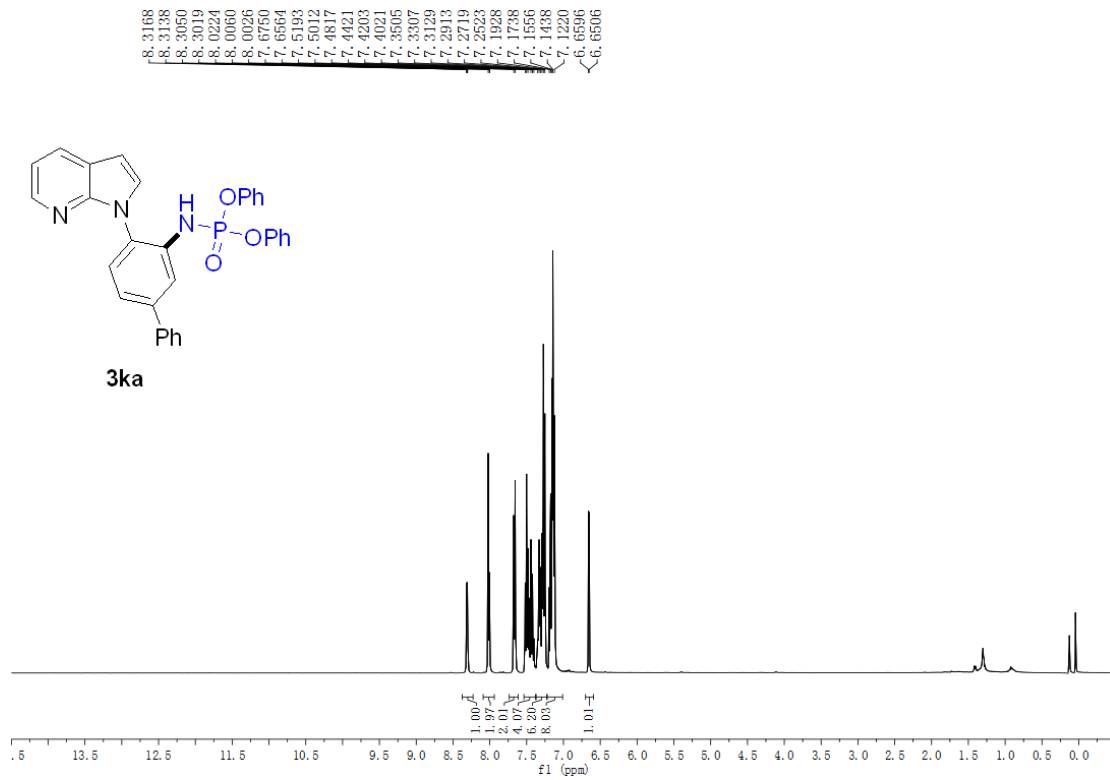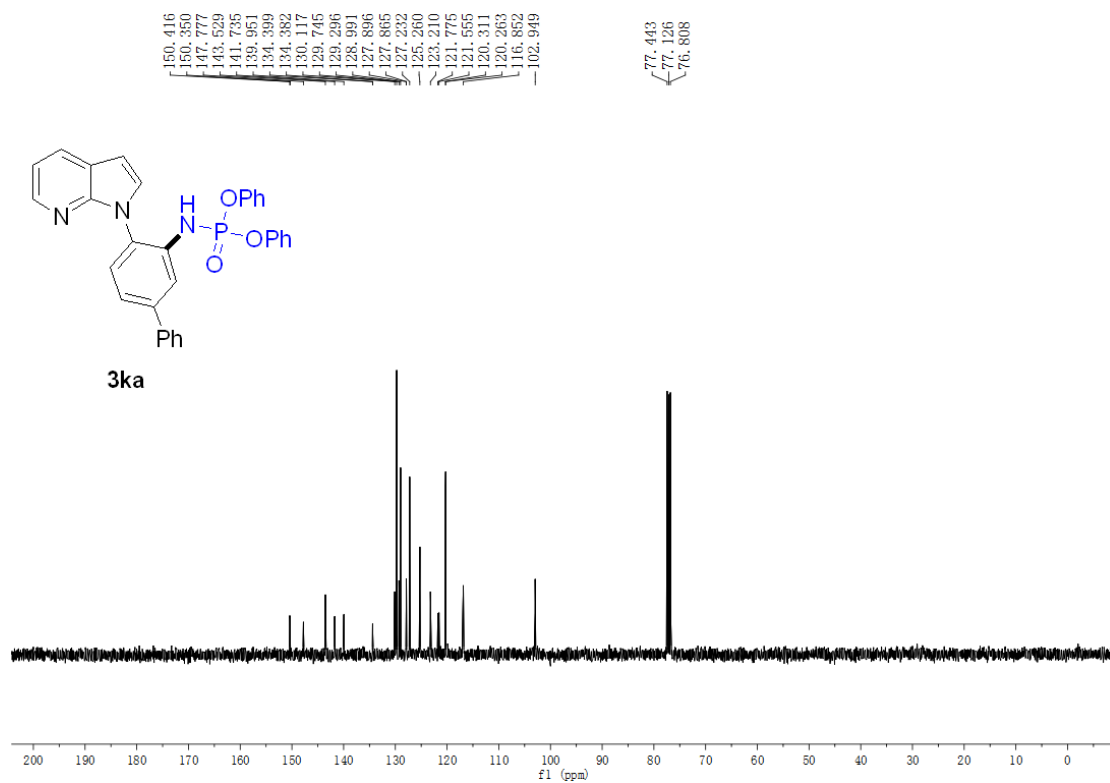

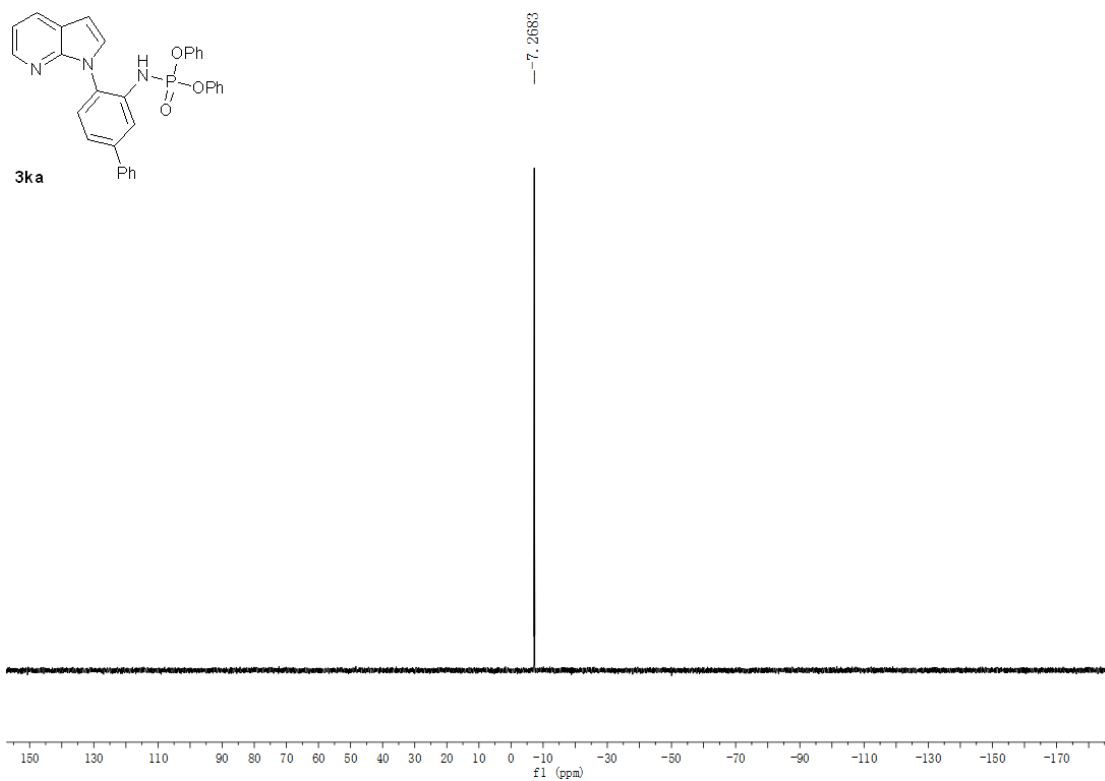

8.2948  
8.2920  
8.2829  
8.2801  
8.0549  
8.0342  
8.0312  
8.0146  
8.0116  
7.9271  
7.9387  
7.8867  
7.8662  
7.8681  
7.8475  
7.8884  
7.8804  
7.8691  
7.8494  
7.8134  
7.8014  
7.1939  
7.1814  
7.1753  
7.1568  
7.1383  
7.1289  
7.1195  
7.1104  
7.0899  
6.6915  
6.6824

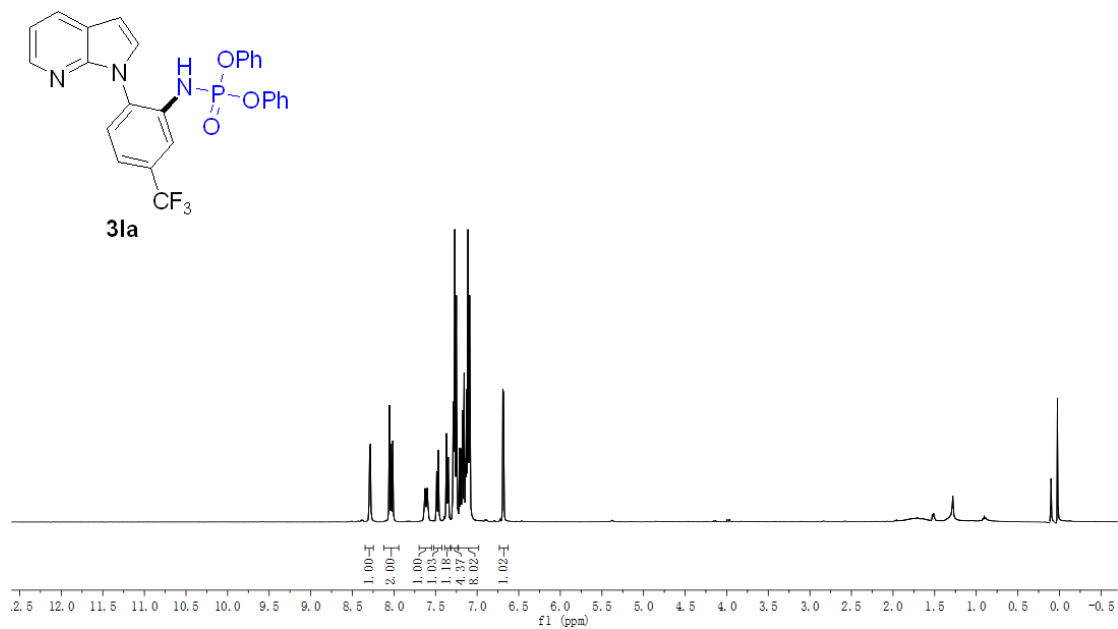

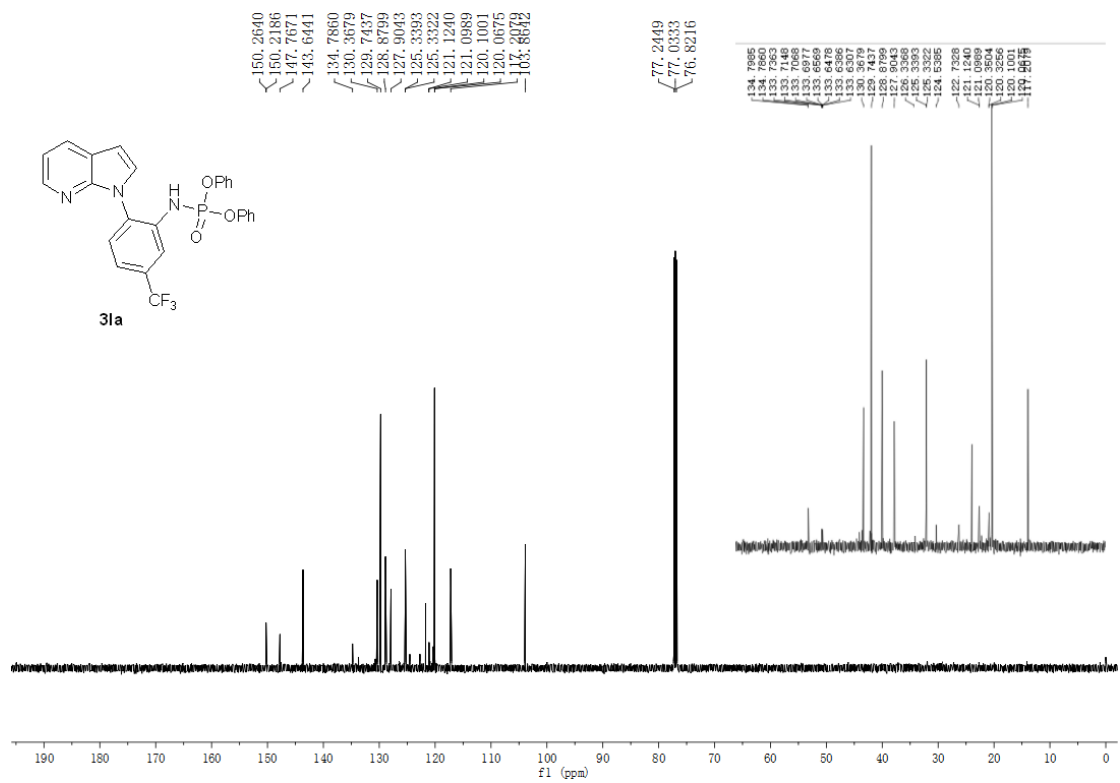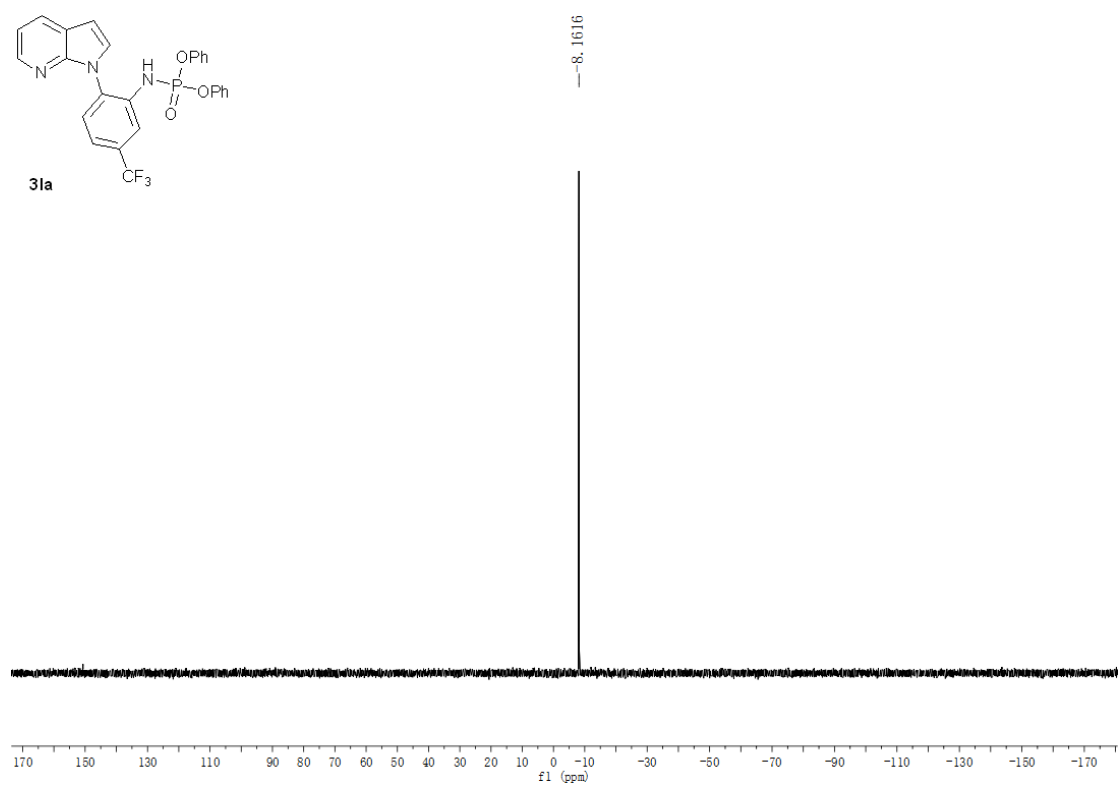

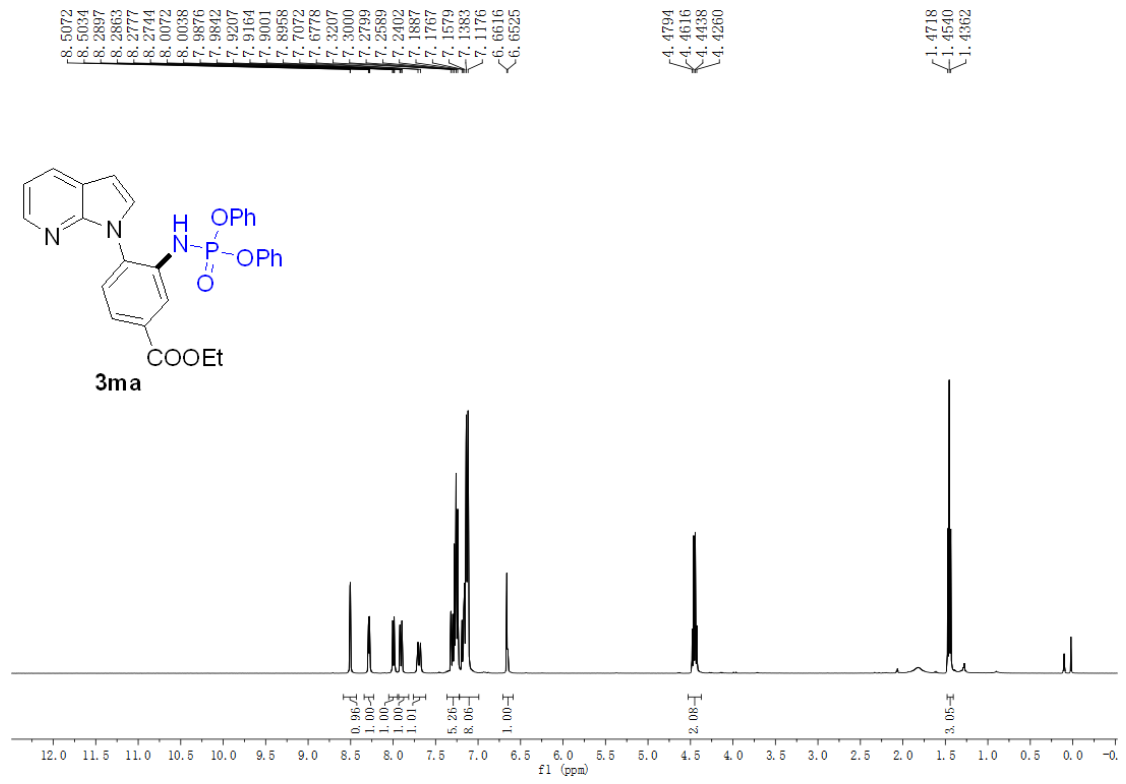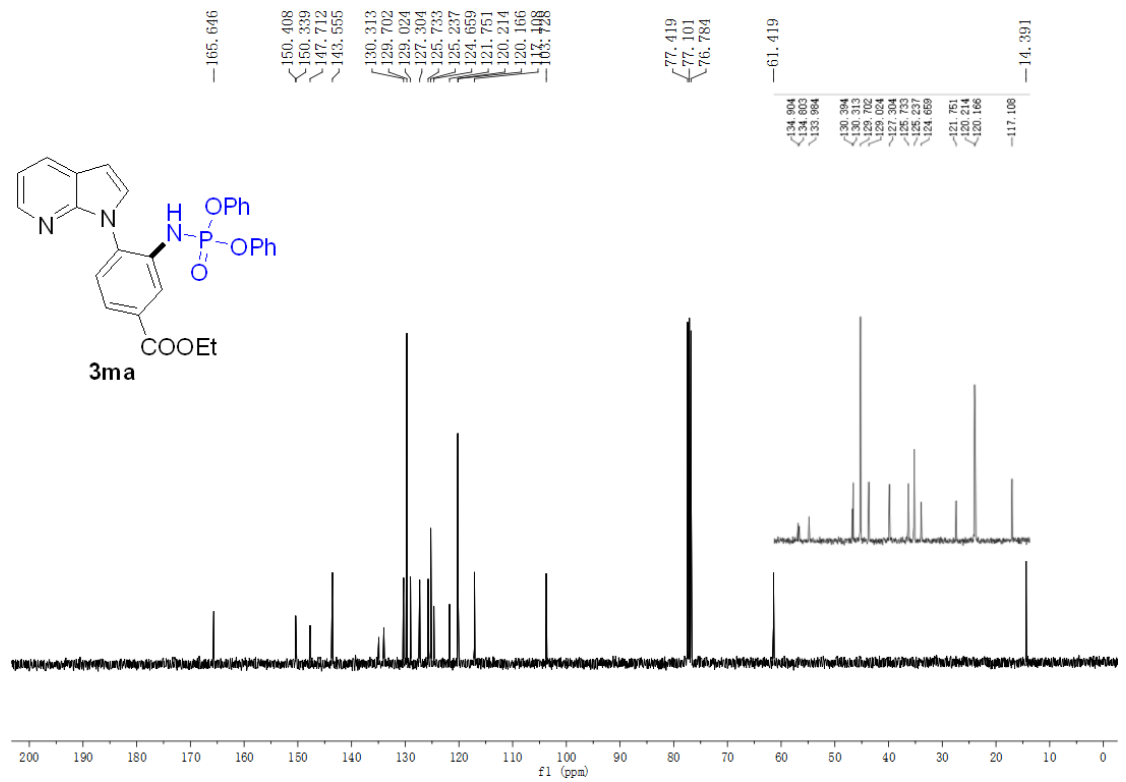

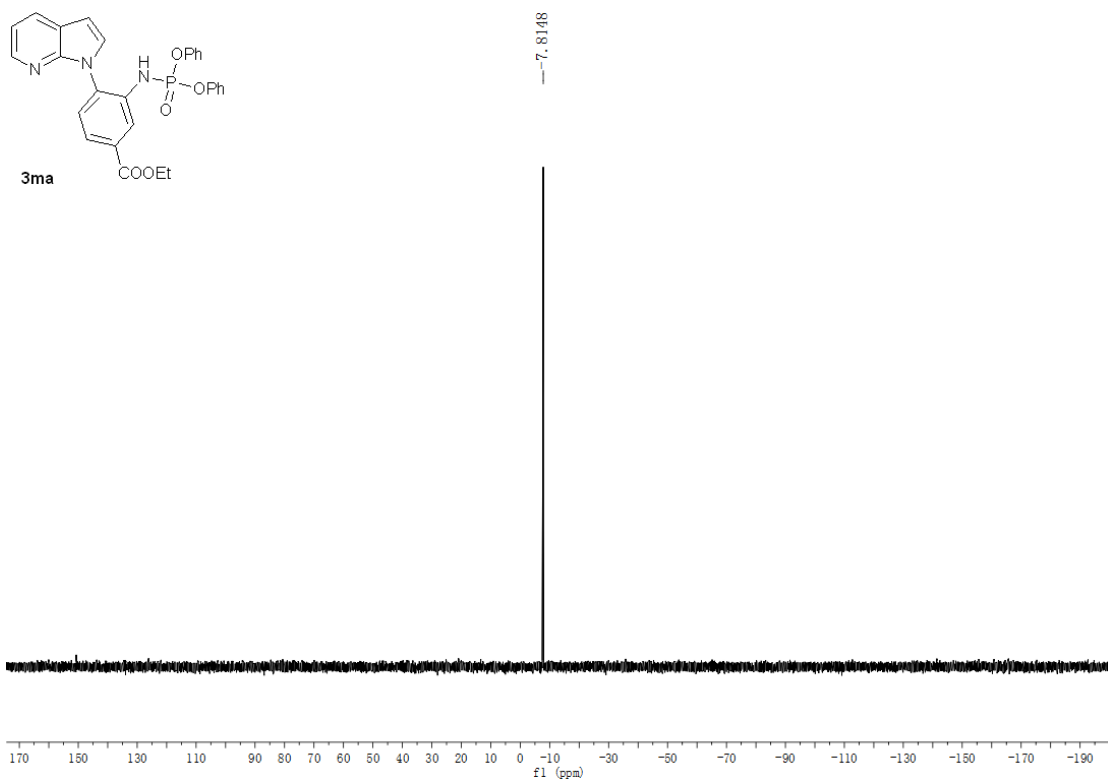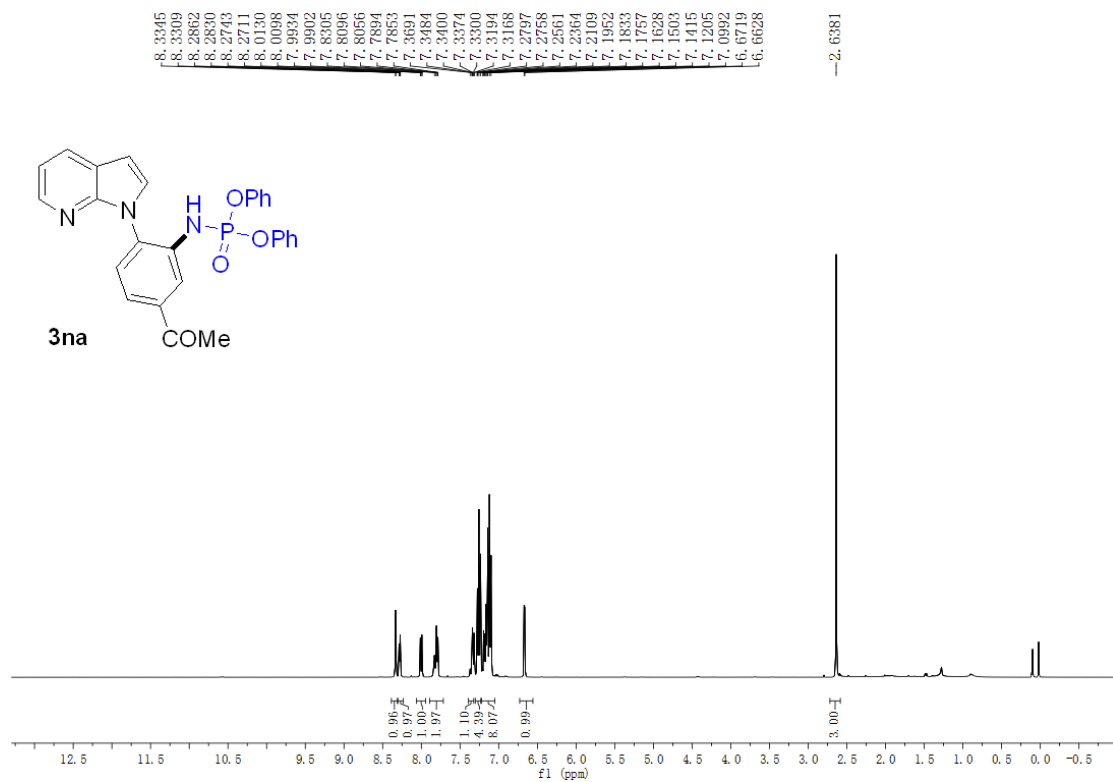

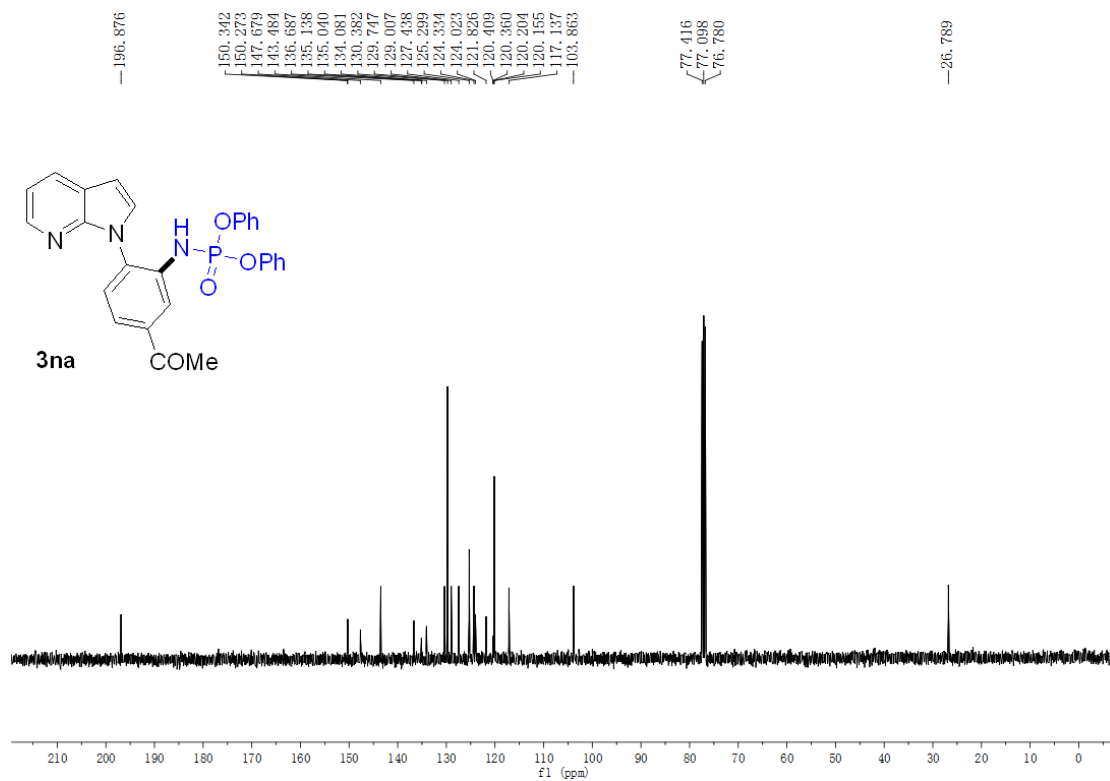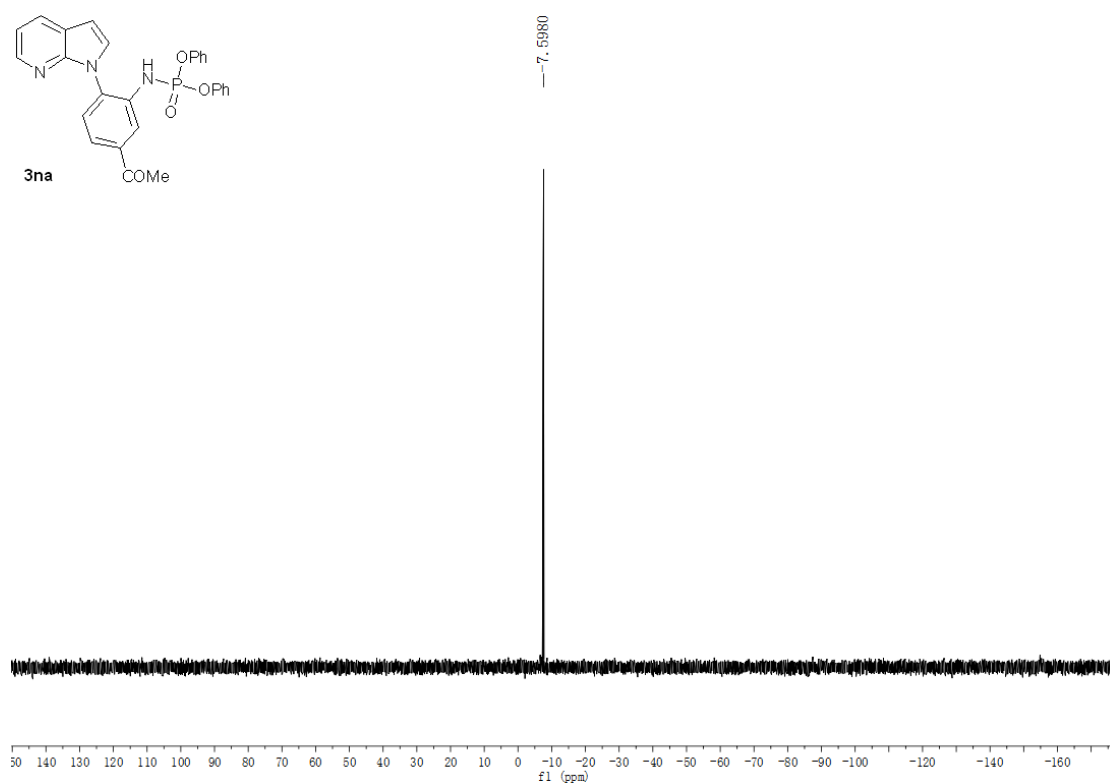



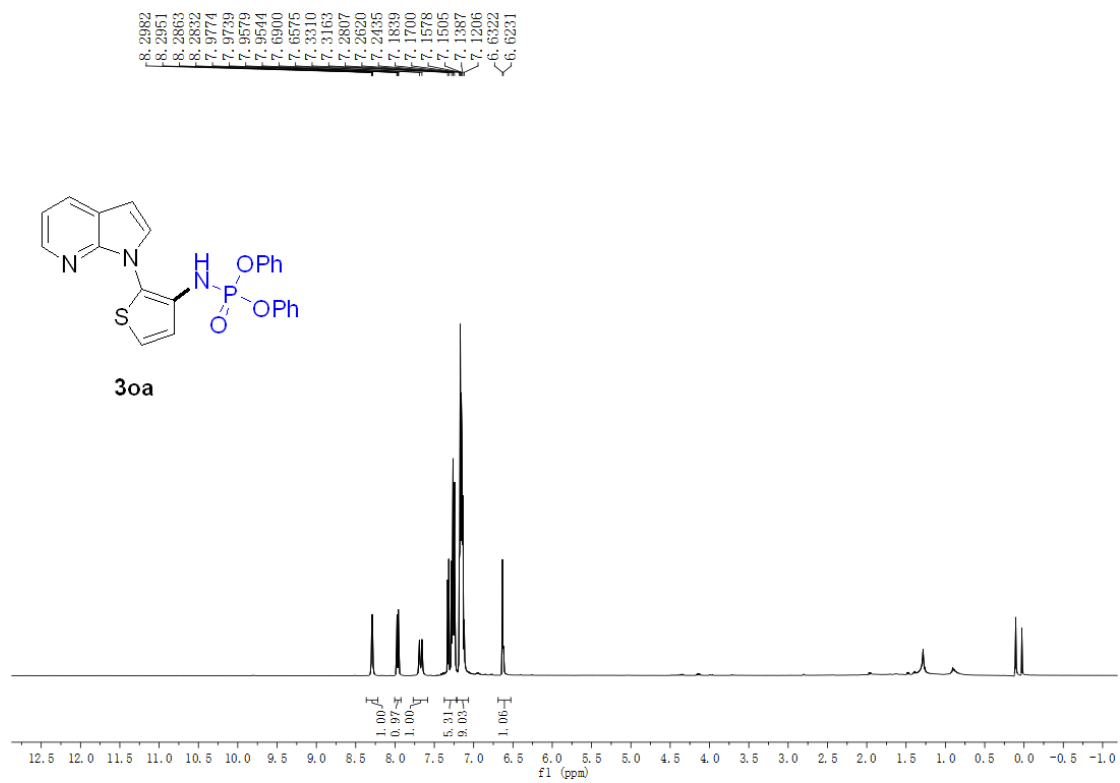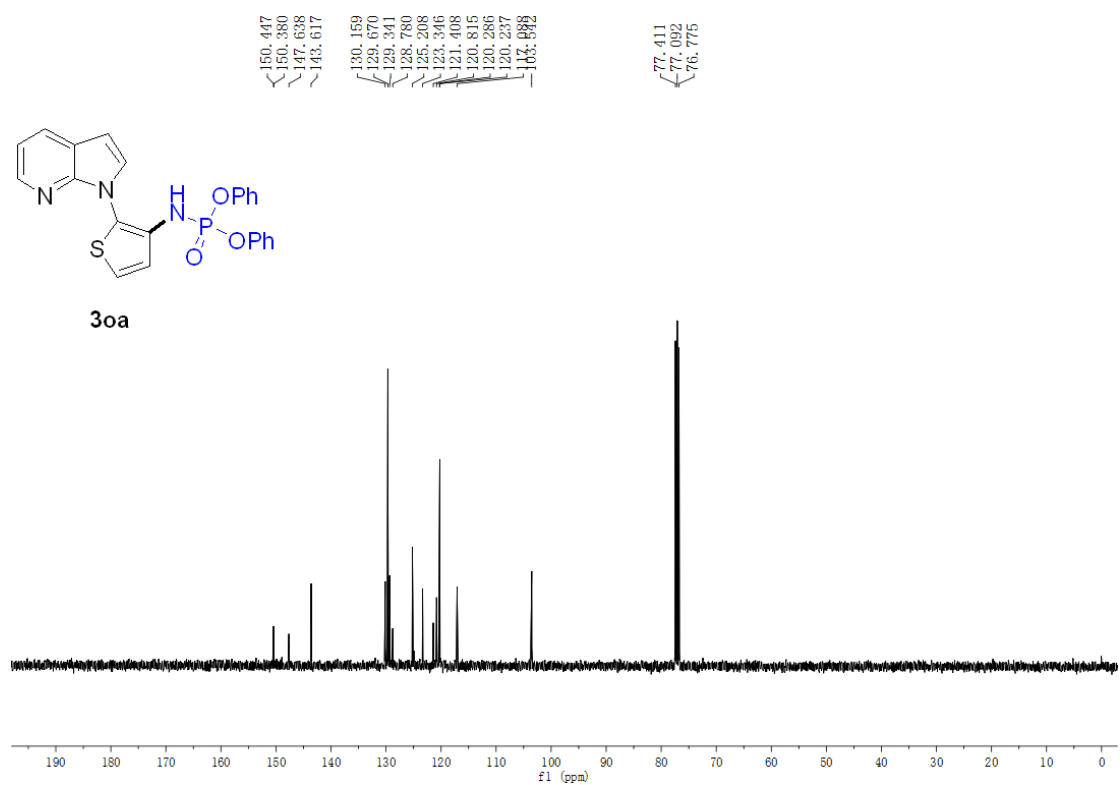

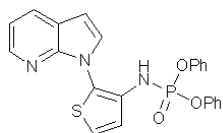

30a

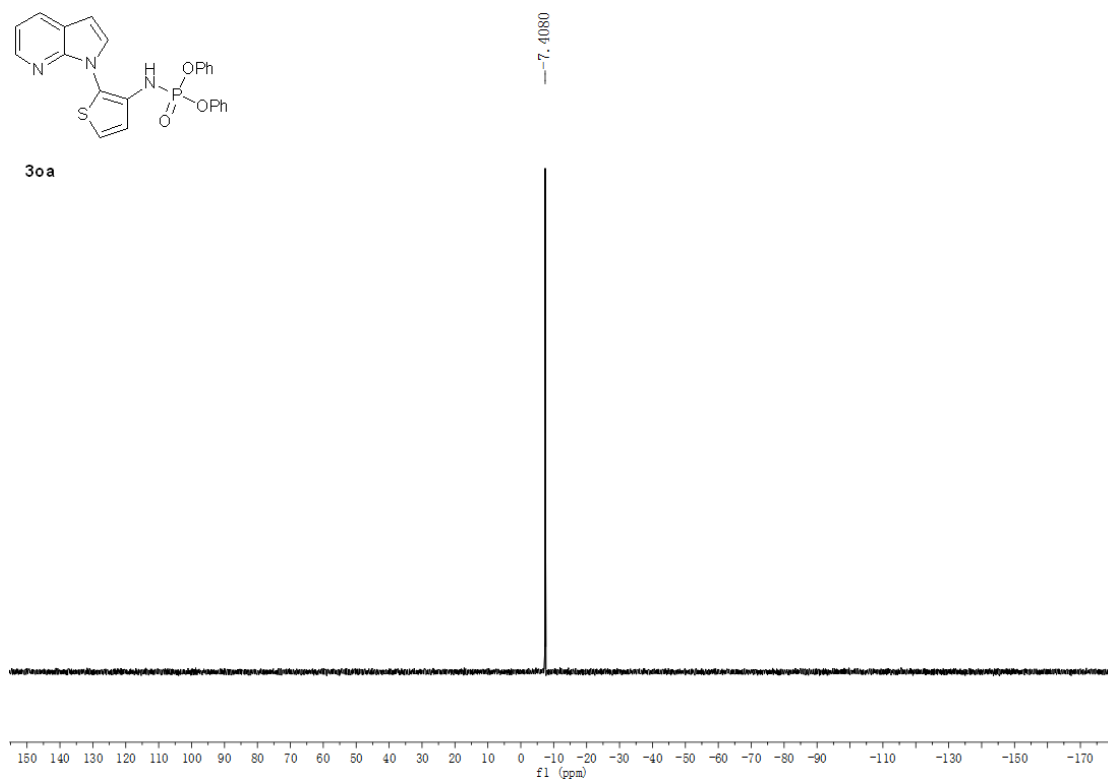

8.3113  
8.3093  
8.3036  
8.0071  
8.0048  
7.9941  
7.9917  
7.6665  
7.6527  
7.4176  
7.4043  
7.3470  
7.3339  
7.3239  
7.3208  
7.3115  
7.2982  
7.2835  
7.2257  
7.2134  
7.1929  
7.1912  
7.1797  
7.1784  
7.1615  
7.1535  
7.1483  
7.1405  
7.0911  
7.0784  
6.8476  
6.8417  
6.6504  
6.4482  
6.2231

-1.8825

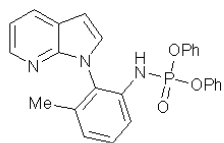

3pa

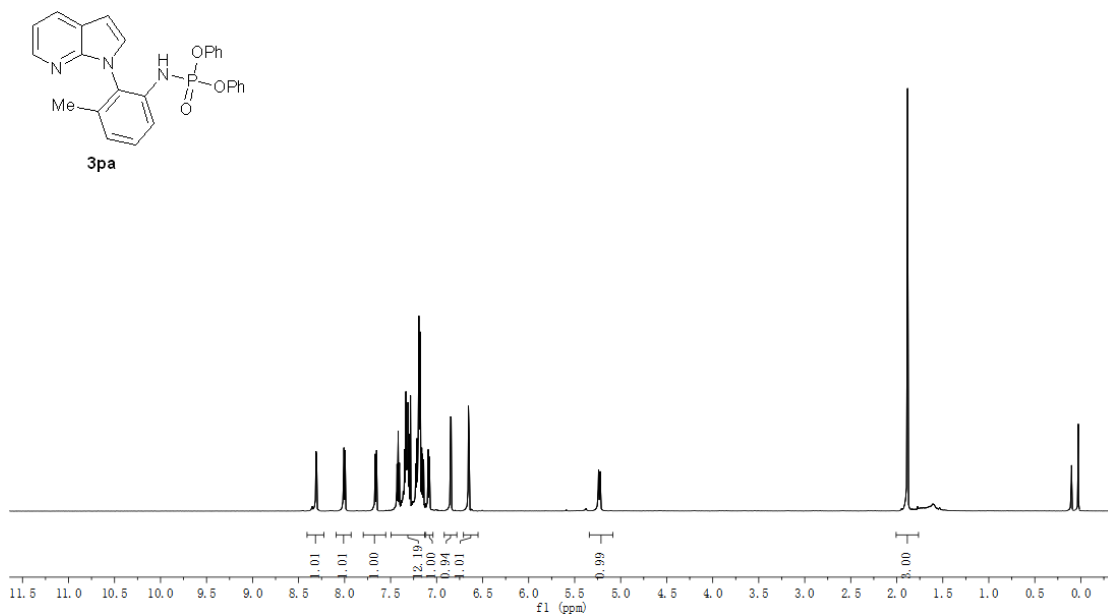

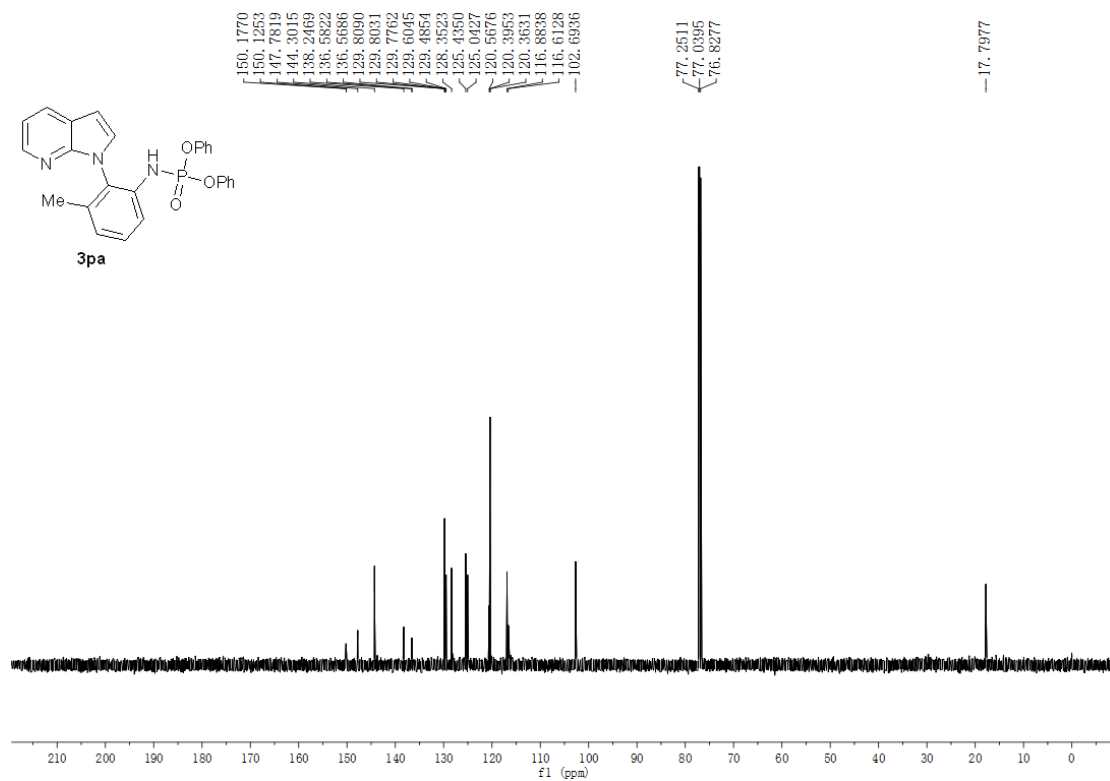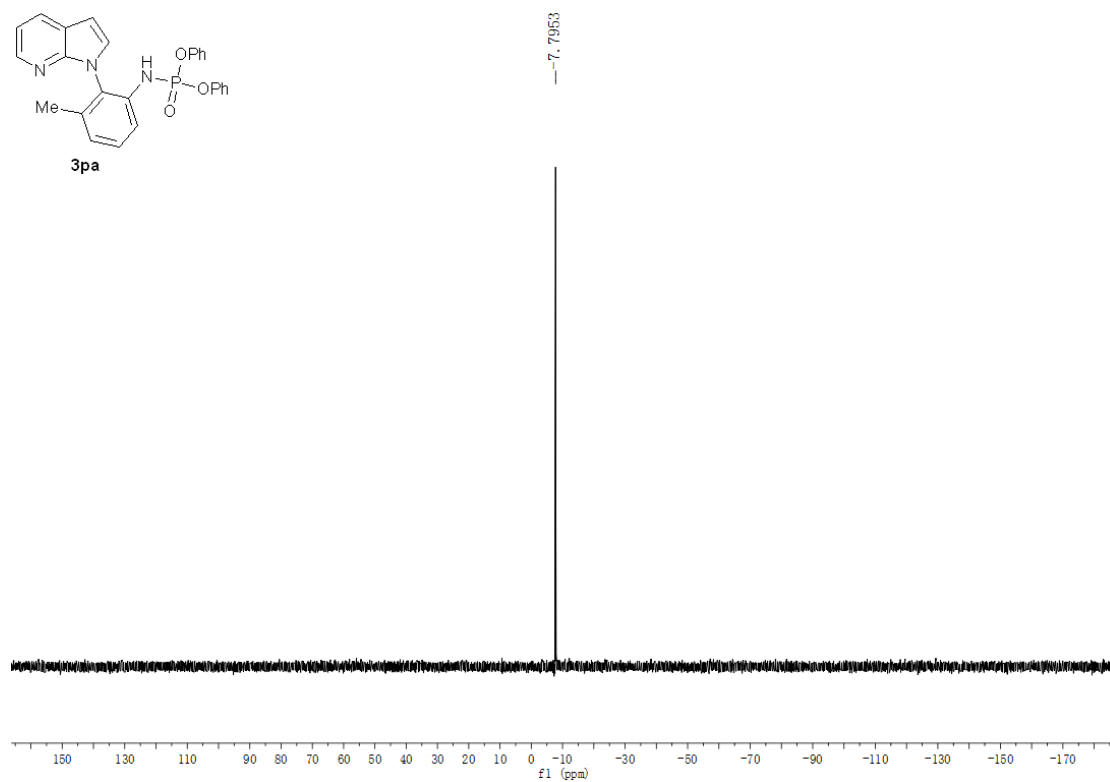

8.3007  
8.2329  
8.0118  
7.9988  
7.7503  
7.7363  
7.4619  
7.4601  
7.4482  
7.4464  
7.4344  
7.4326  
7.3534  
7.3408  
7.3135  
7.2959  
7.2834  
7.2363  
7.2236  
7.1647  
7.1522  
6.9410  
6.9392  
6.9351  
6.6787  
6.6769  
6.6727  
6.6704  
5.6048  
5.5881

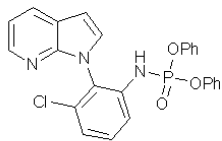

3qa

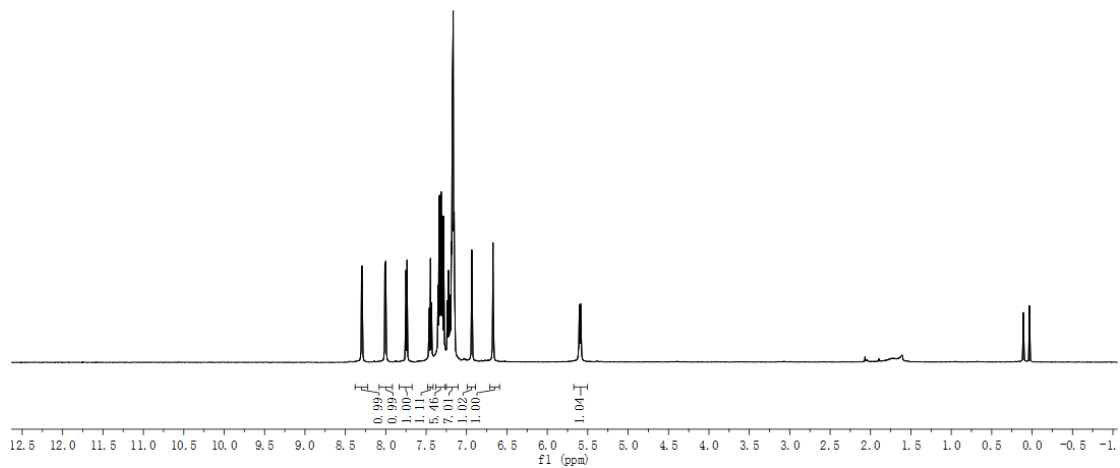

150.1042  
150.0600  
147.8025  
144.2109  
138.3534  
138.3357  
134.3569  
130.2735  
129.8641  
129.6524  
128.7659  
125.5864  
125.5578  
124.4452  
120.7566  
120.2798  
120.2482  
118.0359  
117.2334  
102.9920  
77.2663  
77.0547  
76.8429

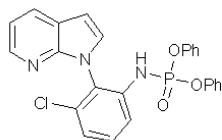

3qa

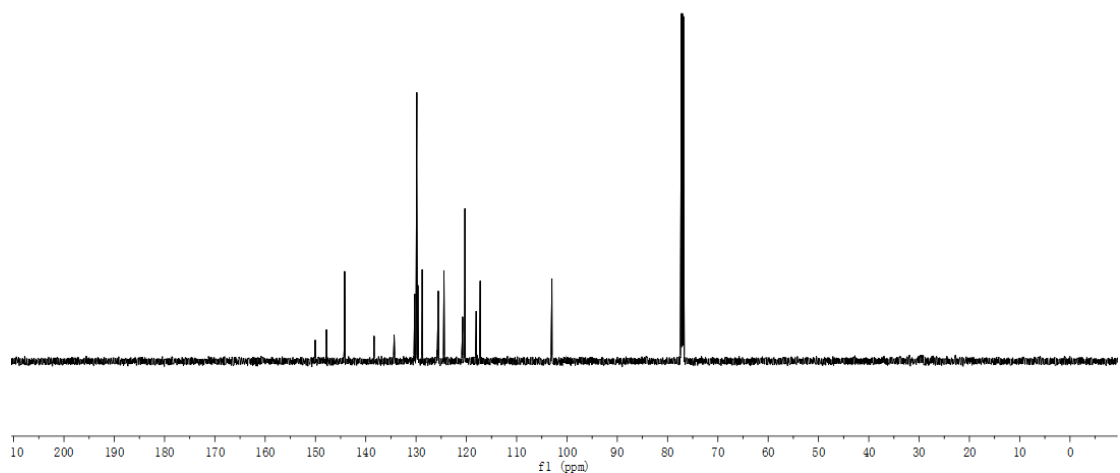

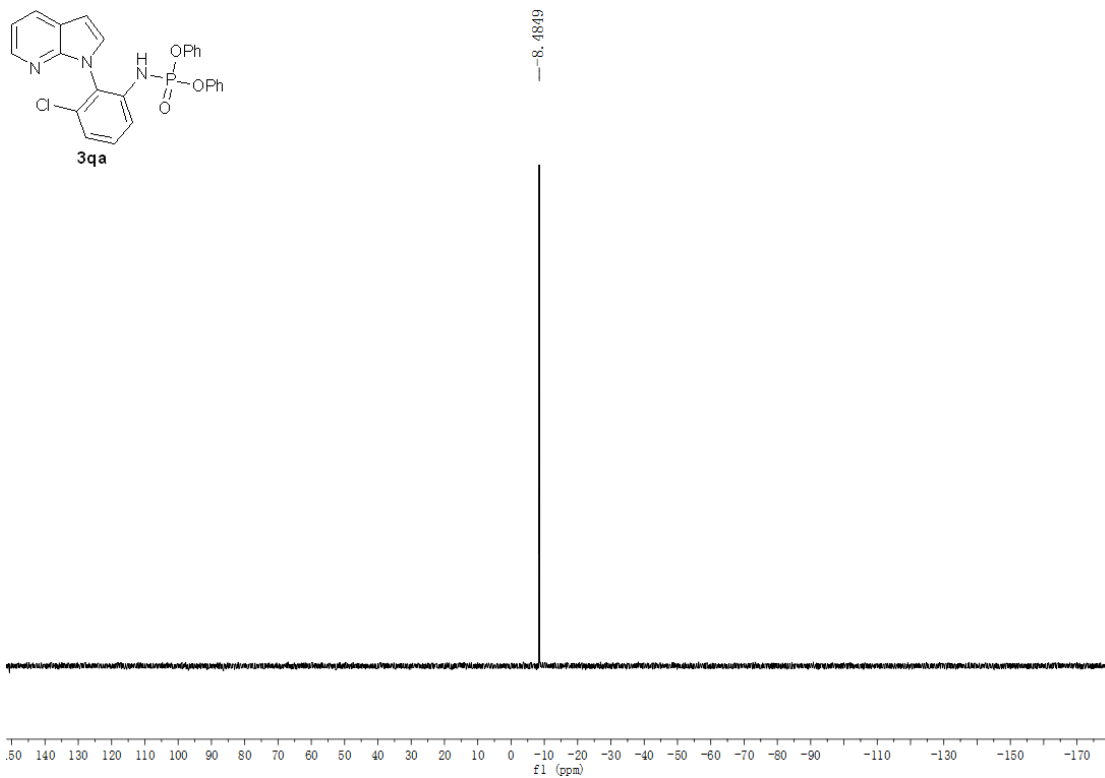

8.2972  
8.2948  
8.2892  
8.2869  
8.2771  
8.2748  
8.2692  
8.2669  
8.0181  
8.0156  
8.0050  
8.0026  
7.9838  
7.9814  
7.9708  
7.9684  
7.7542  
7.7450  
7.7302  
7.7301  
7.6662  
7.6174  
7.4089  
7.3889  
7.3649  
7.2839  
7.2564  
7.2434  
7.2301  
7.1372  
7.0935  
7.0643  
7.0502  
6.9564  
6.9459  
6.6503  
6.6442  
6.5998  
6.5837

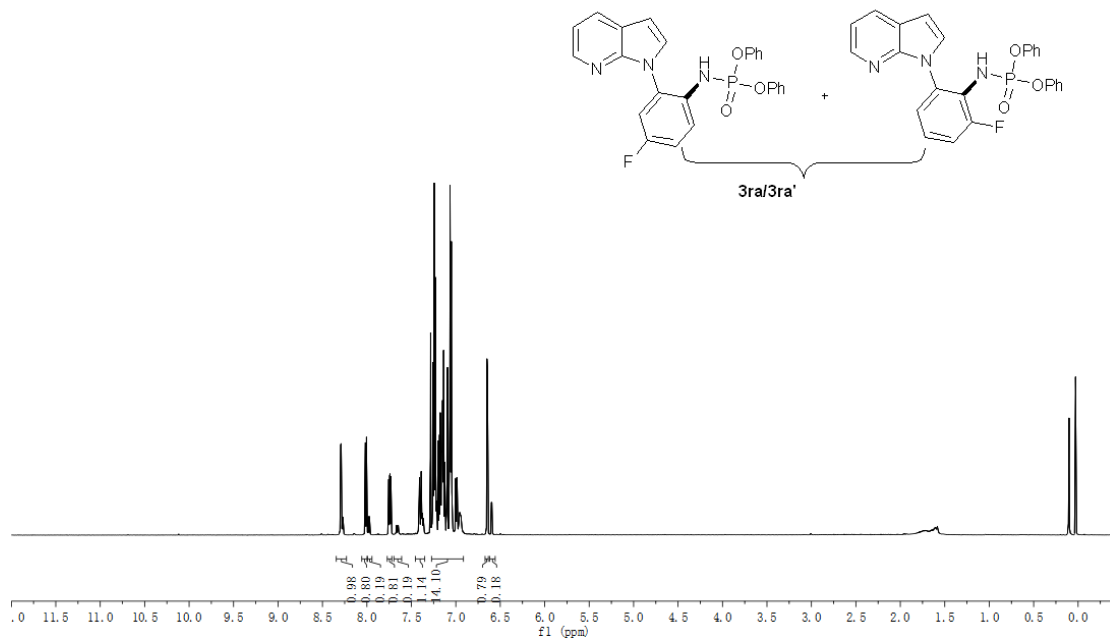



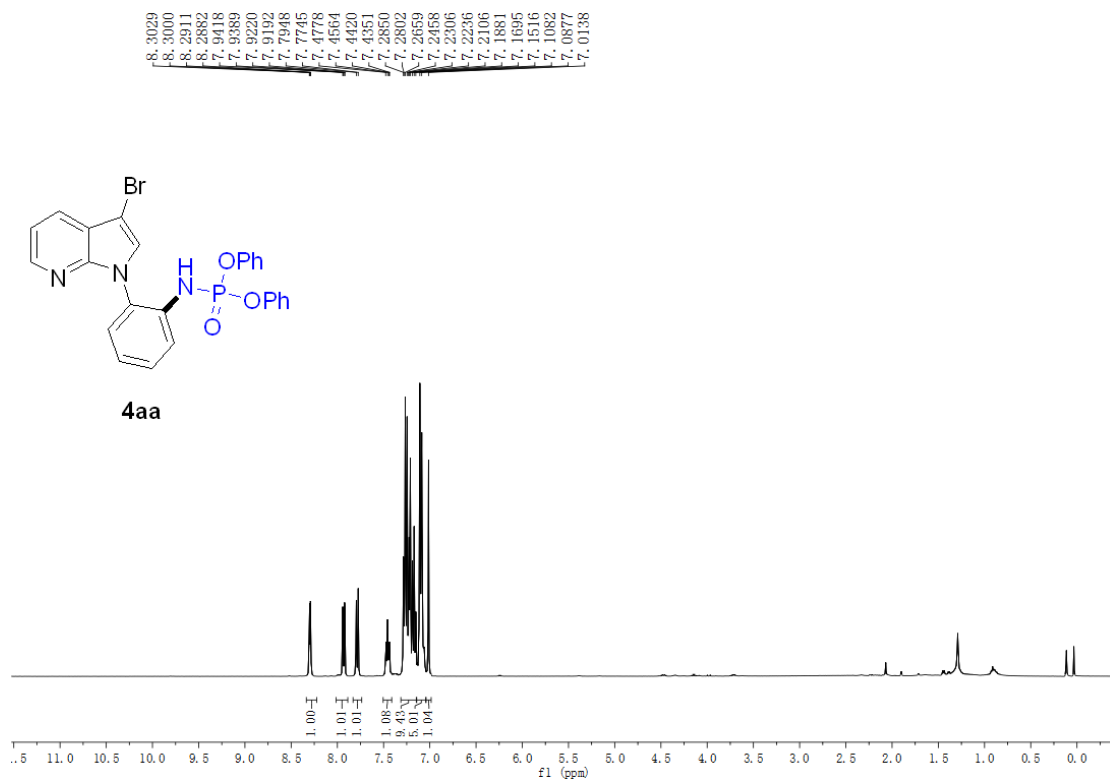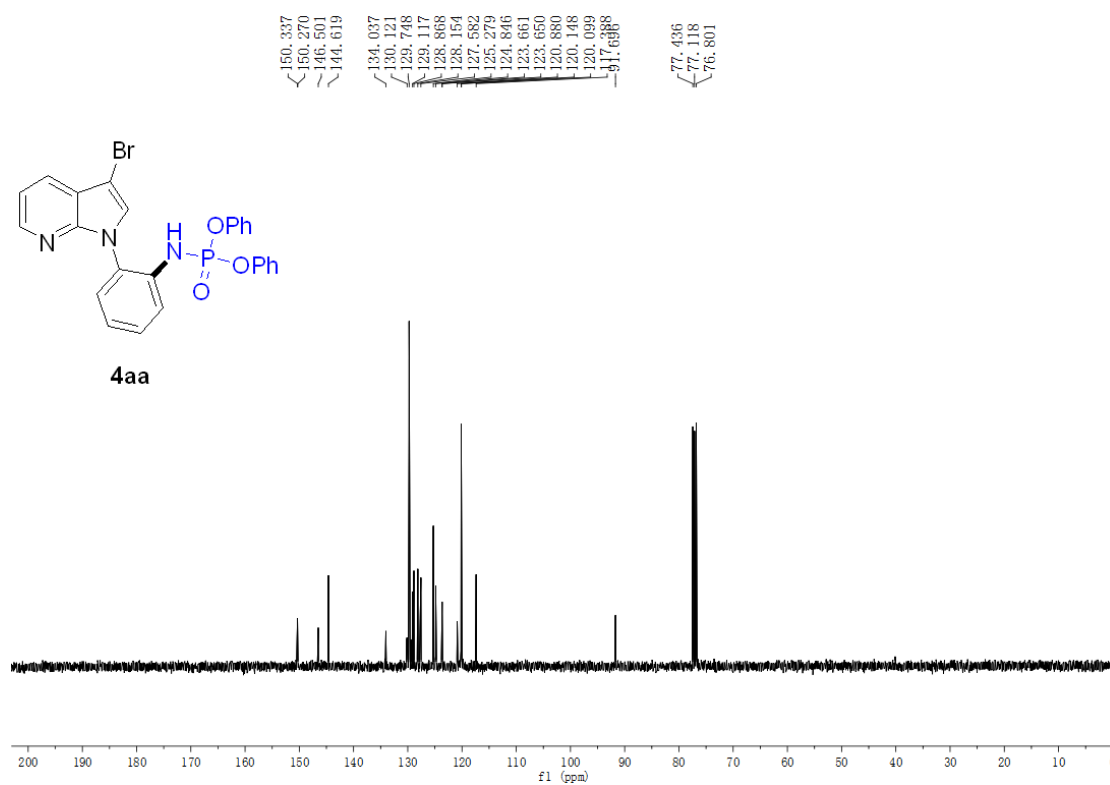

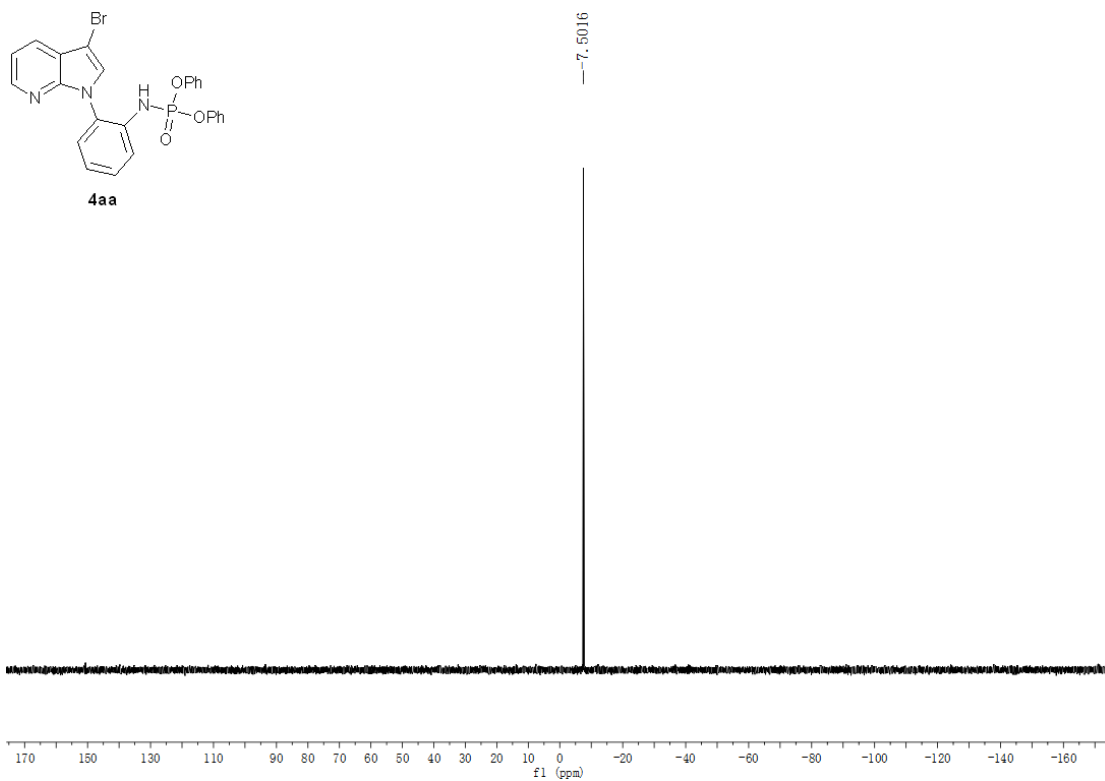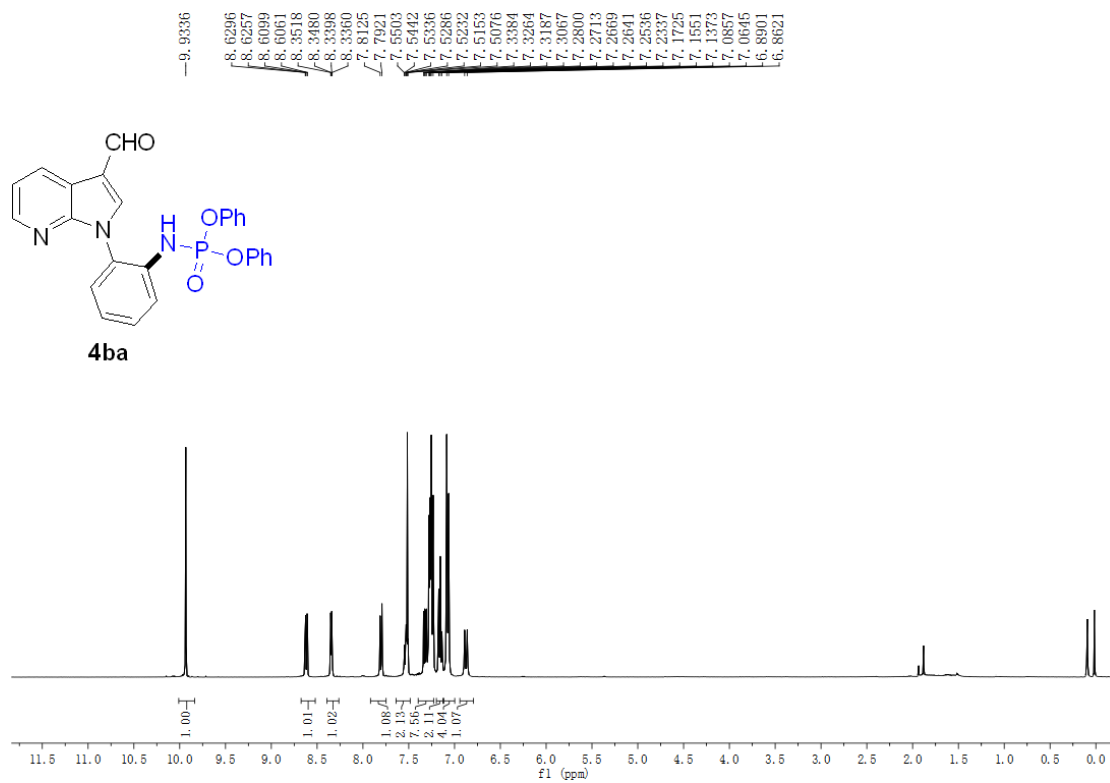



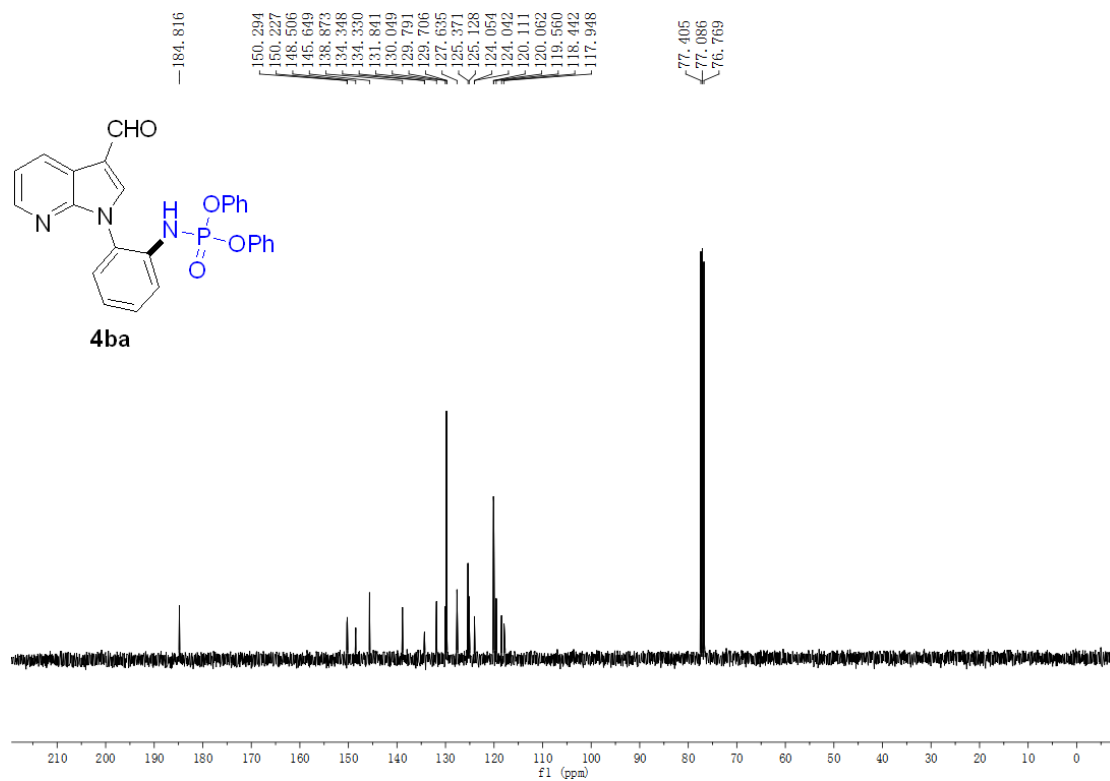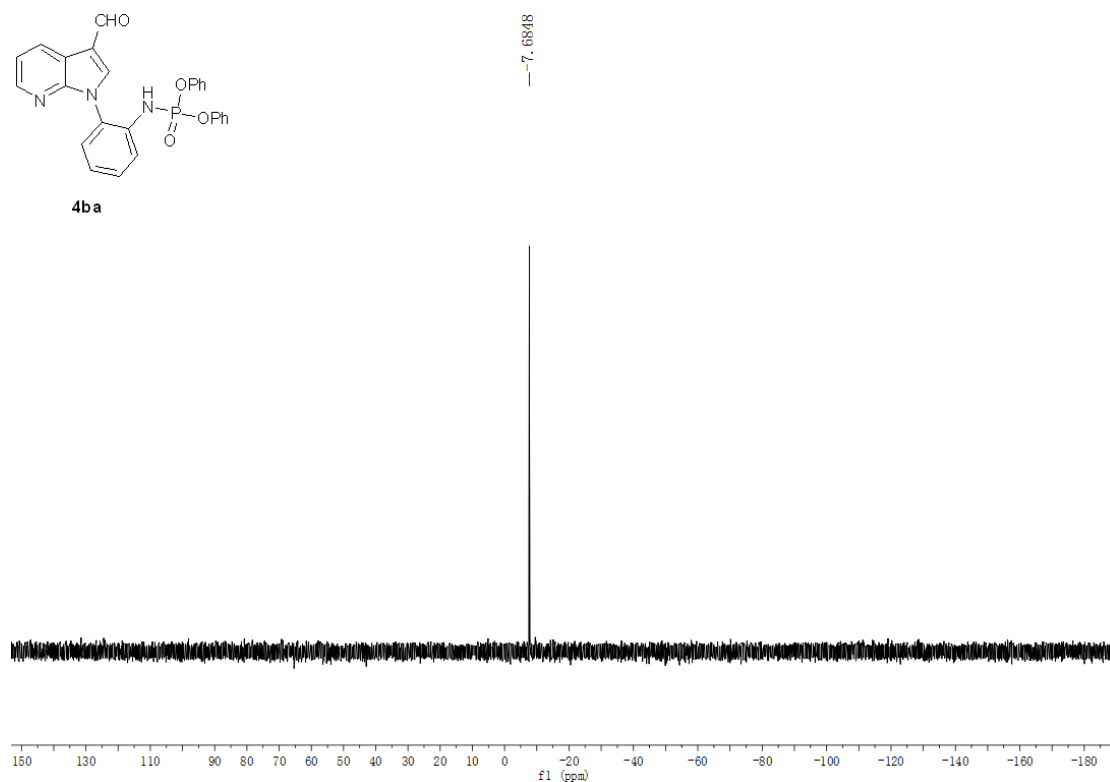

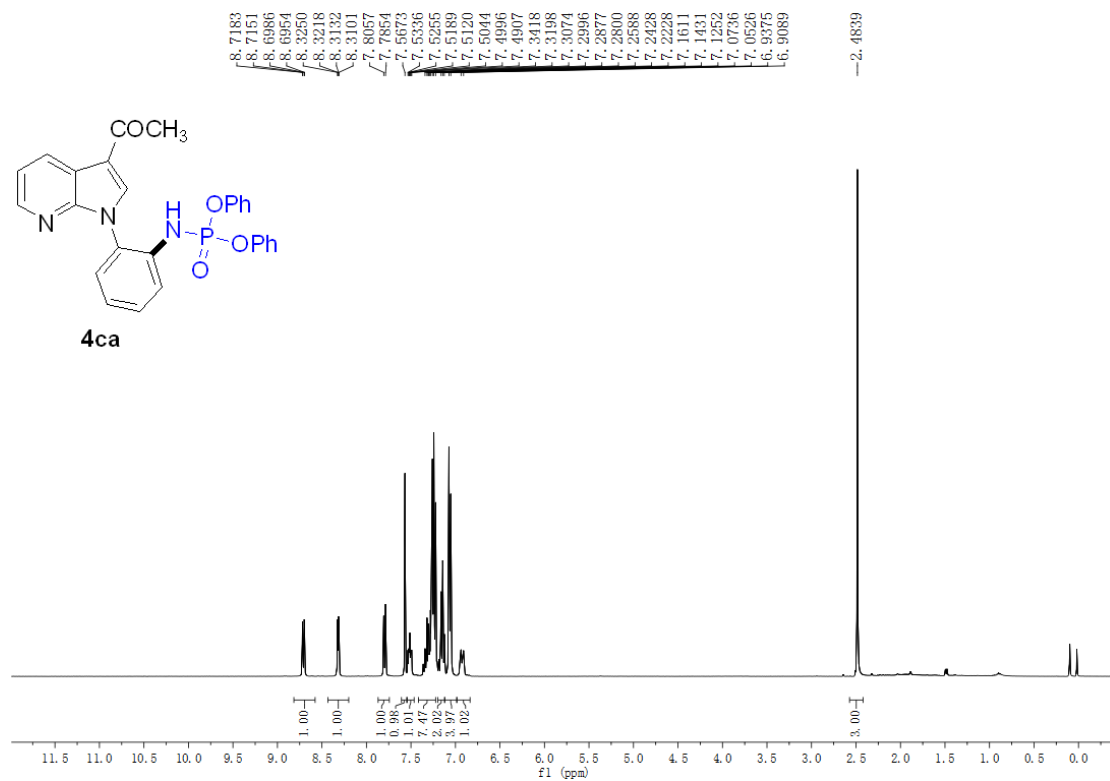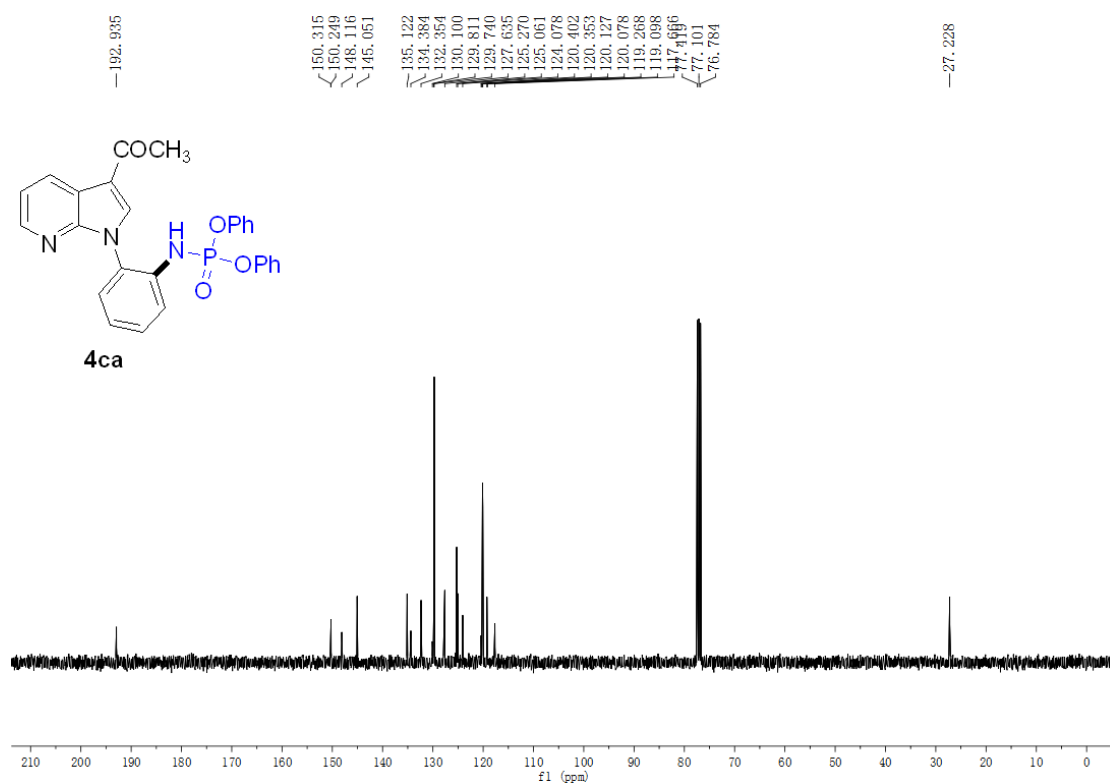

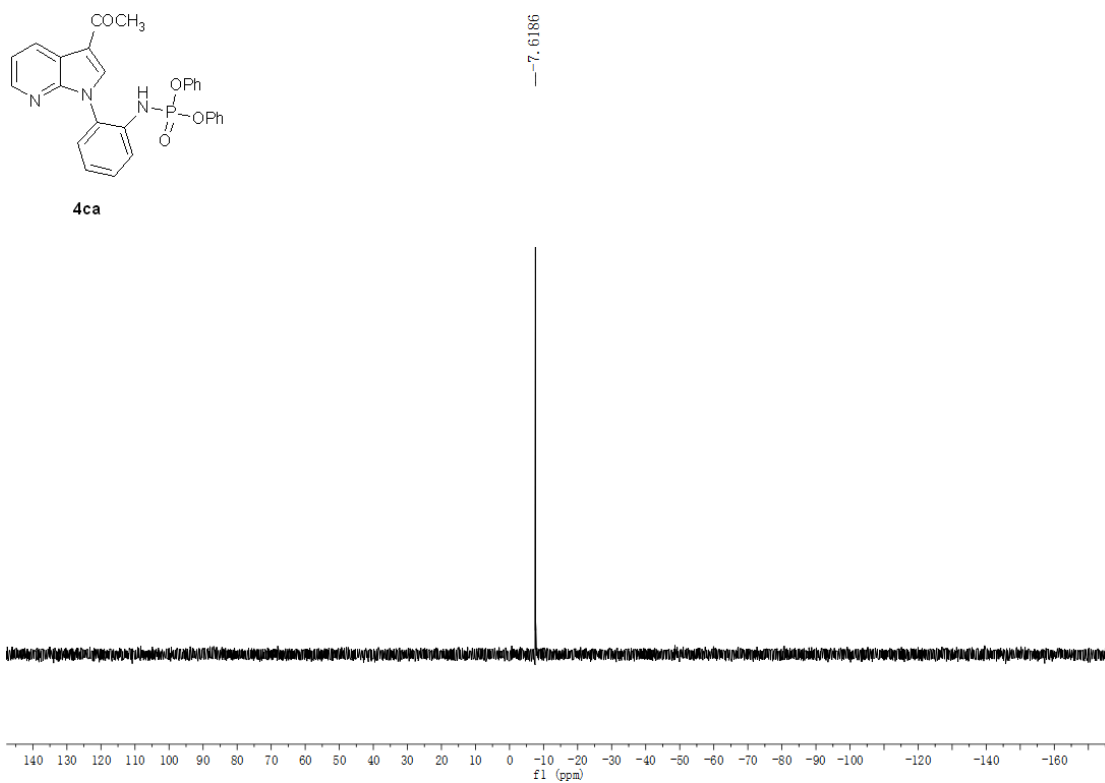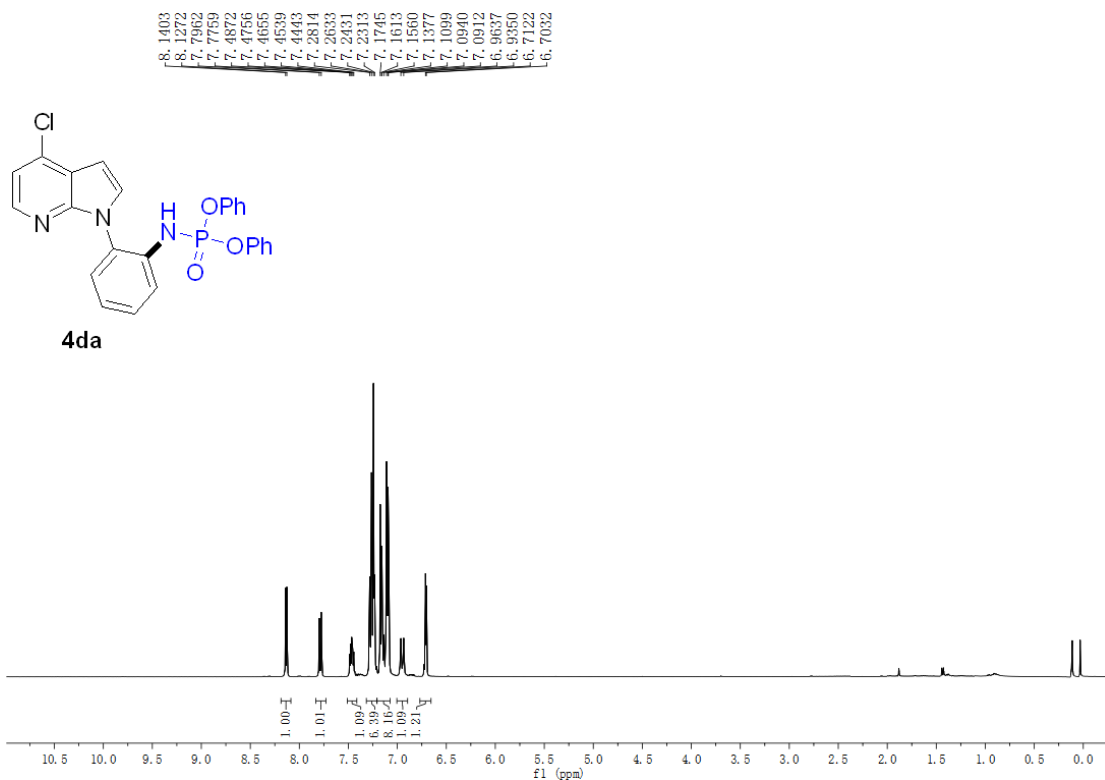

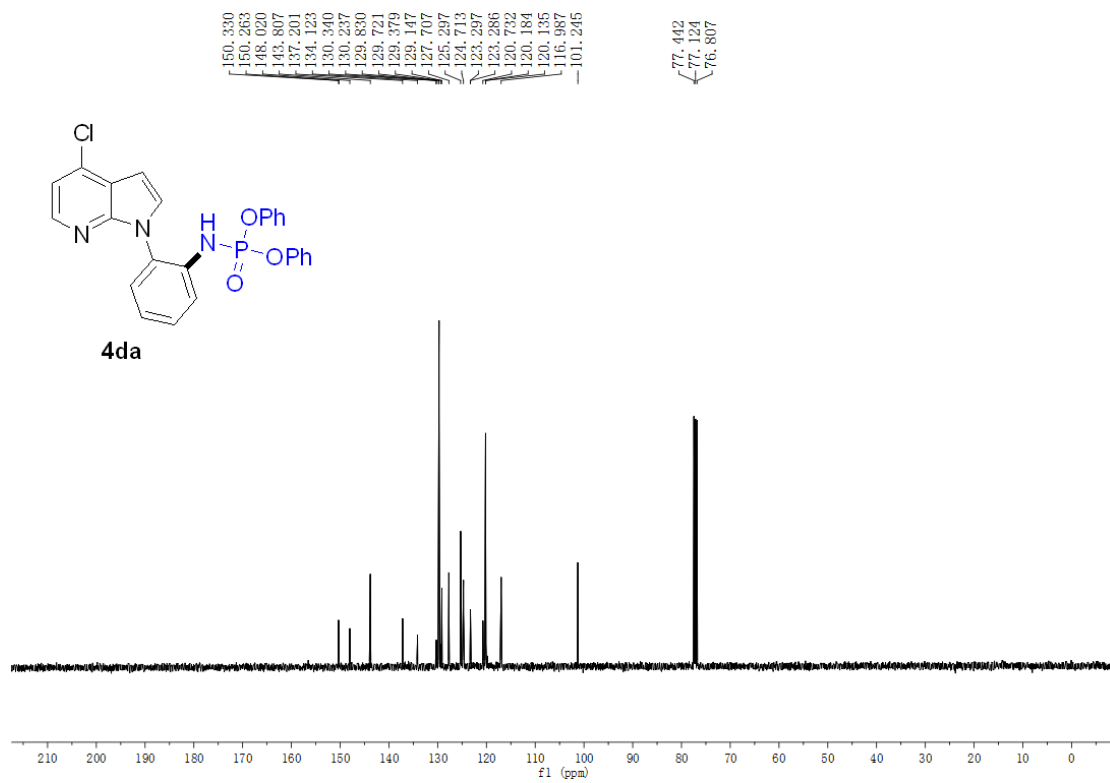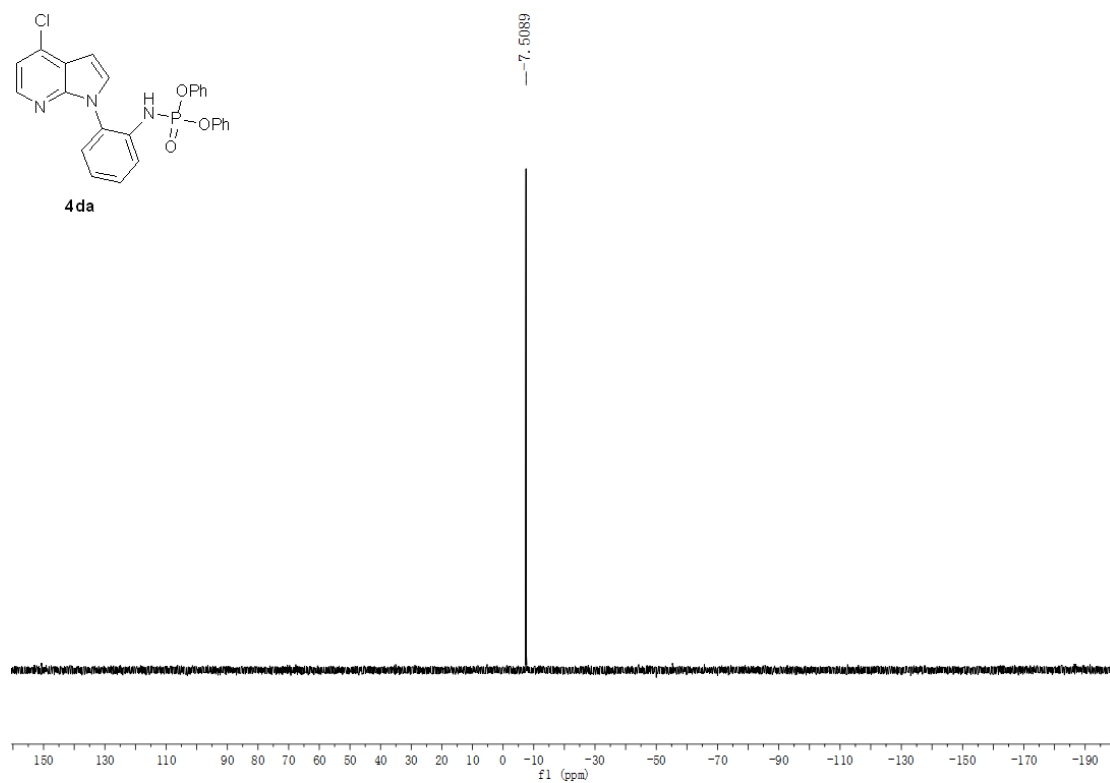

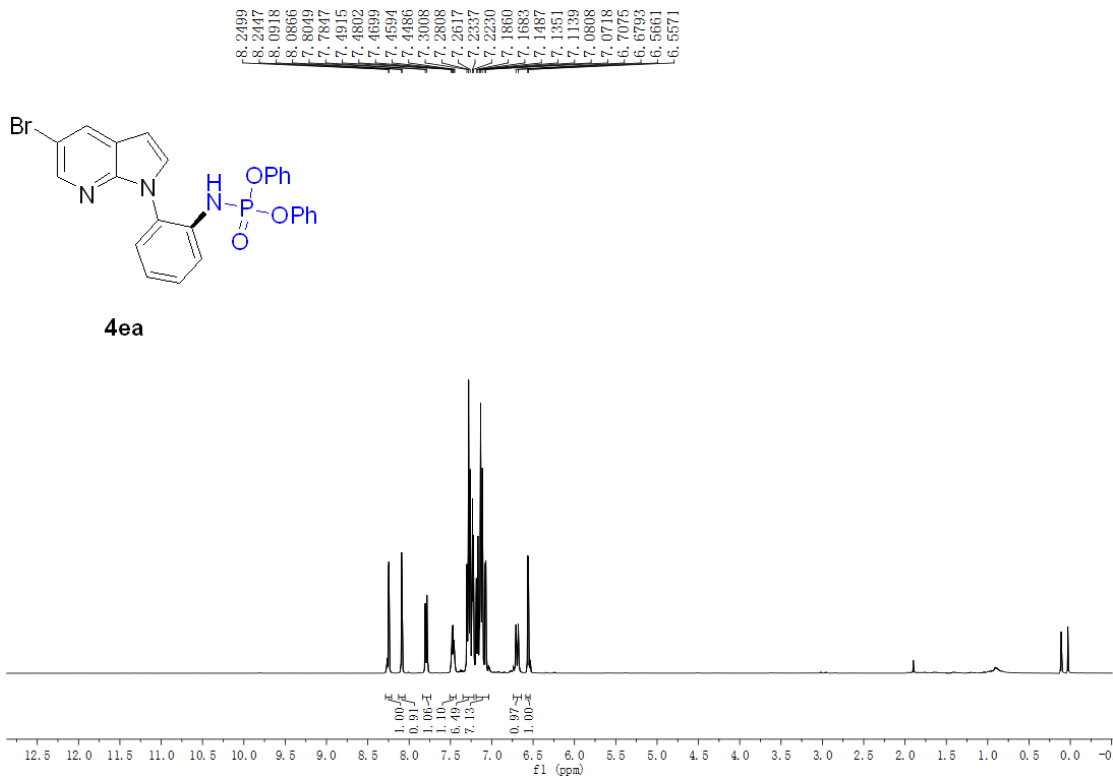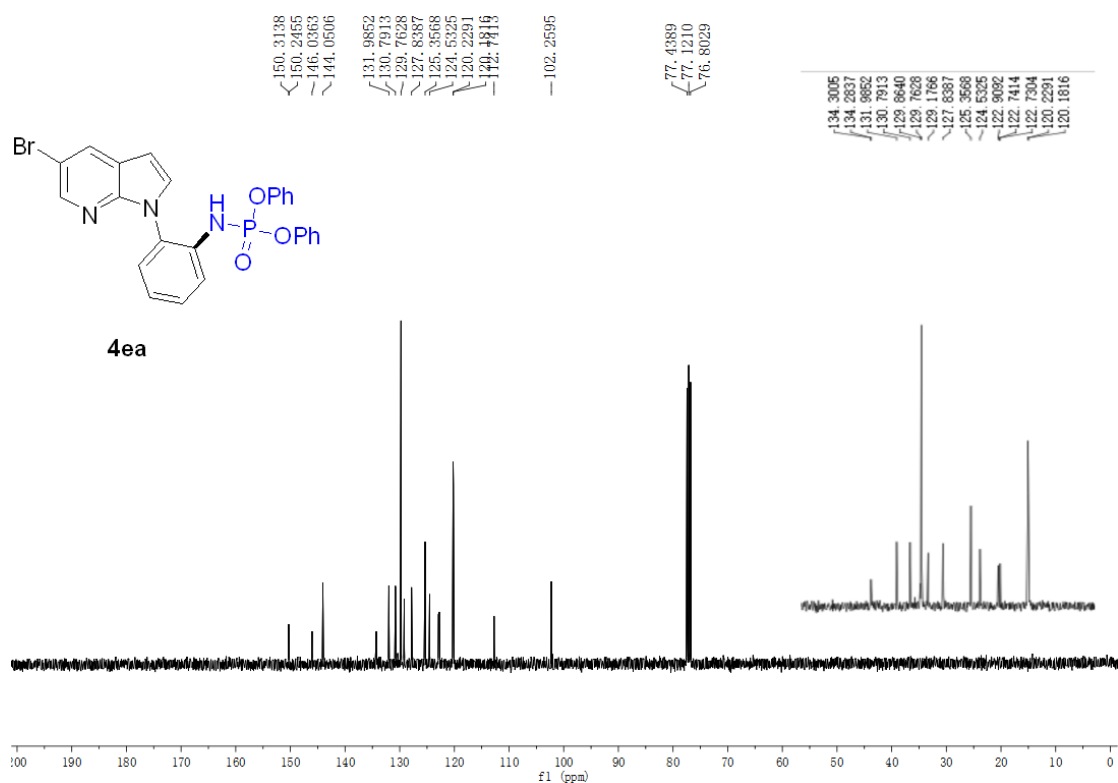

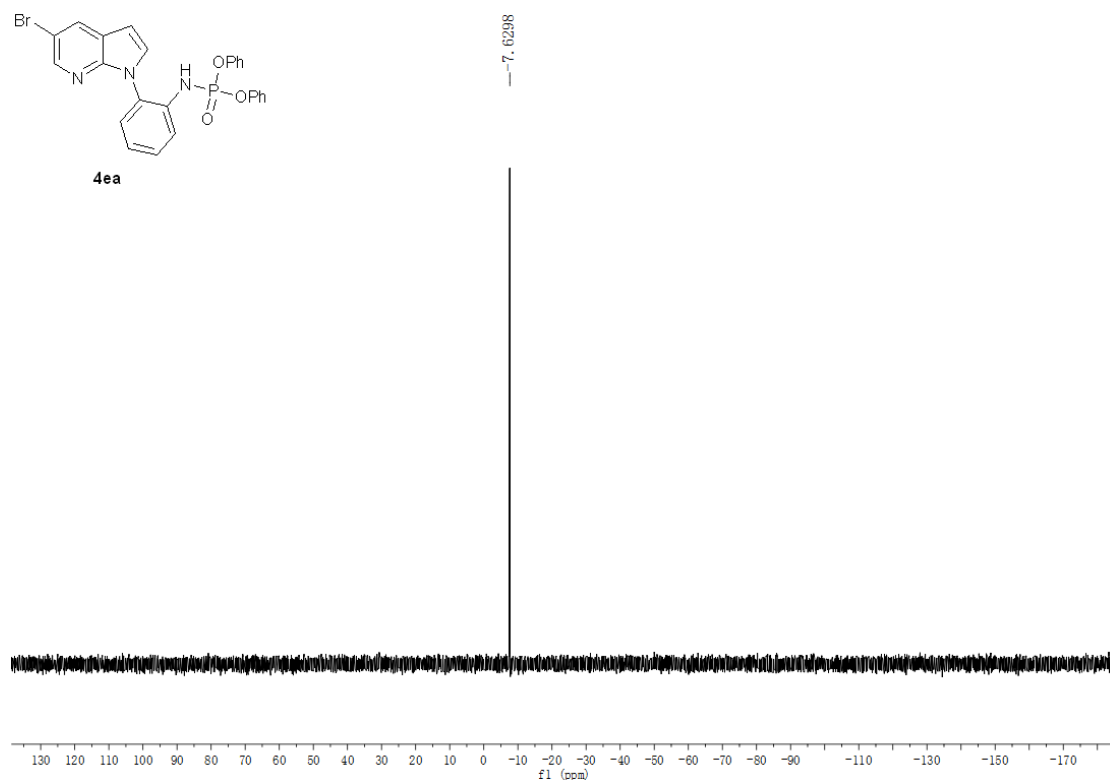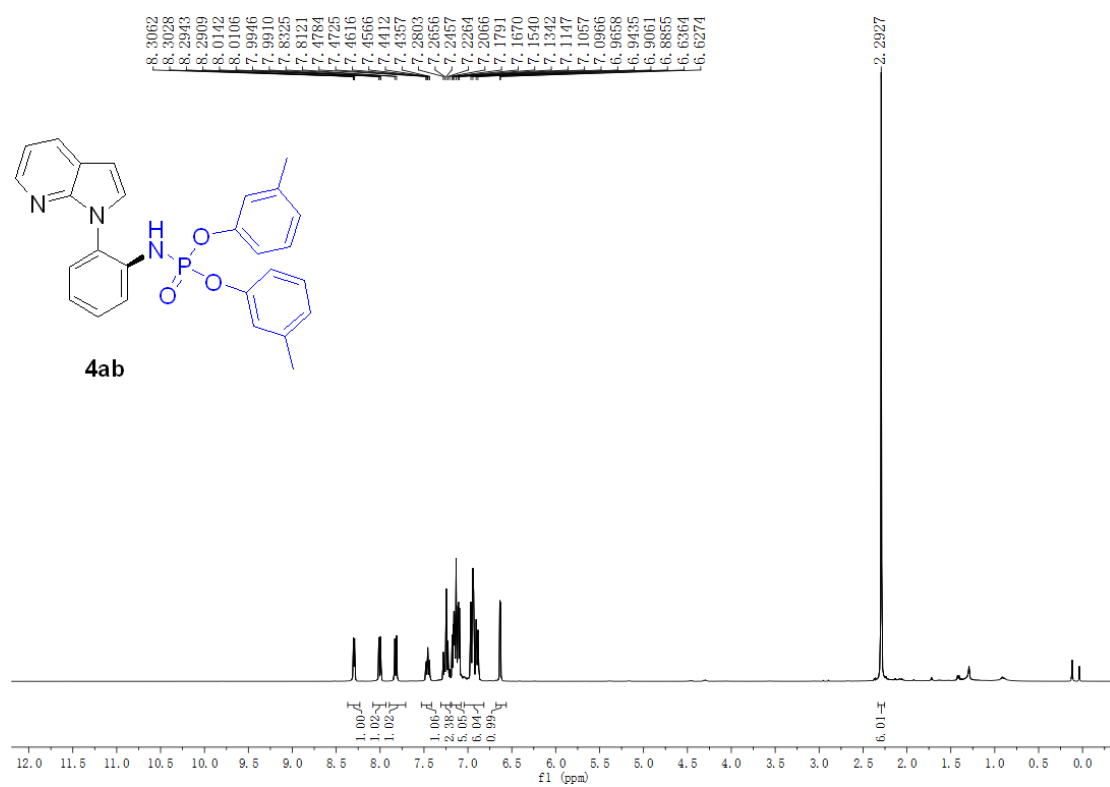

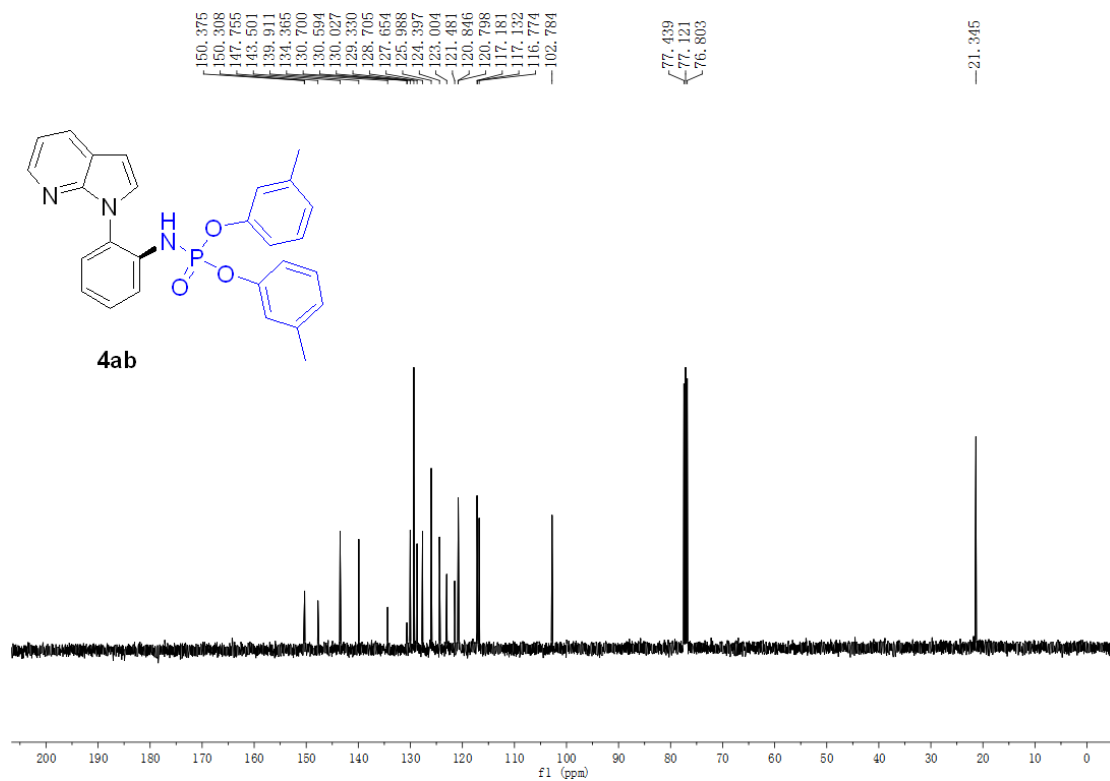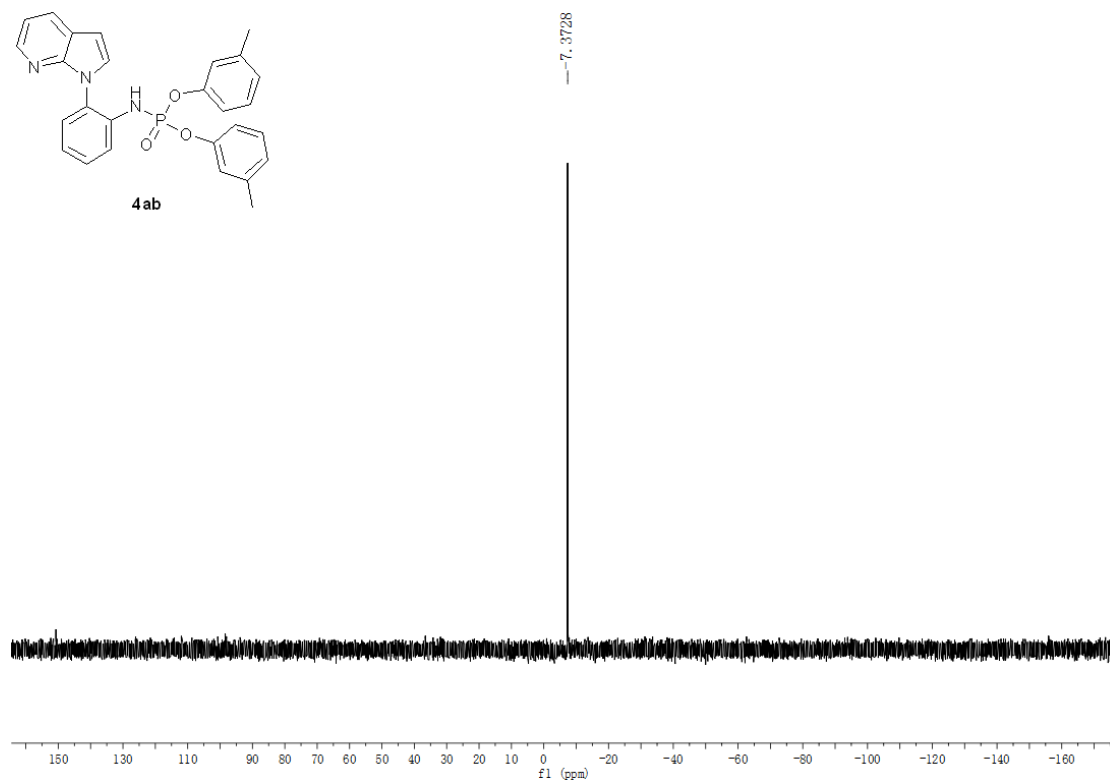

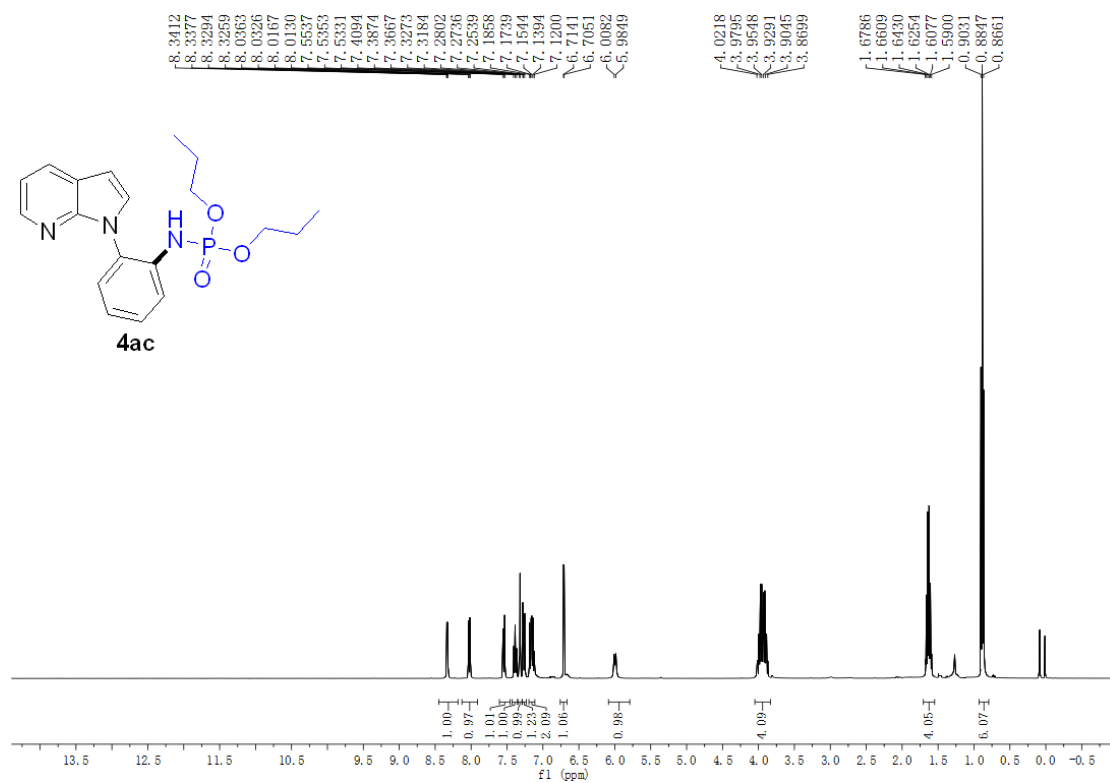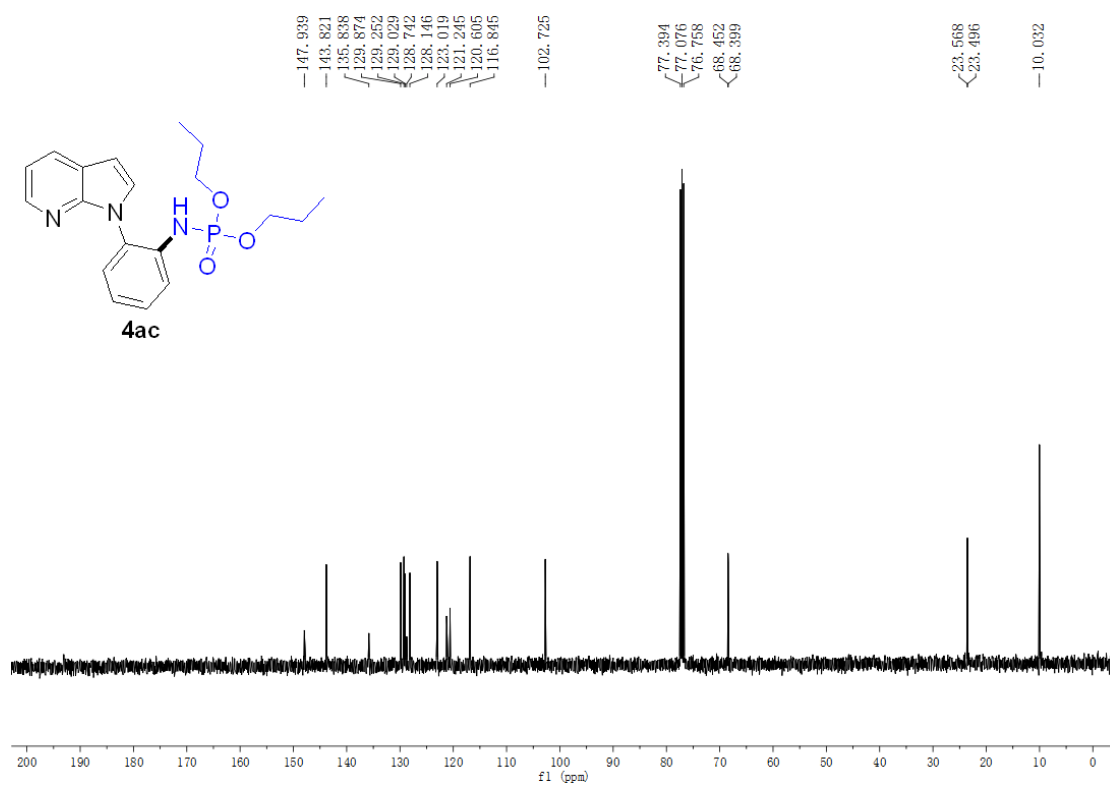



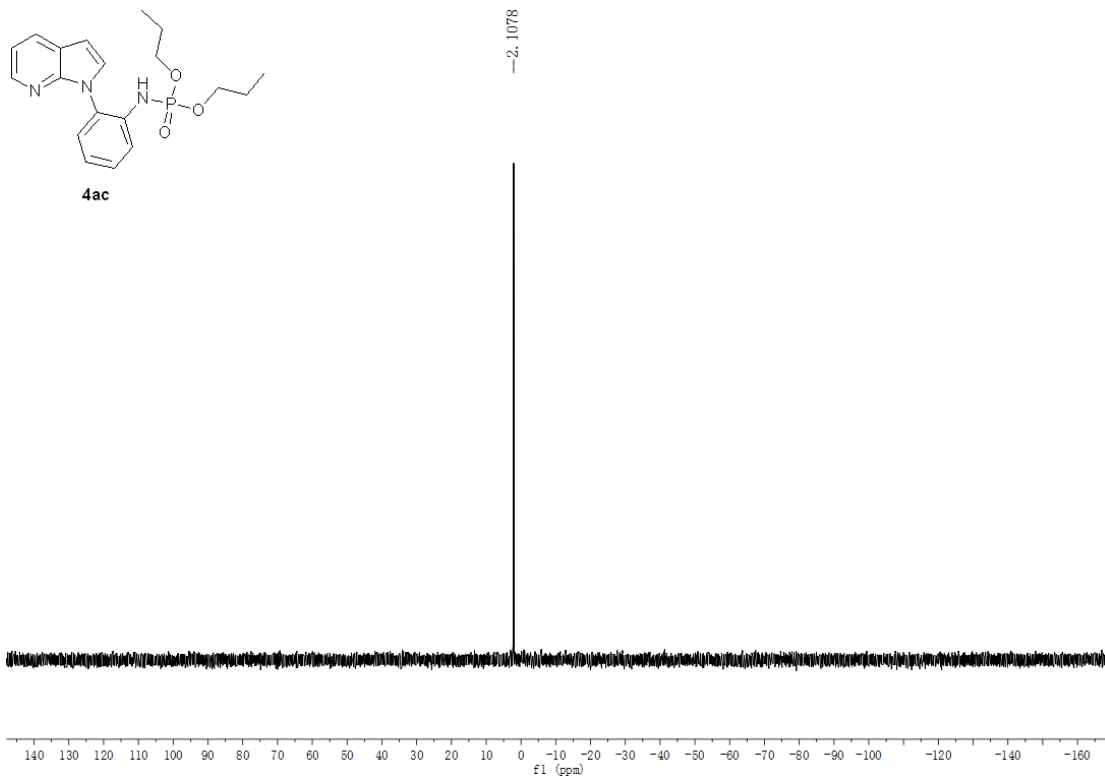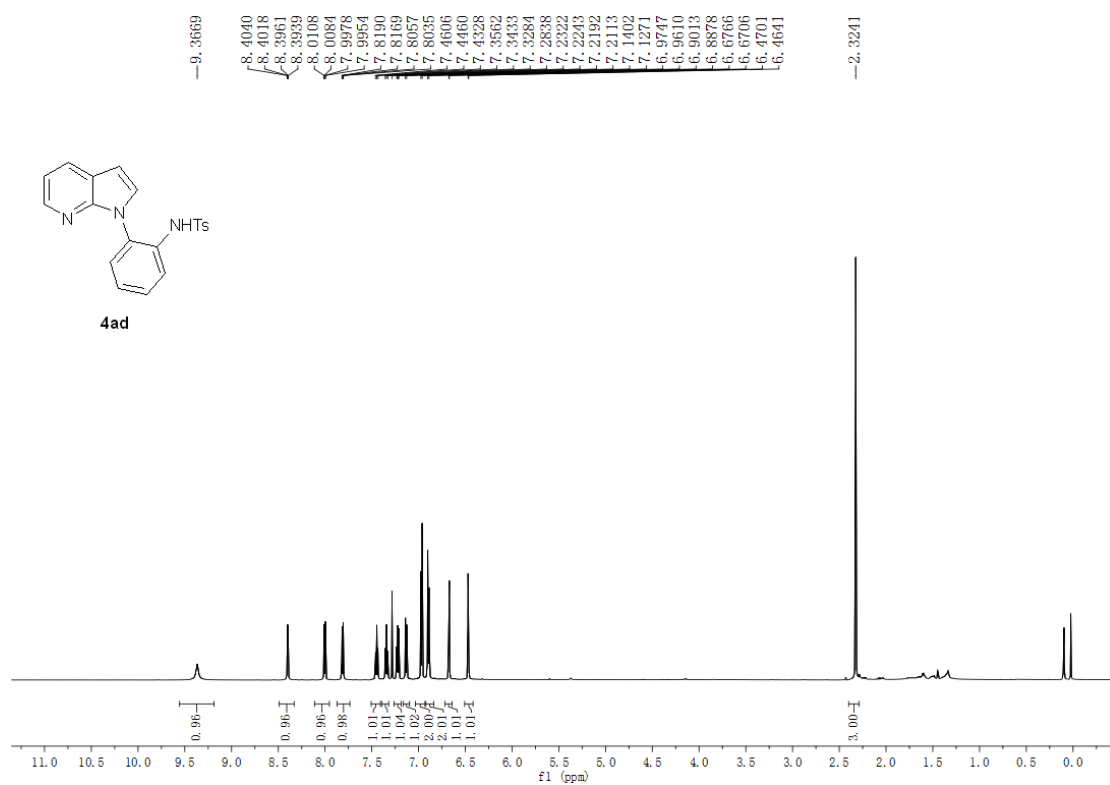

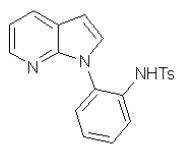

4ad

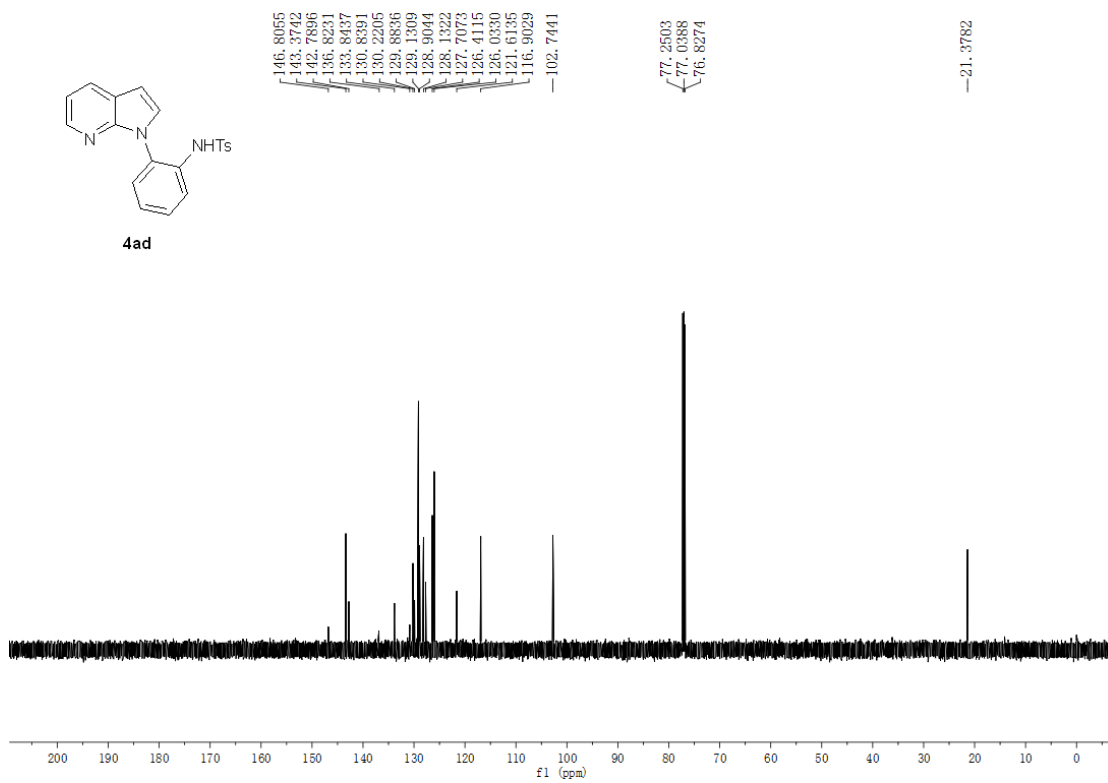

Supplement: c8ob00776d1.pdf [file c8ob00776d1.pdf]
